# Supplementary material for: Metal-free efficient thiolation of C(sp2) functionalization via in situ-generated NHTS for the synthesis of novel sulfenylated 2-aminothiazole and imidazothiazole
Source: Royal Society of Chemistry journal article supplement (doi:10.1039/d0nj05904h), 2021-01-01
Supplement: d0nj05904h1.pdf [file d0nj05904h1.pdf]

Metal free, Selective thiolation of C(sp<sup>2</sup>)-H bond Functionalization via *in situ*-generated NHTS  
for Synthesis of Novel Sulfenylated 2-aminothiazole and Imidazothiazole

1. a) **General procedure for the synthesis of 5-((1H-benzo[d]imidazol-2-yl)thio)-4-(4-chlorophenyl)thiazol-2-amine (5a).**

NCS (1.5 mmol) was taken in round bottom flask containing CH<sub>3</sub>OH. To this same pot 1H-benzo[d]imidazole-2-thiol (**2a**) (**Scheme 2**) (2 mmol) was added slowly with constant stirring, and reaction mass was stirred at room temperature up to 5 minutes. As TLC indicate the formation of (NHTS). Furthermore to the same pot 4-(4-chlorophenyl)thiazol-2-amine (2 mmol) was added with small proportions at a time and stirring was continued for another 20 minutes, as TLC indicate the completion of reaction. The reaction mass was poured on ice cold water, solid product separated out was filtered, dried and washed with aqueous ethanol. No further purification like column chromatography was needed.

**(b) Spectral data of 5-((1H-benzo[d]imidazol-2-yl)thio)-4-(4-chlorophenyl)thiazol-2-amine (5a)** pale yellow solid, mp 99-100 °C. FT-IR: 3462 (-NH<sub>2</sub>), 1171 (C-S-C) cm<sup>-1</sup>. <sup>1</sup>H-NMR (400 MHz, DMSO-*d*<sub>6</sub>) δ 12.54 (s, 1H), 7.87 (m, 2H), 7.72 (m, 2H), 7.48 (m, 4H), 7.16 (m 2H). <sup>13</sup>C-NMR (400 MHz, DMSO-*d*<sub>6</sub>) δ 171.06, 156.28, 150.20, 133.53, 133.20, 130.82, 128.60, 122.27, 114.77, 99.44, HRMS (ESI-TOF) m/z: [M+1] Calculated for C<sub>16</sub>H<sub>11</sub>ClN<sub>4</sub>S<sub>2</sub>: 358.0114, found 359.0183.

# IR

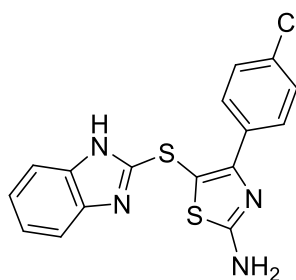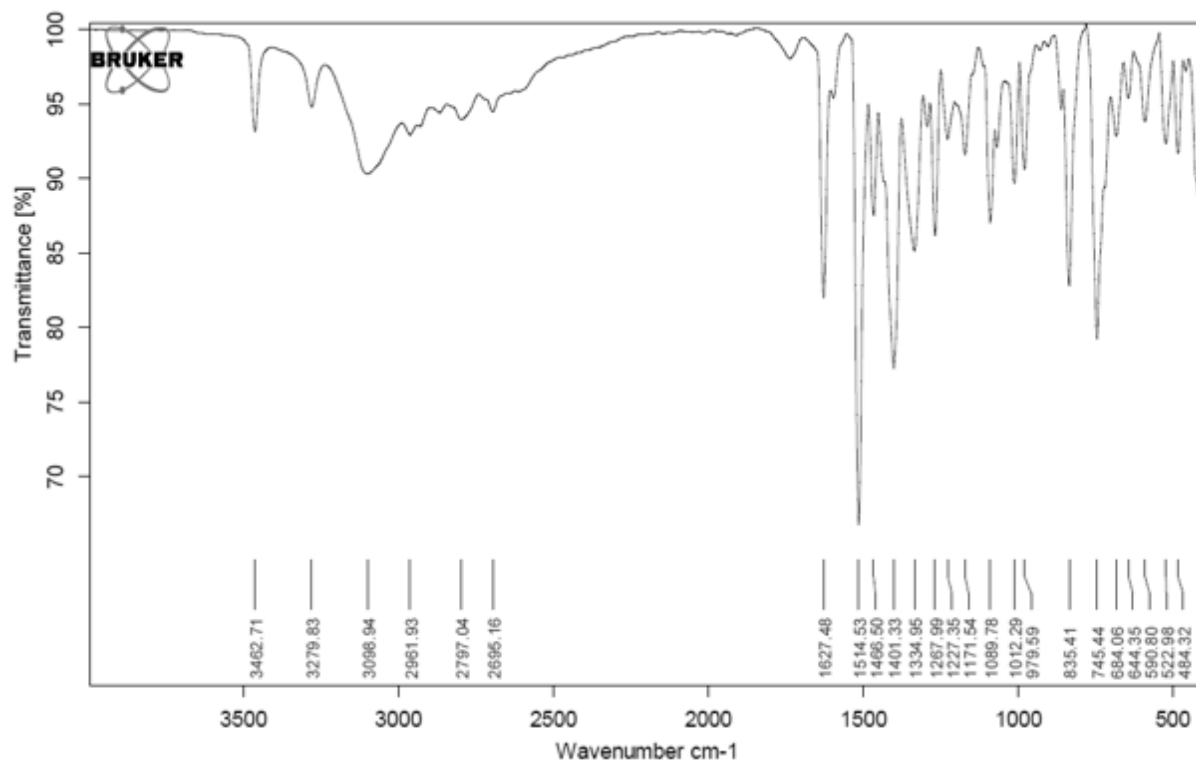

# <sup>1</sup>H NMR

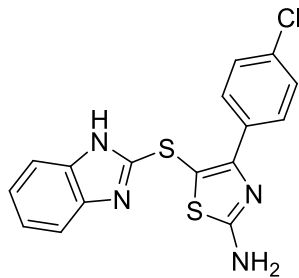

New folder (2)  
SVG-R2-1H

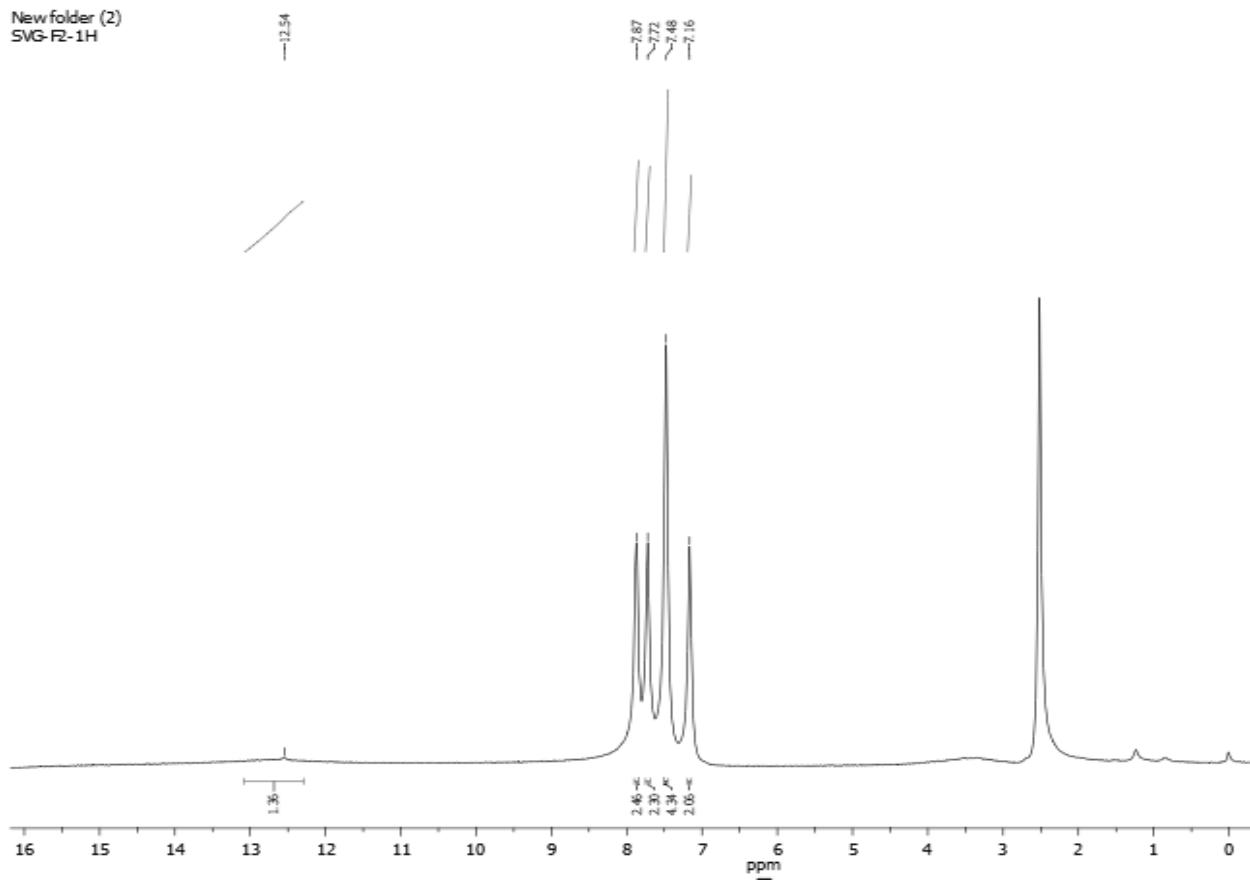

# <sup>13</sup>C NMR

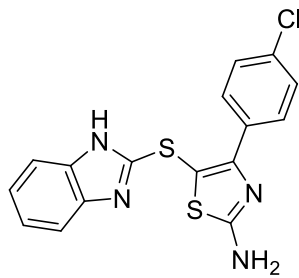

New folder (2)  
SVG-R-13C

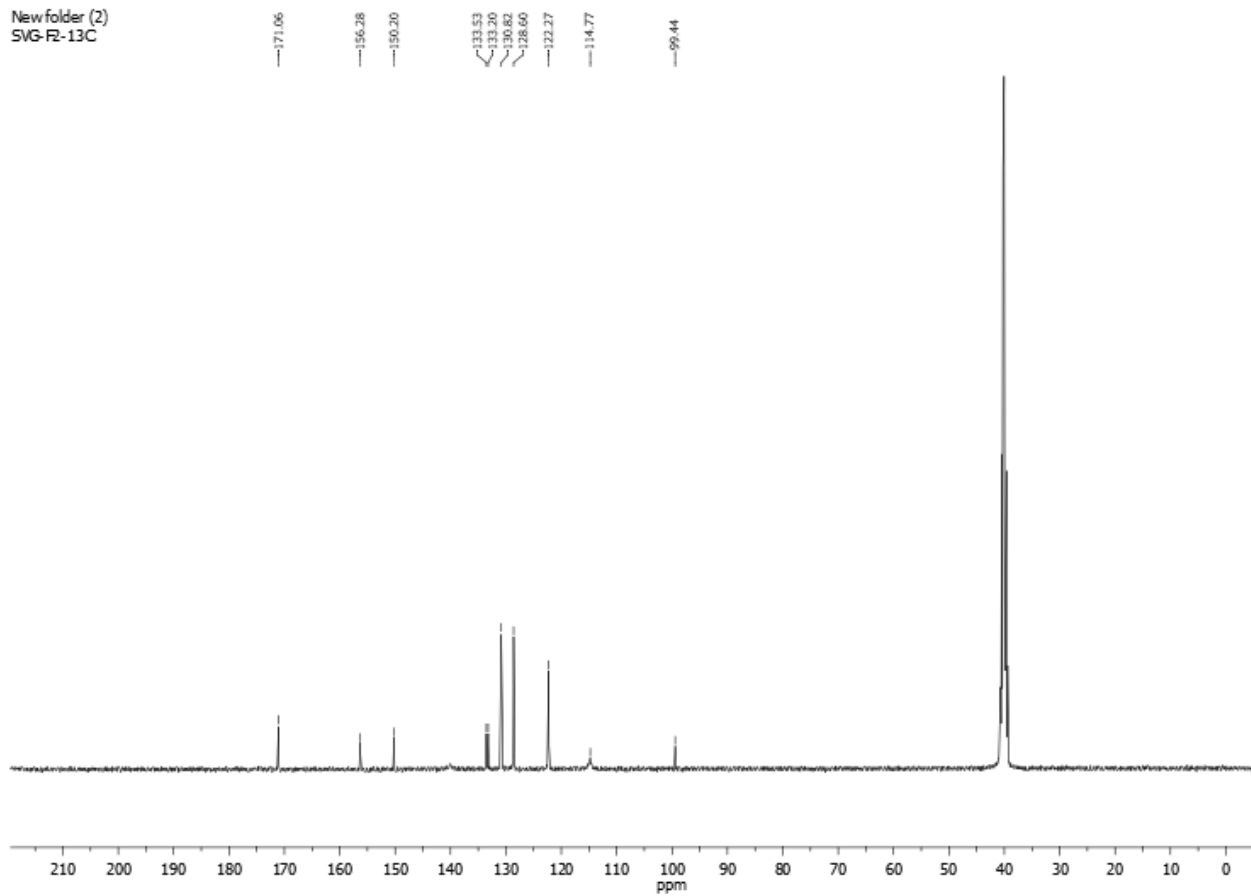

## HRMS

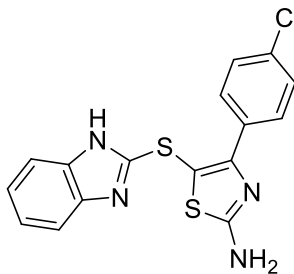

Calculated for C<sub>16</sub>H<sub>11</sub>ClN<sub>4</sub>S<sub>2</sub>: 358.0114, found 359.0183.

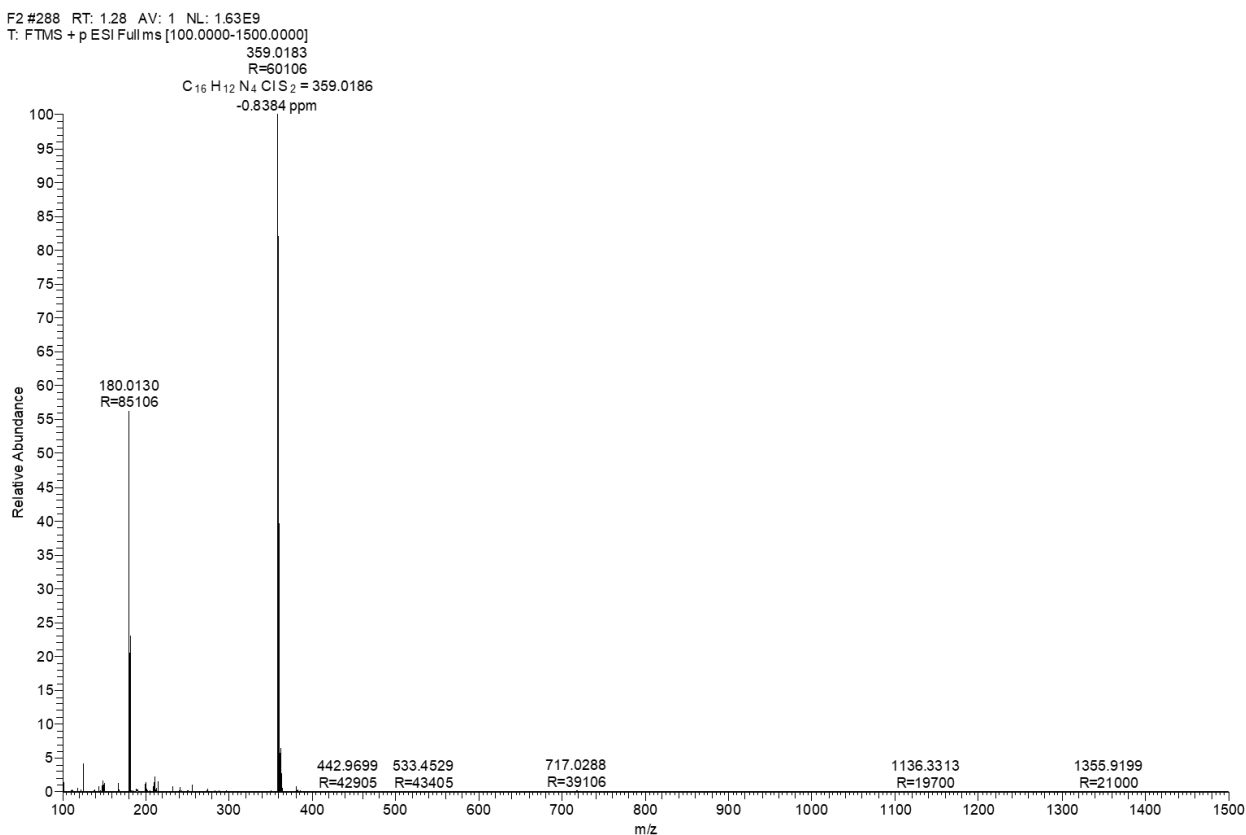

(c) Spectral data of 5-((1H-benzod[imidazol-2-yl)thio)-4-(4-bromophenyl)thiazol-2-amine (**5b**) White solid, mp 110-111 °C. <sup>1</sup>H-NMR (400 MHz, DMSO-*d*<sub>6</sub>) δ 12.50 (s, 1H), 7.79-7.61 (m, 2H), 7.59 (m, 2H), 7.49-7.48 (m, 2H), 7.47 (m 2H), 7.19-7.17 (m 2H). <sup>13</sup>C-NMR (400 MHz, DMSO-*d*<sub>6</sub>) δ 171.20, 156.57, 150.30, 133.42, 131.54, 131.11, 122.62,

122.31, 114.69, 98.93. HRMS (ESI-TOF) m/z: [M+1] Calculated for C<sub>16</sub>H<sub>11</sub>BrN<sub>4</sub>S<sub>2</sub>:  
401.9609, found 404.9672.

### <sup>1</sup>H NMR

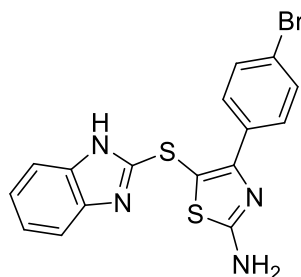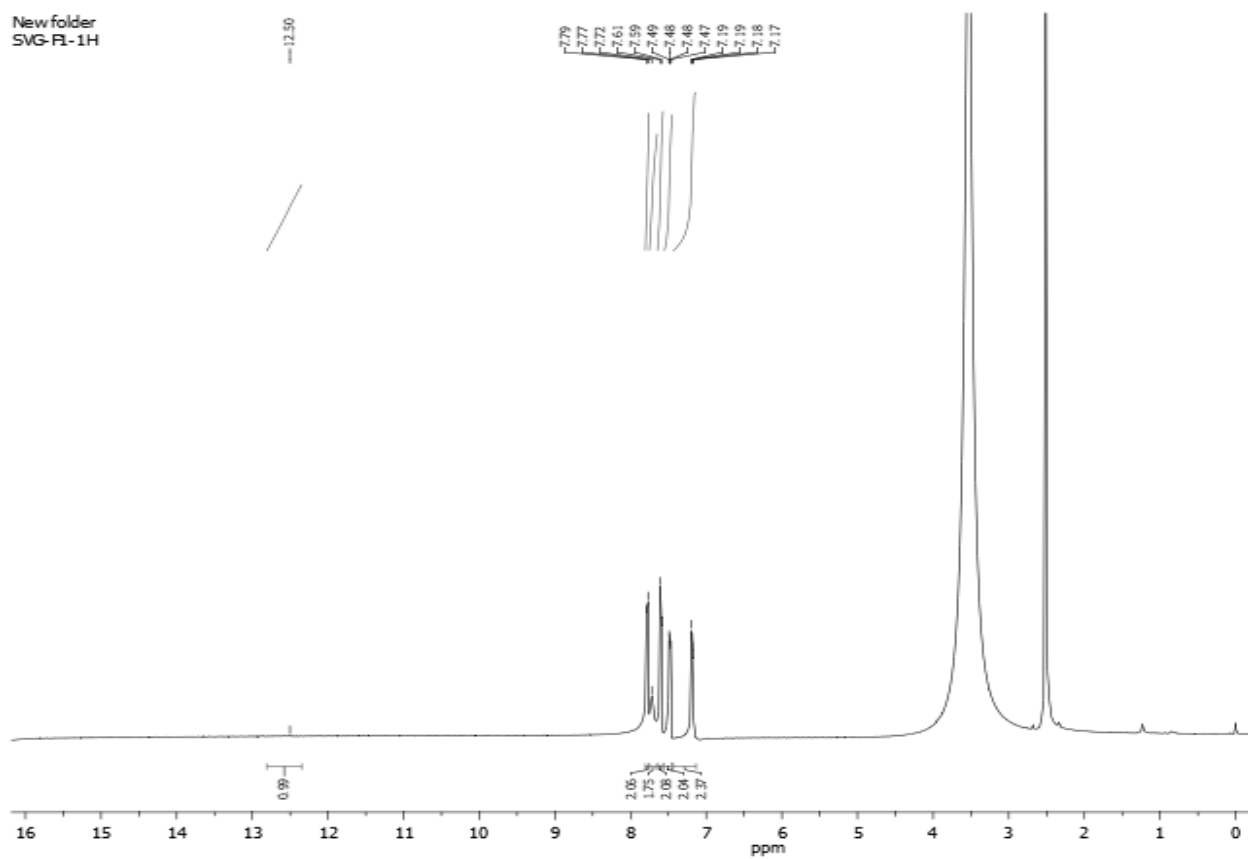

# <sup>13</sup>C NMR

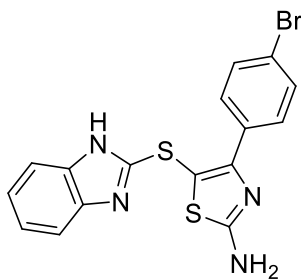

New folder  
SVG-R-13C

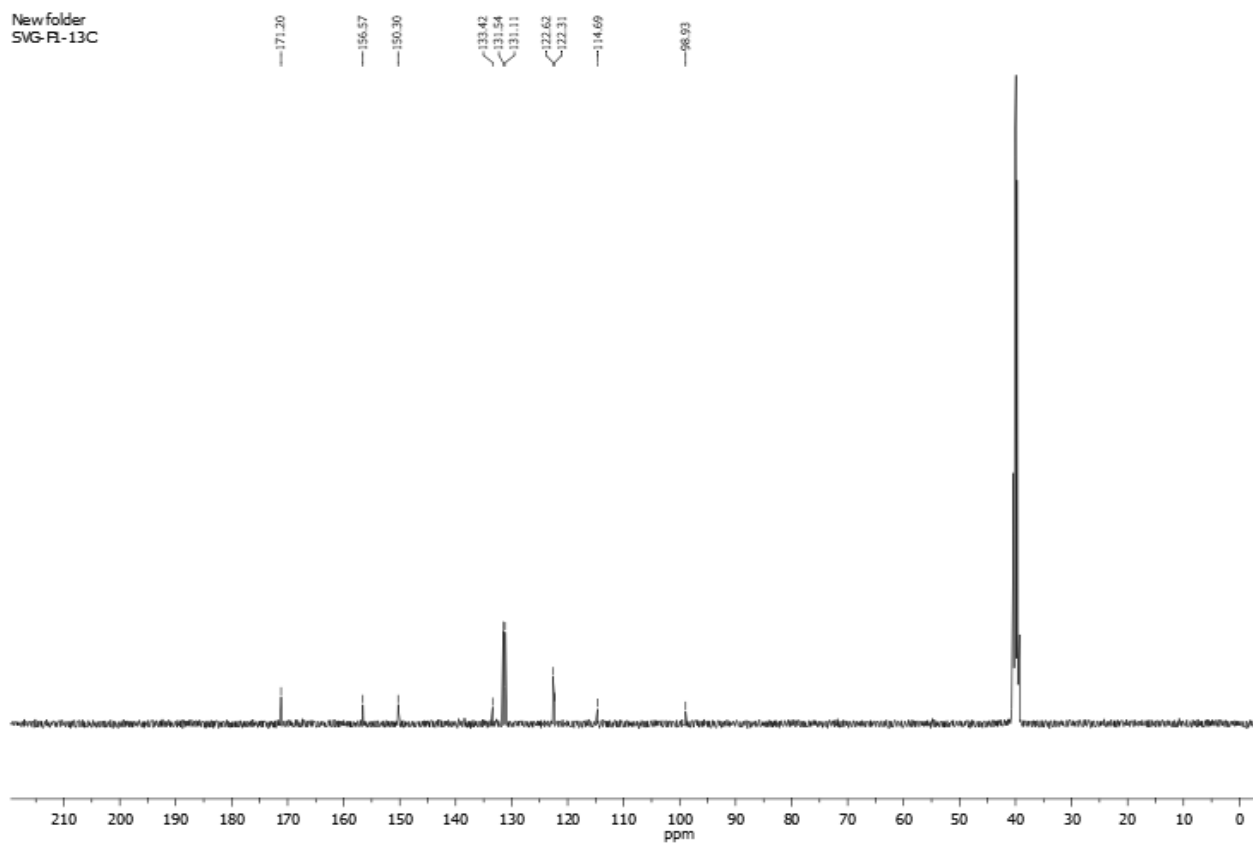

## HRMS

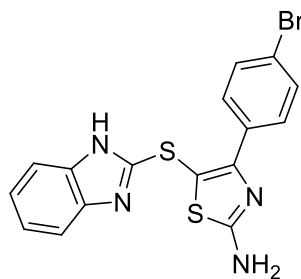

Calculated for C<sub>16</sub>H<sub>11</sub>BrN<sub>4</sub>S<sub>2</sub>: 401.9609, found 404.9672.

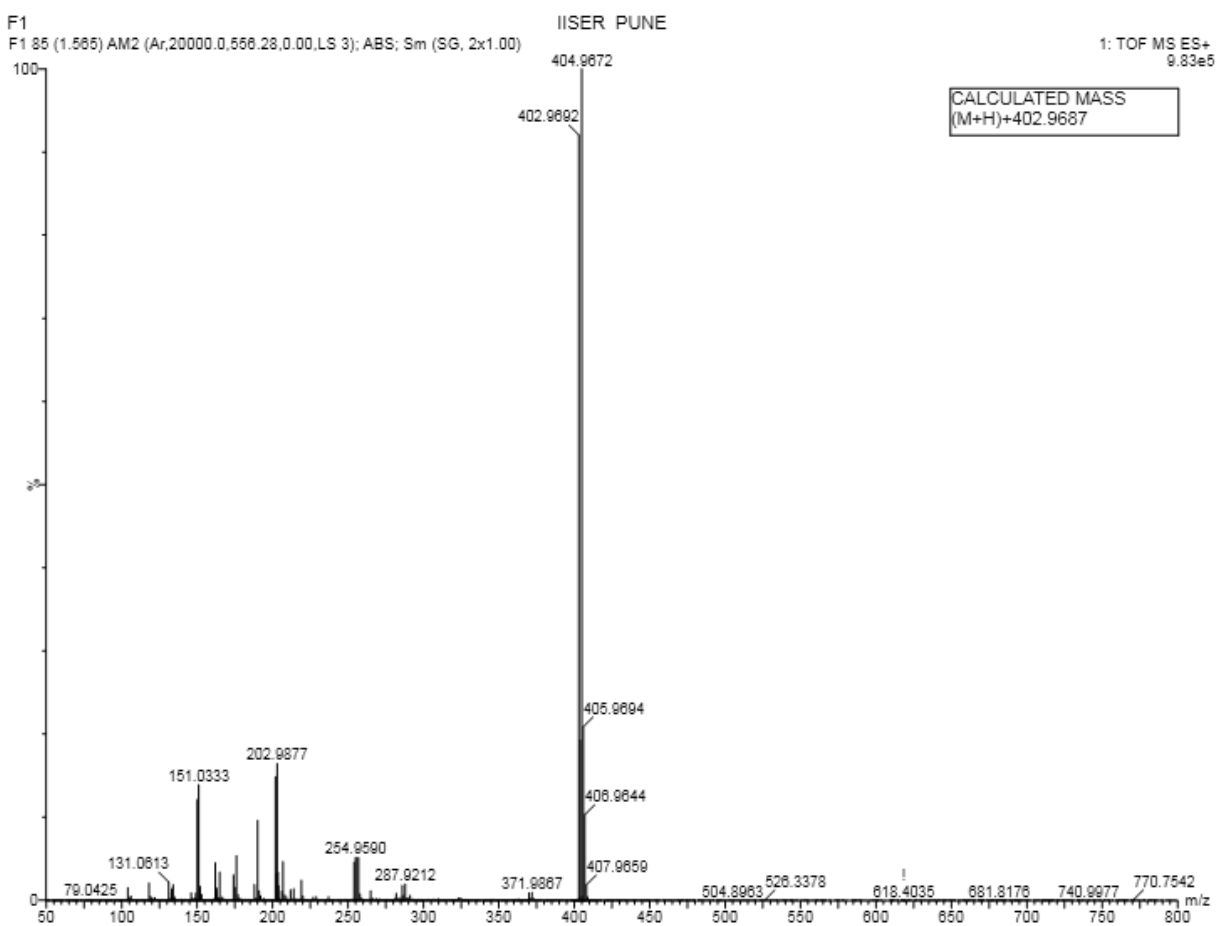

(d) Spectral data of 5-((1H-benzo[d]imidazol-2-yl)thio)-4-(p-tolyl)thiazol-2-amine (5c) White solid, mp 100-101 °C. <sup>1</sup>H-NMR (400 MHz, DMSO-*d*<sub>6</sub>) δ 12.47 (s, 1H), (m,



2H), 7.70-7.63 (m, 4H), 7.51-7.39 (m, 2H), 7.16 (m 4H), 2.28 (s 3H).  $^{13}\text{C}$ -NMR (400 MHz, DMSO- $d_6$ )  $\delta$  170.88, 157.74, 150.65, 138.36, 131.55, 129.09, 122.35, 122.00, 118.11, 111.32, 98.03, 21.30. HRMS (ESI-TOF)  $m/z$ :  $[M+1]$  Calculated for  $\text{C}_{17}\text{H}_{14}\text{N}_4\text{S}_2$ : 338.0660, found 339.0730.

## $^1\text{H}$ NMR

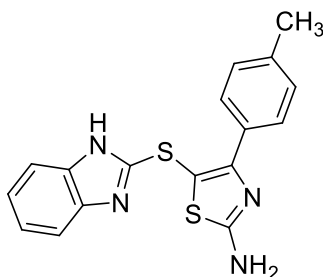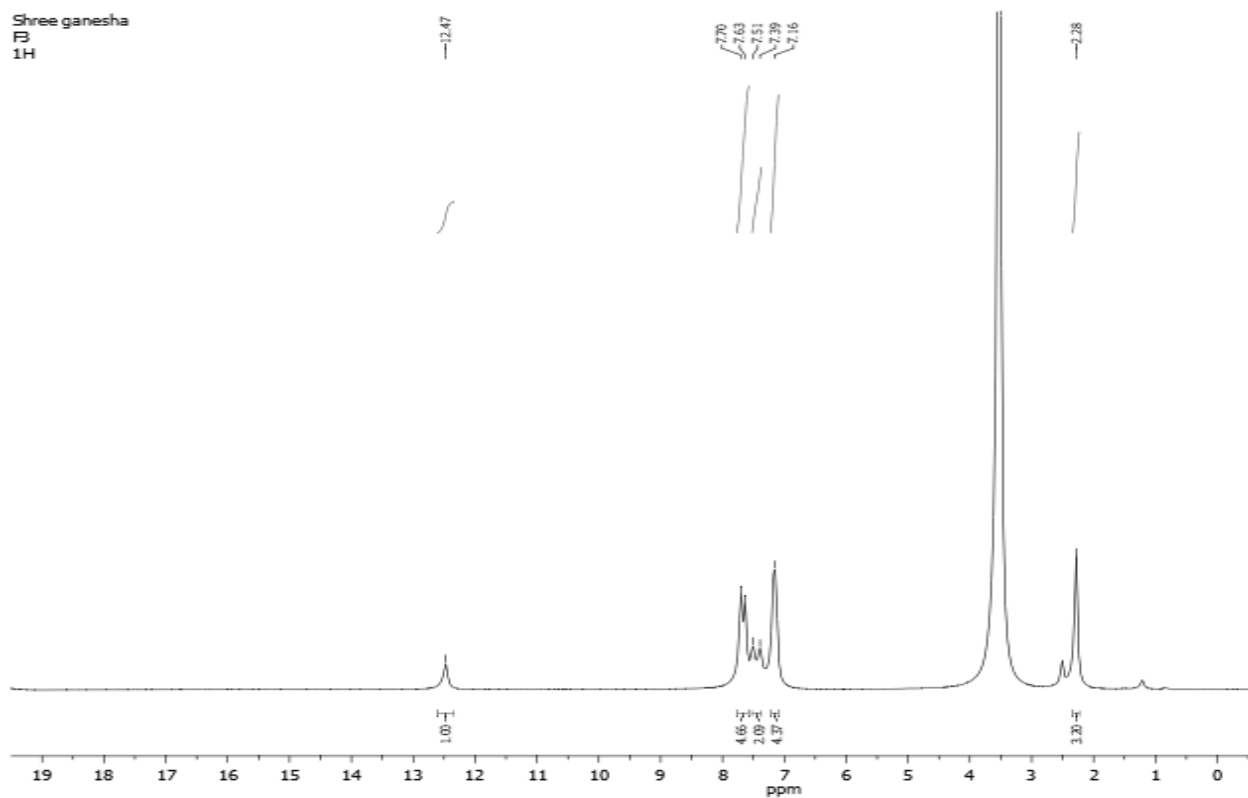

# <sup>13</sup>C NMR

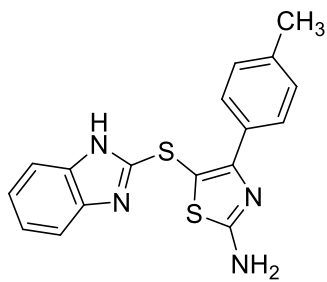

Shree ganesha  
13C

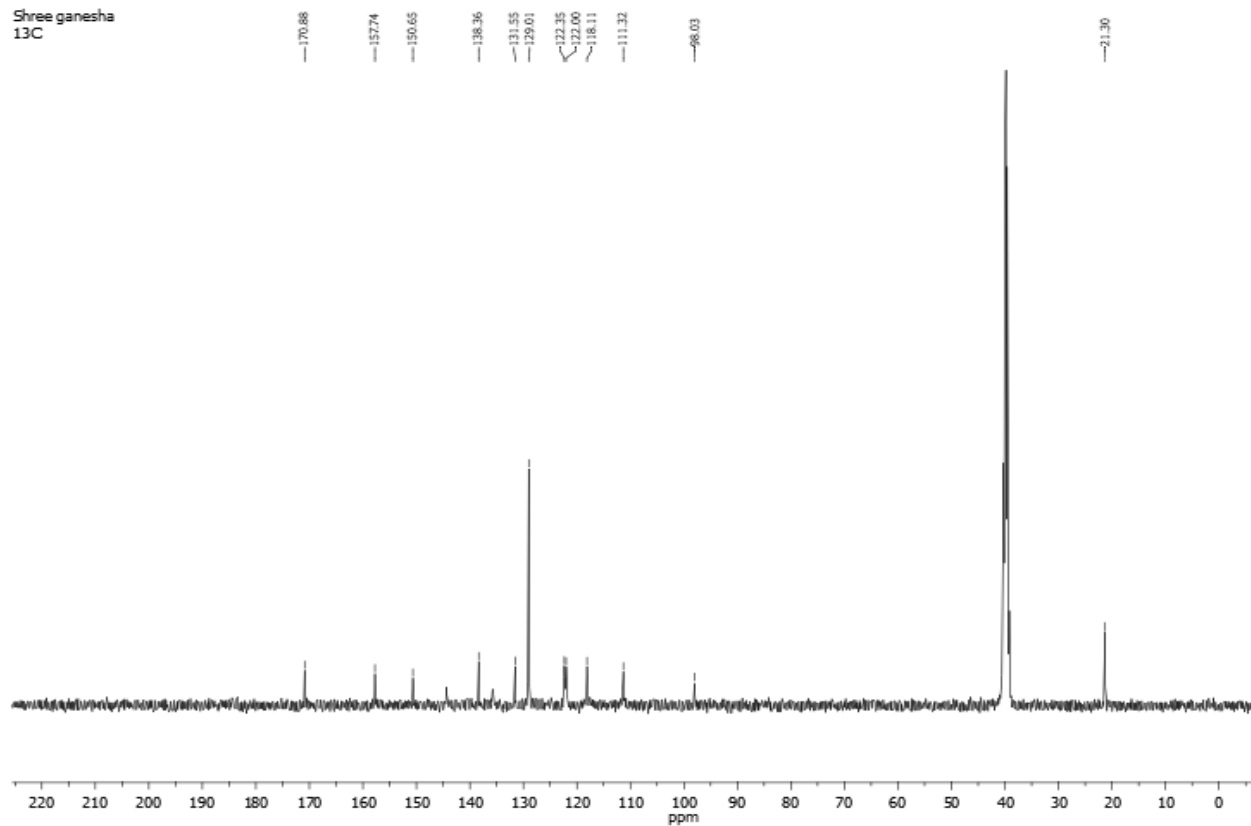

## HRMS

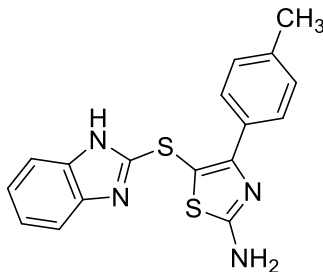

Calculated for  $C_{17}H_{14}N_4S_2$ : 338.0660, found 339.0730.

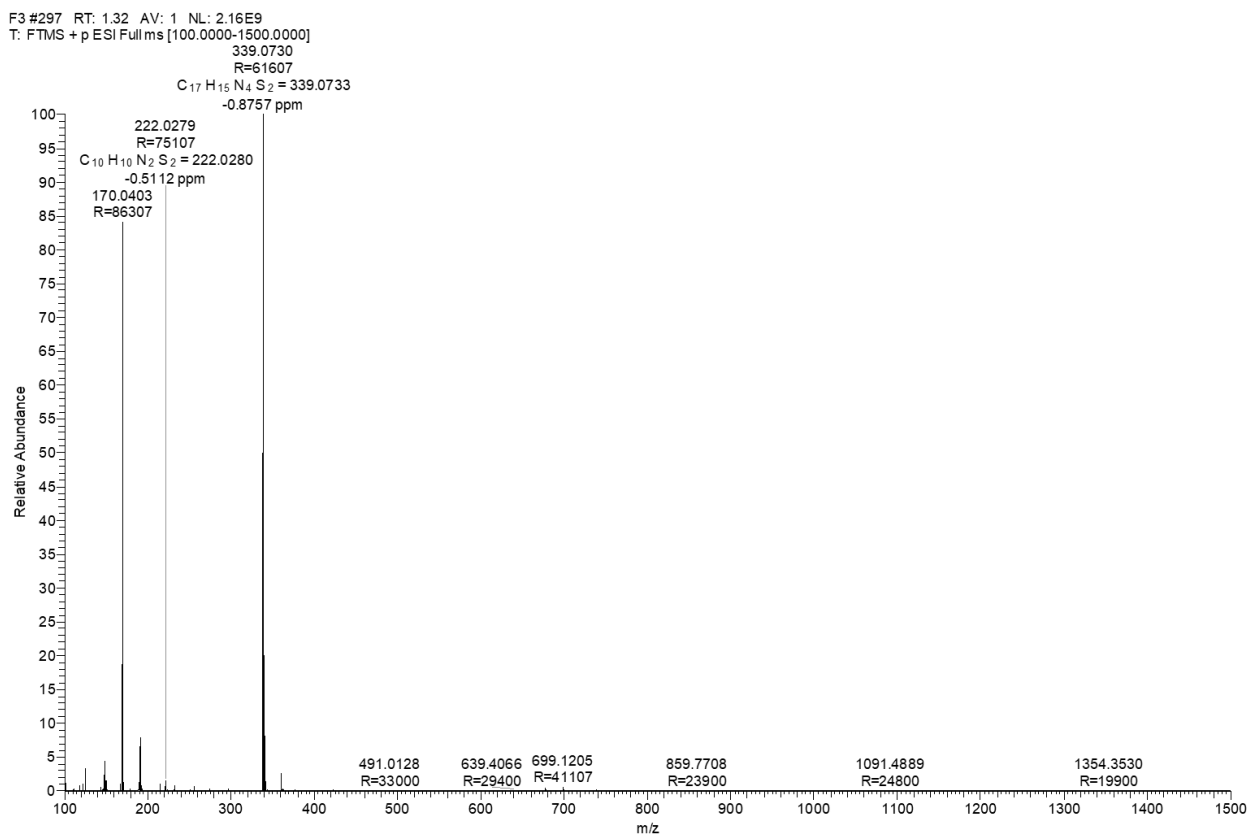

(e) Spectral data of 5-((1H-benzo[d]imidazol-2-yl)thio)-4-(4-fluorophenyl)thiazol-2-amine (**5d**) White solid, mp 112-113 °C.  $^1H$ -NMR (400 MHz, DMSO- $d_6$ )  $\delta$  12.49 (s, 1H), 7.89-7.85 (m, 2H), 7.63 (m, 2H), 7.24-7.20 (m, 2H), 7.16-7.15 (m 2H), 7.14-7.13 (m 2H).  $^{13}C$ -NMR (400 MHz, DMSO- $d_6$ )  $\delta$  170.95, 163.67, 161.23, 156.57, 150.29, 144.45, 135.84, 131.27, 131.19, 130.88, 130.85, 122.38, 122.01, 118.20, 115.51, 115.30, 111.37,

98.84. HRMS (ESI-TOF) m/z: [M+1] Calculated for C<sub>16</sub>H<sub>11</sub>FN<sub>4</sub>S<sub>2</sub>: 342.0409, found 343.0470.

### <sup>1</sup>H NMR

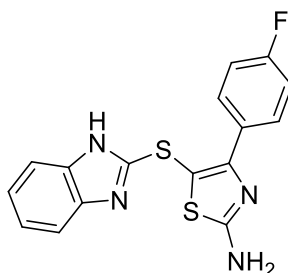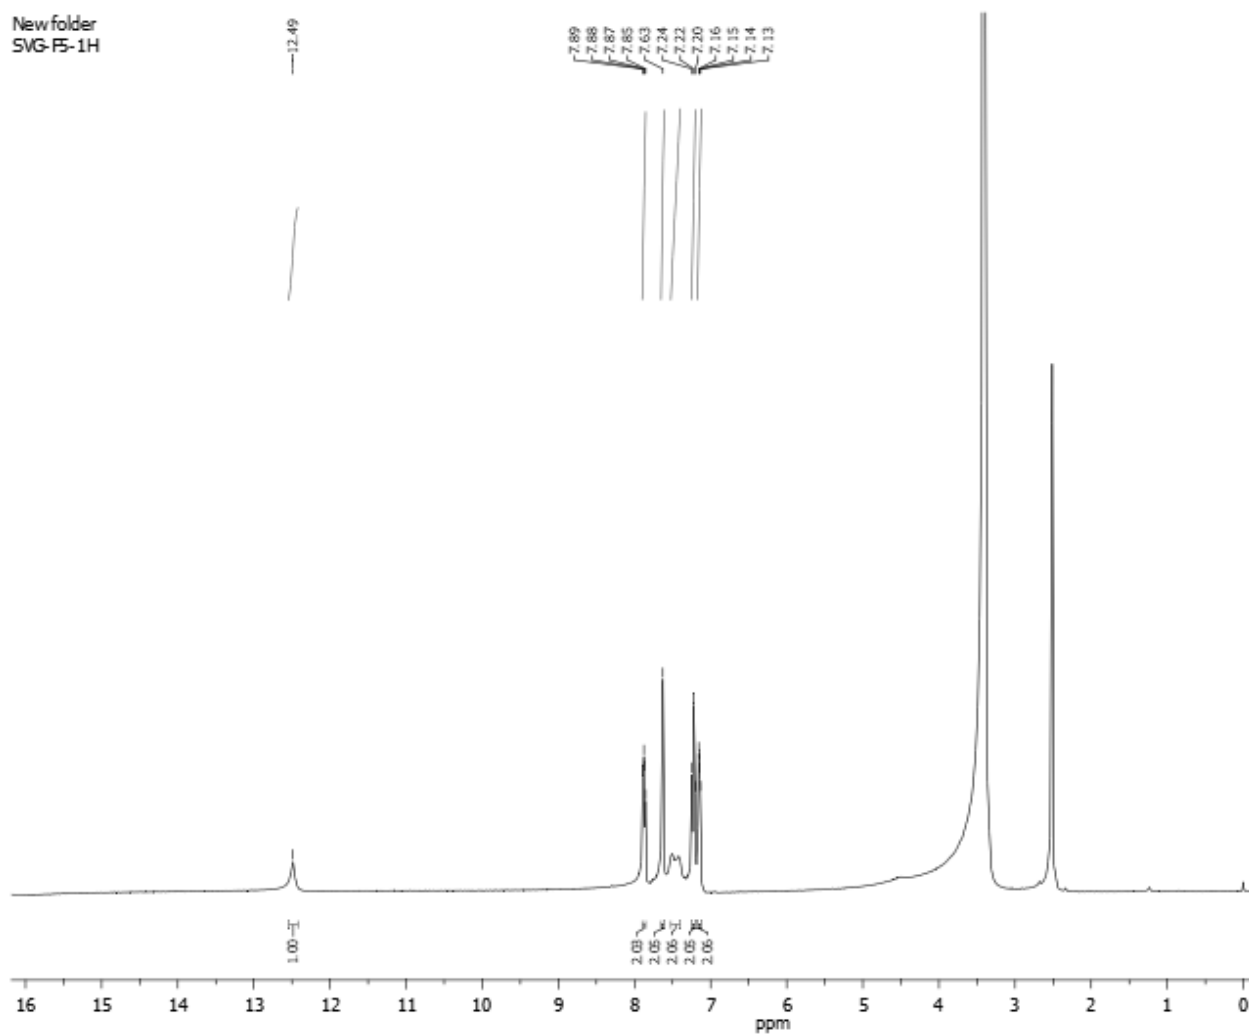

# <sup>13</sup>C NMR

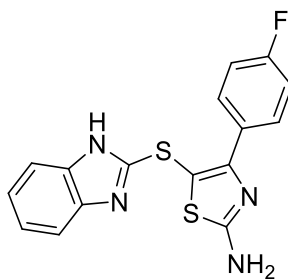

New folder  
SVG-F5-13C

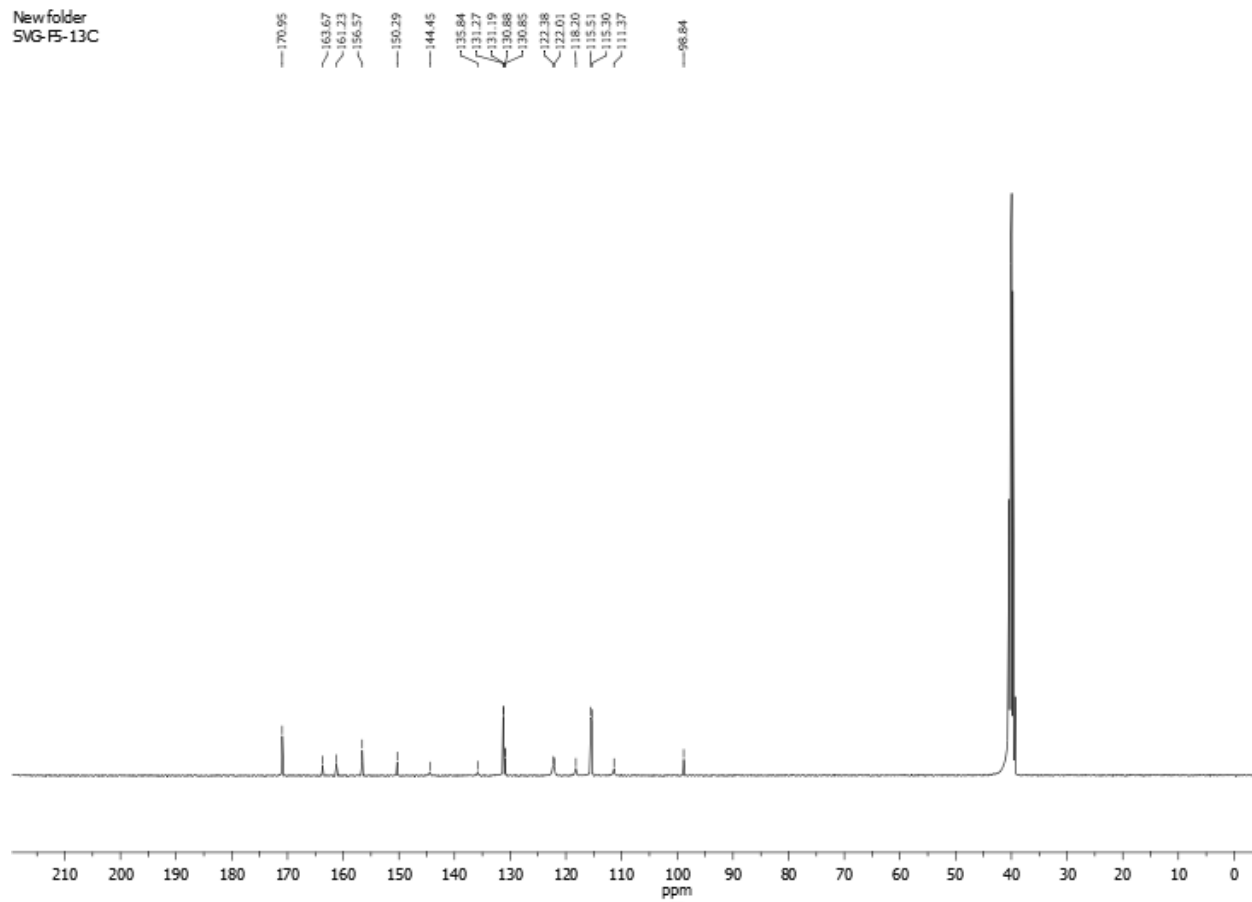

## HRMS

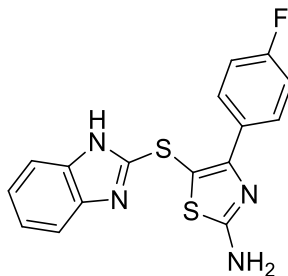

Calculated for C<sub>16</sub>H<sub>11</sub>FN<sub>4</sub>S<sub>2</sub>: 342.0409, found 343.0470.

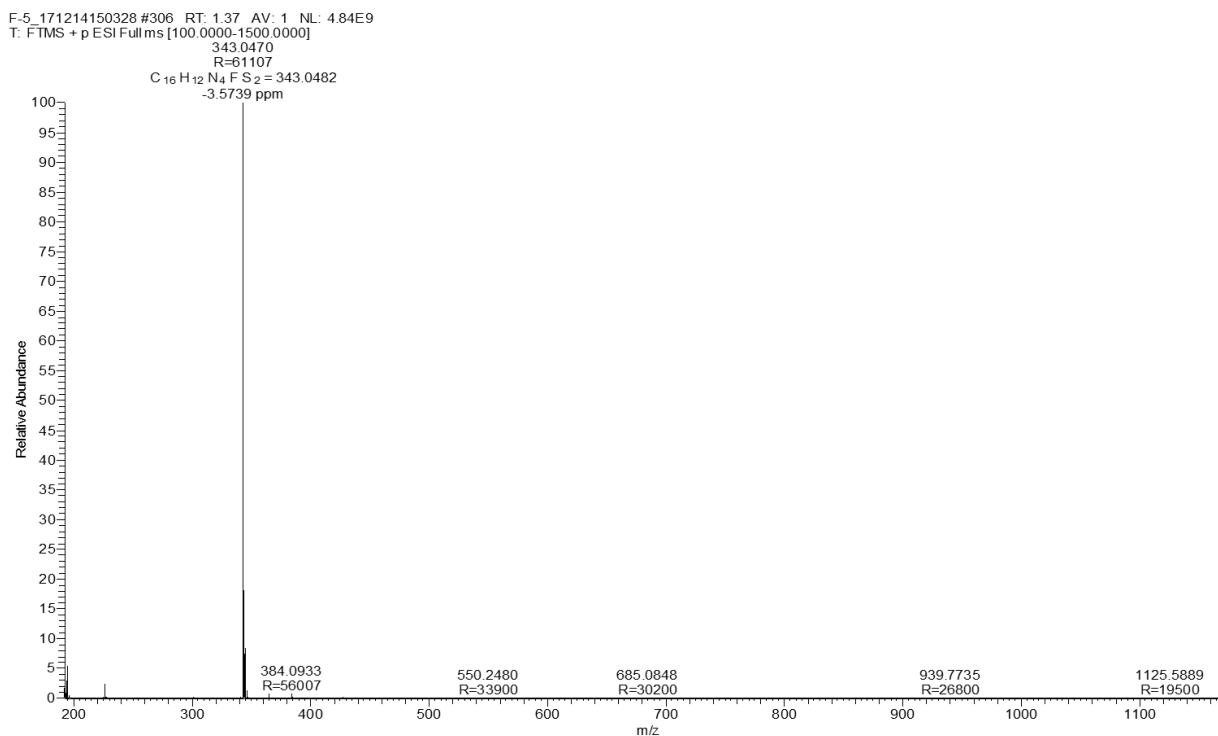

### 2. a) General procedure for the synthesis of 4-(4-chlorophenyl)-5-((5-(pyridin-4-yl)-1,3,4-oxadiazol-2-ylthio)thiazol-2-amine (5e).

NCS (1.5 mmol) was taken in round bottom flask containing CH<sub>3</sub>OH. To this same pot 5-(pyridin-4-yl)-1,3,4-oxadiazole-2-thiol (**2c**) (**Scheme 2**) (2 mmol) was added slowly with constant stirring, and reaction mass was stirred at room temperature up to 5 minutes.

As TLC indicate the formation of (NHTS). Furthermore to the same pot 4-(4-chlorophenyl)thiazol-2-amine (2 mmol) was added with small proportions at a time and stirring was continued for another 20 minutes, as TLC indicate the completion of reaction. The reaction mass was poured on ice cold water, solid product separated out was filtered, dried and washed with aqueous ethanol. No further purification like column chromatography was needed.

**b) Spectral data of 4-(4-chlorophenyl)-5-((5-(pyridin-4-yl)-1,3,4-oxadiazol-2-yl)thio)thiazol-2-amine (5e)** White solid, mp 115-116 °C. <sup>1</sup>H-NMR (400 MHz, DMSO-*d*<sub>6</sub>) δ 8.81 (s, 2H), 7.83 (m, 6H), 7.49-7.48 (m, 2H). <sup>13</sup>C-NMR (400 MHz, DMSO-*d*<sub>6</sub>) δ 171.63, 164.63, 157.71, 151.43, 133.92, 132.62, 130.97, 130.50, 128.76, 120.48, 95.35. HRMS (ESI-TOF) m/z: [M+1] Calculated for C<sub>16</sub>H<sub>10</sub>ClN<sub>5</sub>OS<sub>2</sub>: 387.0015, found 388.0096.

# <sup>1</sup>H NMR

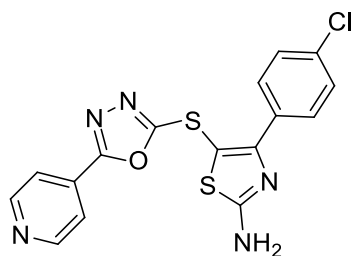

Shree ganesha  
G2  
1H

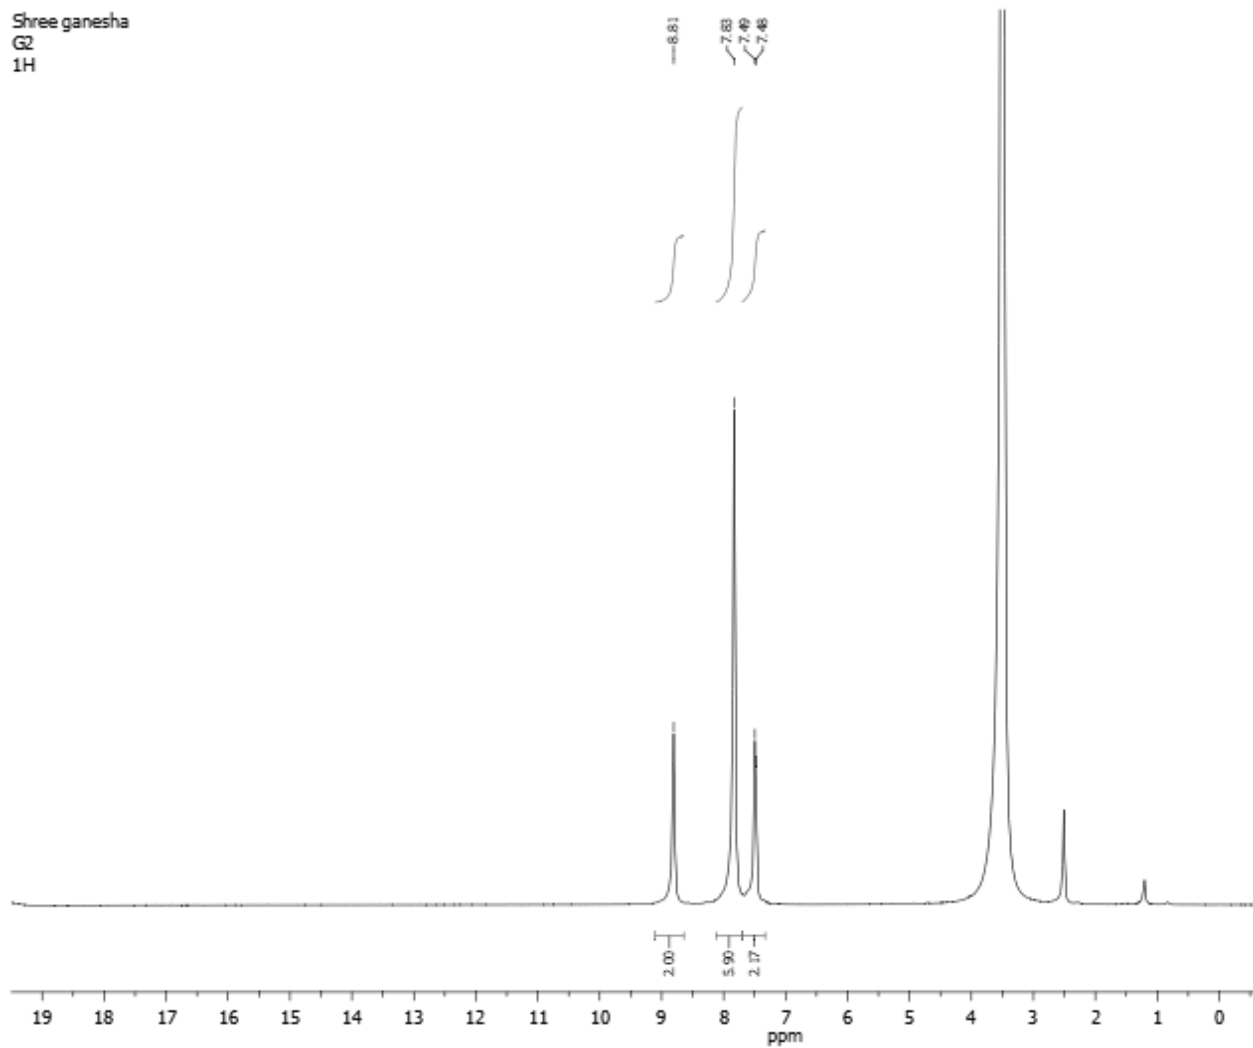



# <sup>13</sup>C NMR

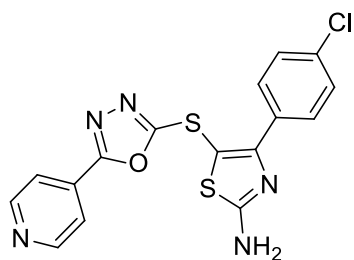

Shree ganesha  
13C

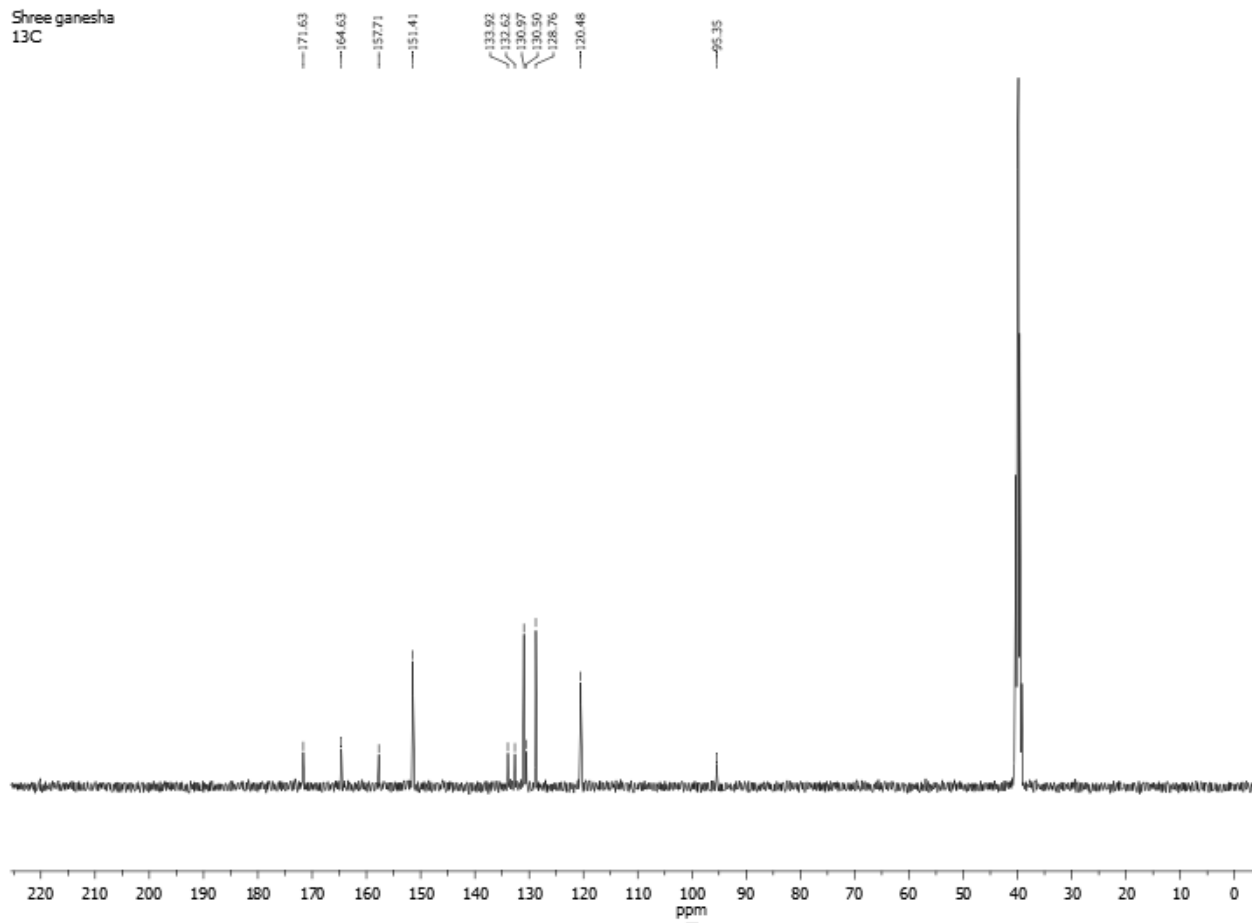

## HRMS

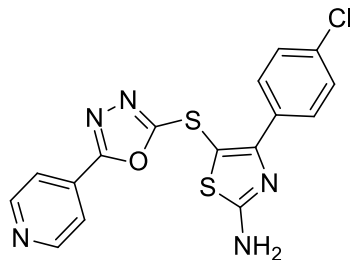

Calculated for  $C_{16}H_{10}ClN_5OS_2$ : 387.0015, found 388.0096.

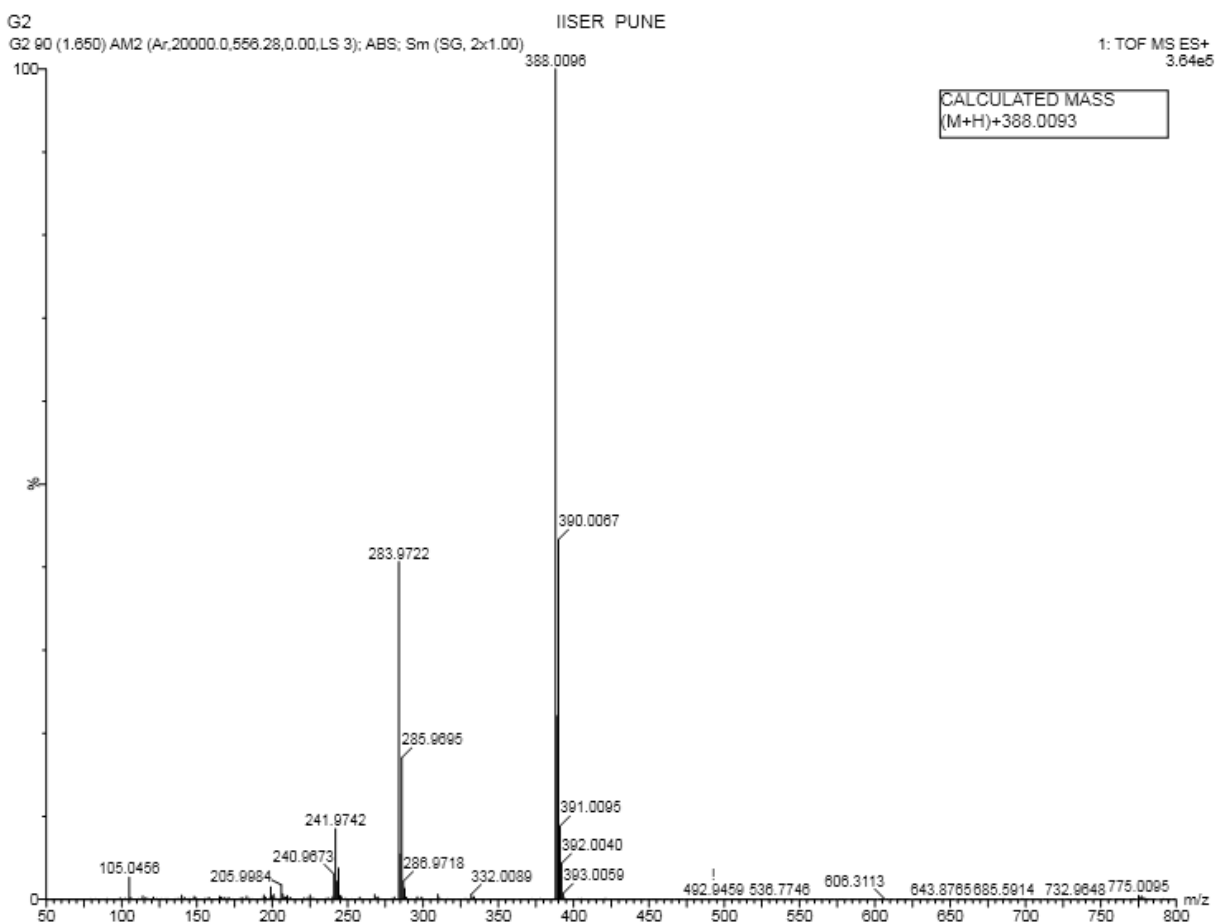

(c) Spectral data of **5-((1H-benzo[d]imidazol-2-yl)thio)-4-(4-bromophenyl)thiazol-2-amine (5f)** White solid, mp 120-121 °C.  $^1\text{H-NMR}$  (400 MHz,  $\text{DMSO-}d_6$ )  $\delta$  8.83 (s, 2H), 7.86-7.78 (m, 6H), 7.66 (m, 2H).  $^{13}\text{C-NMR}$  (400 MHz,  $\text{DMSO-}d_6$ )  $\delta$  171.69, 164.64,

164.33, 157.92, 150.98, 132.88, 131.27, 130.77, 130.42, 122.64, 120.12, 98.15. HRMS (ESI-TOF) m/z: [M+1] Calculated for C<sub>16</sub>H<sub>10</sub>BrN<sub>5</sub>OS<sub>2</sub>: 430.9510, found 433.9542.

### <sup>1</sup>H NMR

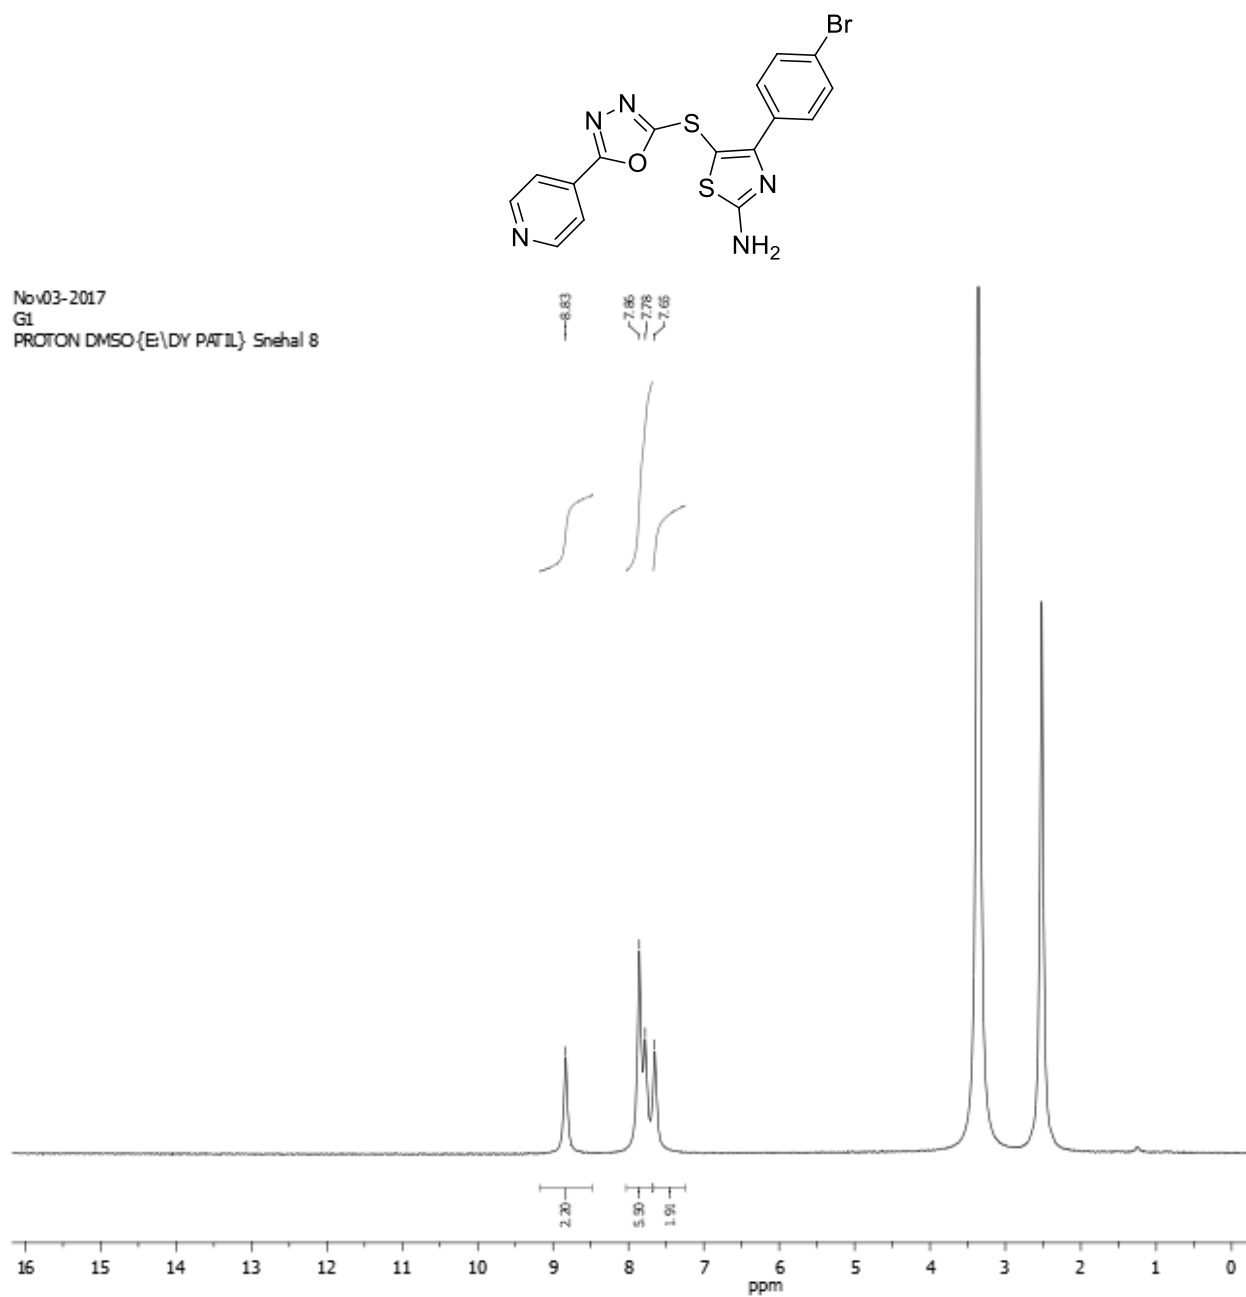

# <sup>13</sup>C NMR

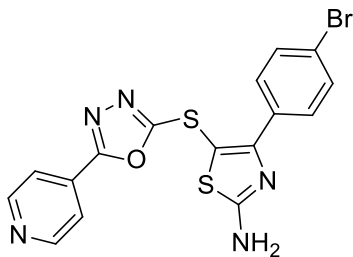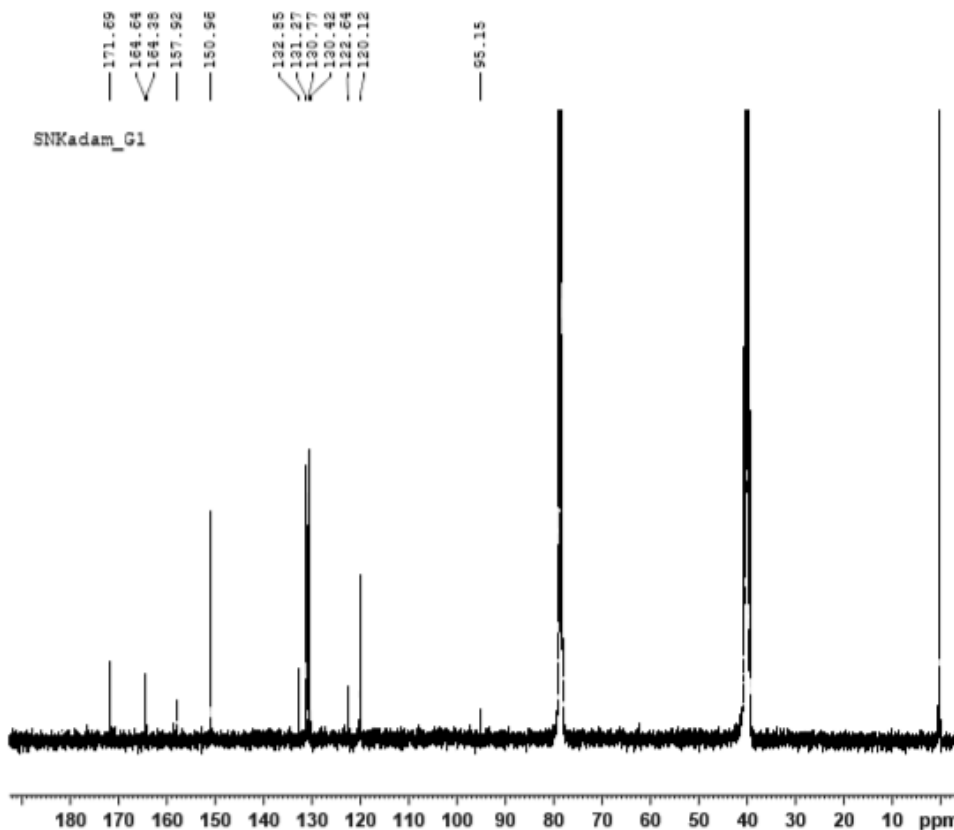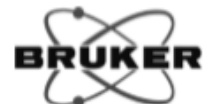

Current Data Parameters  
NAME SUB  
EXPNO 134  
PROCNO 1

F2 - Acquisition Parameters  
Date\_ 20171212  
Time 15.31 h  
INSTRUM spect  
PROBHD z106618\_0496 f  
PULPROG zgpg30  
TD 65536  
SOLVENT DMSO  
NS 4657  
DS 4  
SWH 24038.461 Hz  
FIDRES 0.733596 Hz  
AQ 1.3631488 sec  
RG 156.75  
DK 20.800 usec  
DE 6.50 usec  
TE 296.4 K  
D1 2.0000000 sec  
D11 0.0300000 sec  
TDO 1  
SFO1 100.6228298 MHz  
NUC1 13C  
P1 10.00 usec  
PLN1 54.0000000 W  
SFO2 400.1316005 MHz  
NUC2 1H  
CPDPRG2 waltz16  
PCPD2 50.00 usec  
PLN2 13.0000000 W  
PLN3 0.34351999 W  
PLN4 0.17279001 W

F2 - Processing parameters  
SI 32768  
SF 100.6127690 MHz  
WDW EM  
SSB 0  
LB 1.00 Hz  
GB 0  
PC 1.40

Instrument Expert

Dr. Makarand A. Kulkarni

## HRMS

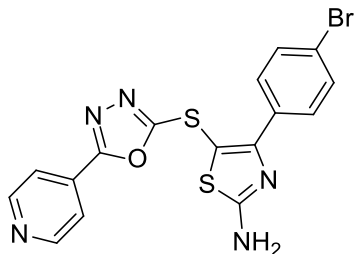

Calculated for  $C_{16}H_{10}BrN_5OS_2$ : 430.9510, found 433.9542.

G-1\_171214151629#281 RT: 1.26 AV: 1 NL: 4.33E8  
T: FTMS + p ESI Full ms [100.0000-1500.0000]

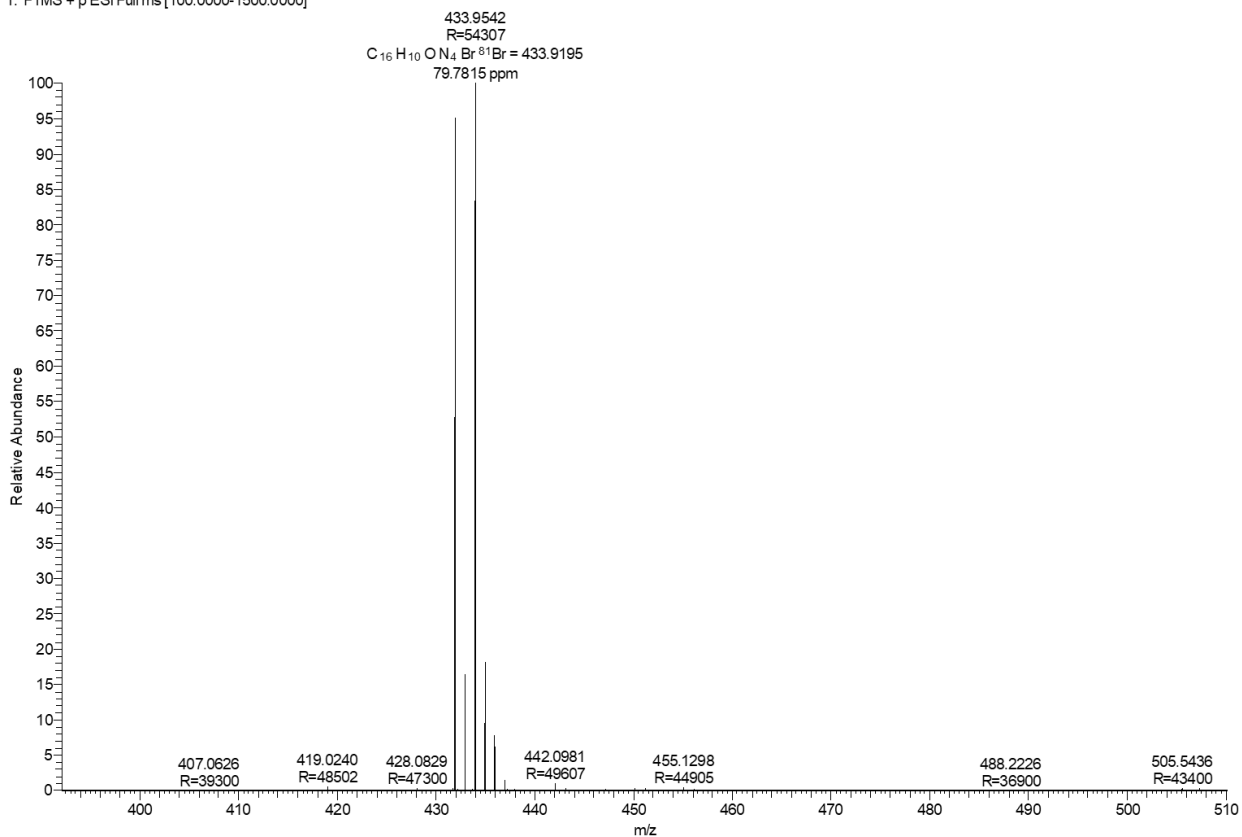

**(d) Spectral data of 5-((5-(pyridin-4-yl)-1,3,4-oxadiazol-2-yl)thio)-4-(p-tolyl)thiazol-2-amine (5g)** White solid, mp 118-119 °C.  $^1H$ -NMR (400 MHz, DMSO- $d_6$ )  $\delta$  8.81 (s, 2H), 7.81-7.71 (m, 6H), 7.23 (m, 2H), 2.31 (s, 3H).  $^{13}C$ -NMR (400 MHz, DMSO- $d_6$ )  $\delta$  171.48,

164.82, 164.56, 159.21, 151.41, 138.74, 131.12, 130.49, 129.21, 120.43, 93.91, 21.35.  
HRMS (ESI-TOF) m/z: [M+1] Calculated for C<sub>17</sub>H<sub>13</sub>N<sub>5</sub>OS<sub>2</sub>: 367.0562, found 368.0643.

### <sup>1</sup>H NMR

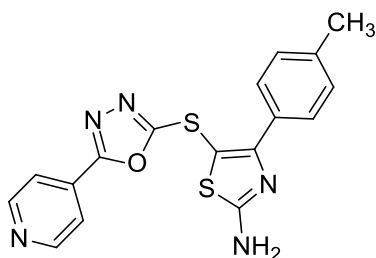

Shree ganesh  
G3  
1H

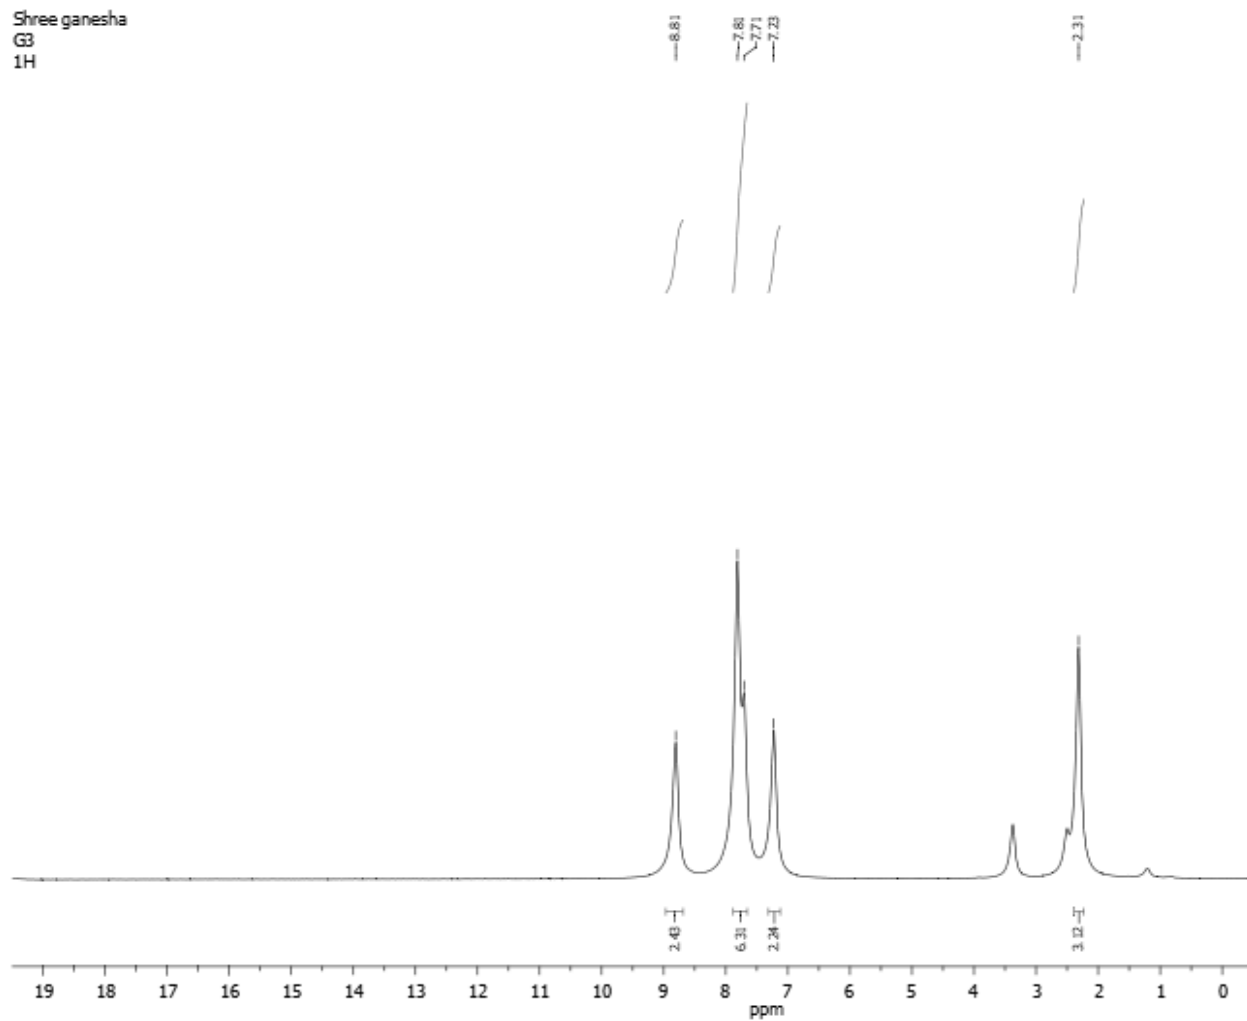

# <sup>13</sup>C NMR

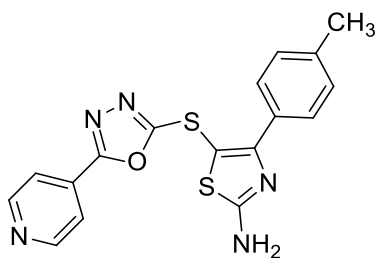

Shree ganesh  
G3  
13C

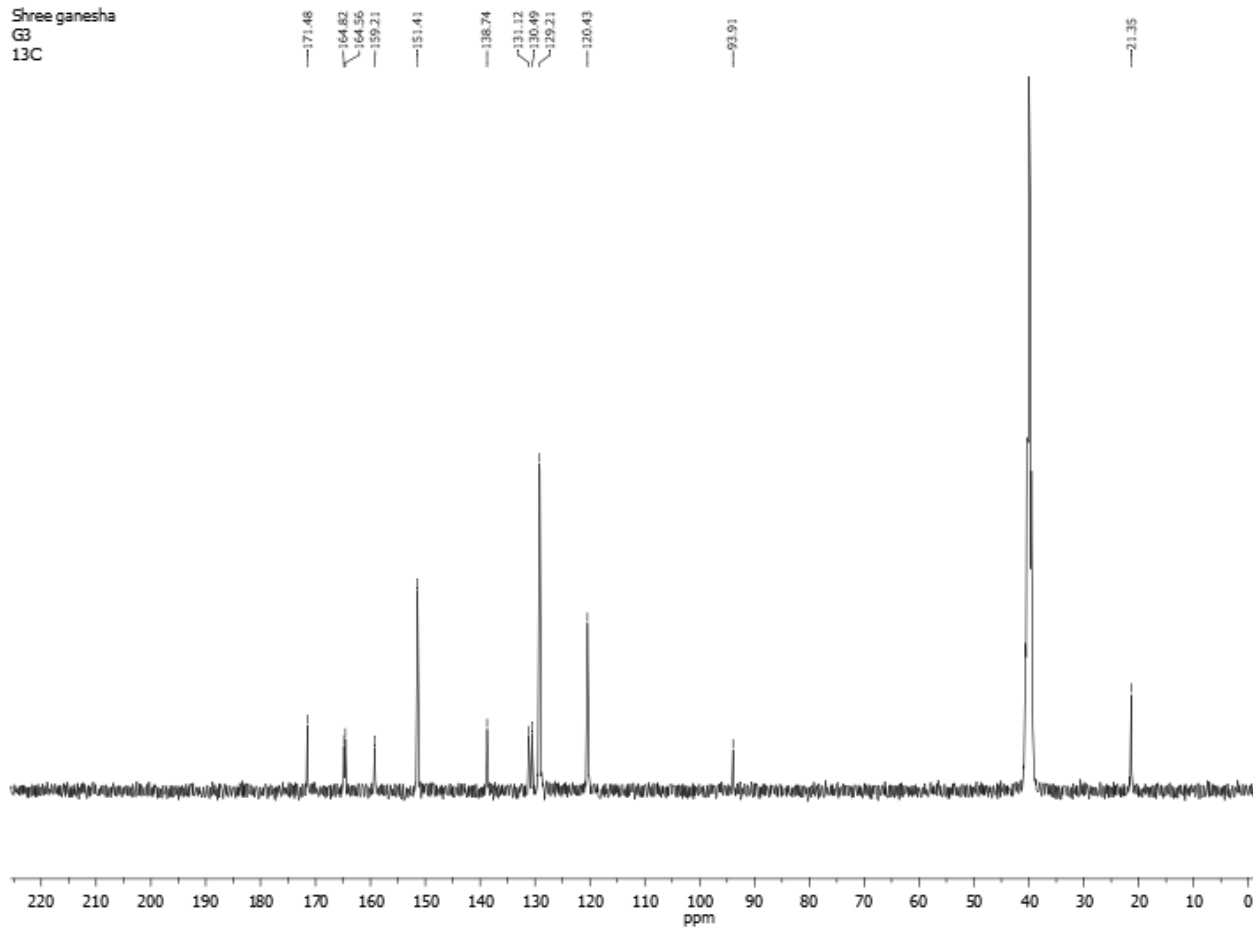

## HRMS

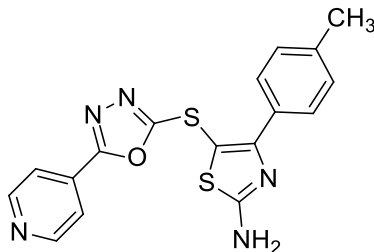

Calculated for C<sub>17</sub>H<sub>13</sub>N<sub>5</sub>OS<sub>2</sub>: 367.0562, found 368.0643.

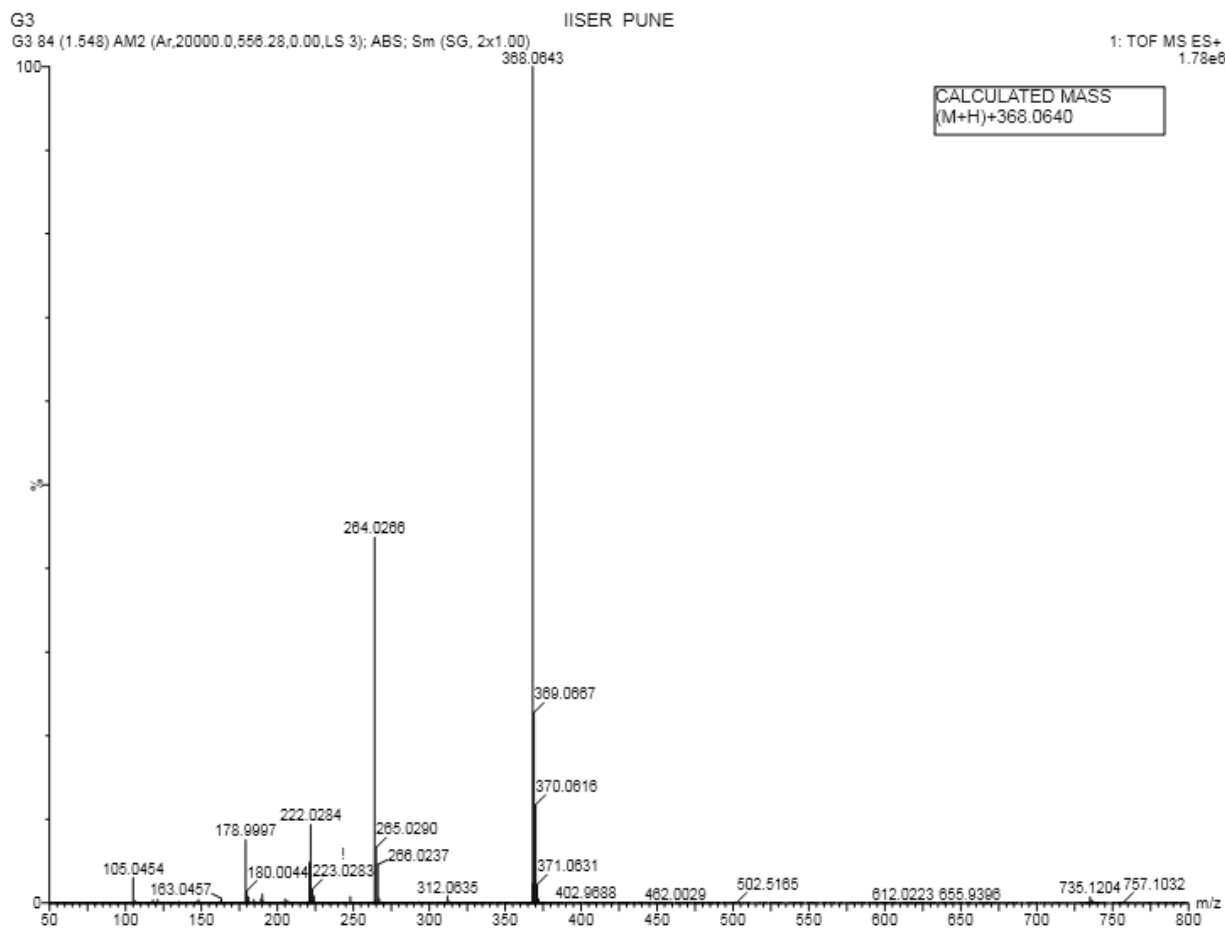

(e) Spectral data of 4-(4-fluorophenyl)-5-((5-(pyridin-4-yl)-1,3,4-oxadiazol-2-yl)thio)thiazol-2-amine (*5h*) White solid, mp 115-116 °C. <sup>1</sup>H-NMR (400 MHz, DMSO-*d*<sub>6</sub>) δ 8.82 (s, 2H), 7.83 (m, 6H), 7.28-7.27 (m, 2H). <sup>13</sup>C-NMR (400 MHz, DMSO-*d*<sub>6</sub>) δ





# <sup>13</sup>C NMR

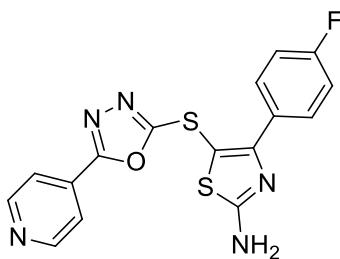

Shree ganesha  
13C  
G4

171.57  
164.67  
163.88  
156.04  
151.44  
131.48  
130.52  
130.35  
126.47  
115.73  
115.52  
94.54

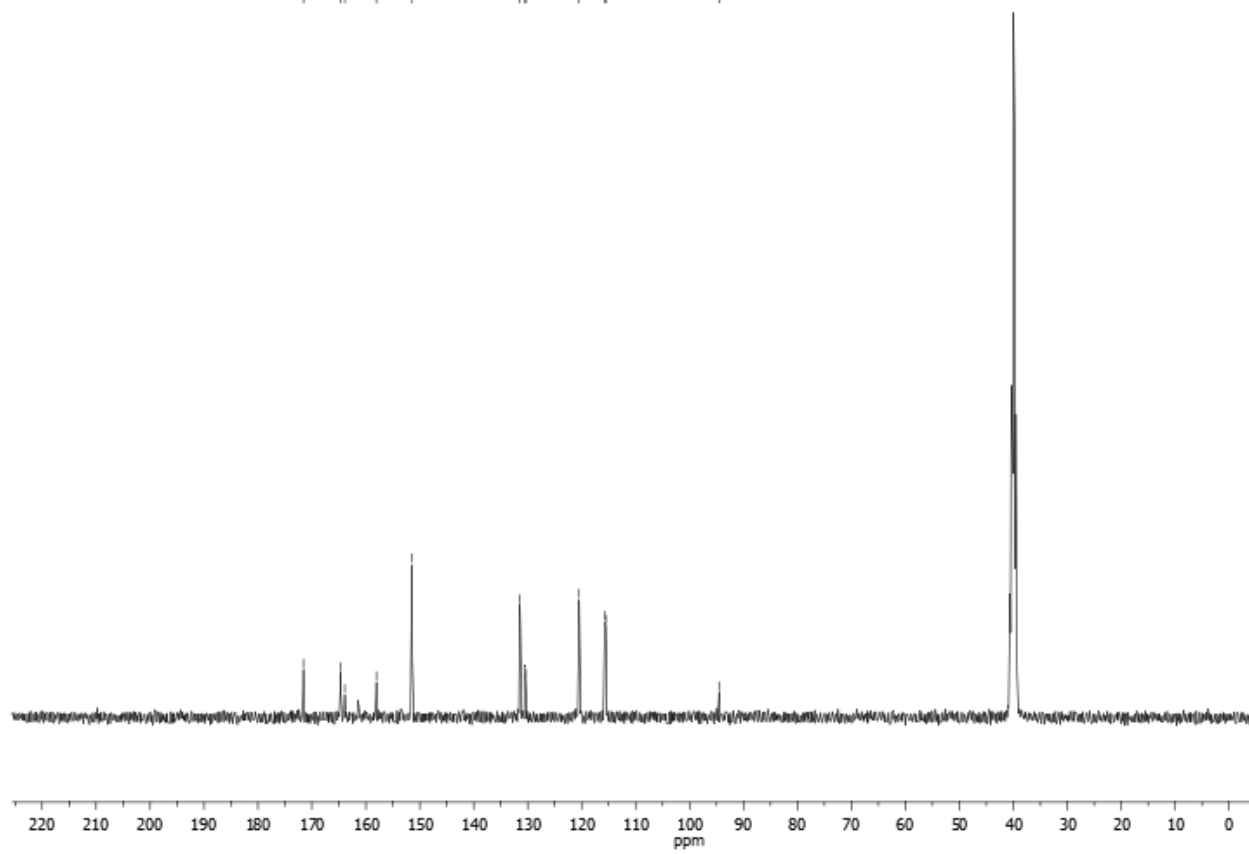

## HRMS

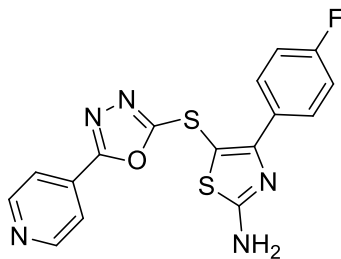

Calculated for  $C_{16}H_{10}FN_5OS_2$ : 371.0311, found 372.0392.

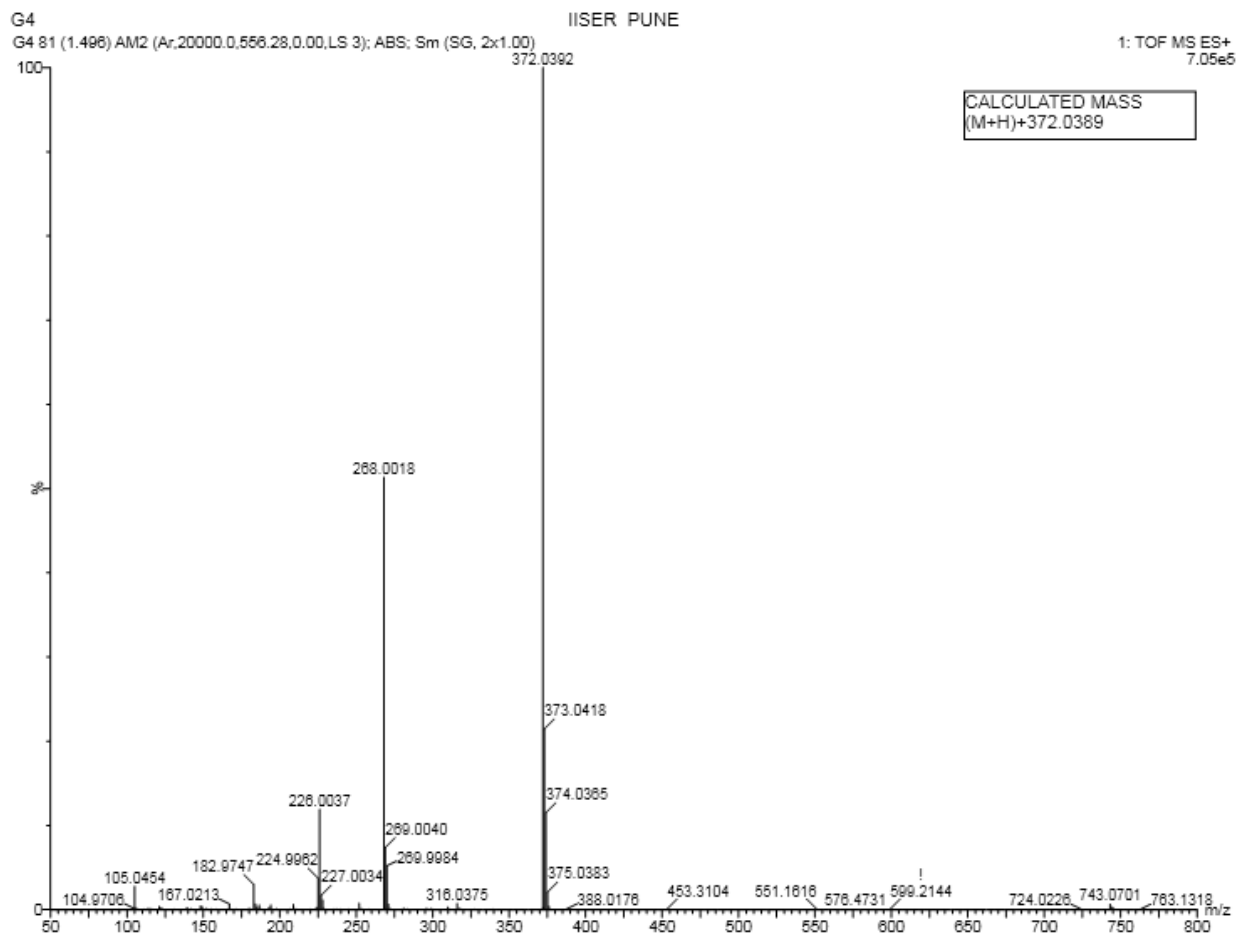

**(f) Spectral data of 4-phenyl-5-((5-(pyridin-4-yl)-1,3,4-oxadiazol-2-yl)thio)thiazol-2-amine (5i)** White solid, mp 110-112 °C.  $^1\text{H-NMR}$  (400 MHz,  $\text{DMSO-}d_6$ )  $\delta$  8.81 (s, 2H), 7.83-7.78 (m, 6H), 7.43-7.41 (m, 2H).  $^{13}\text{C-NMR}$  (400 MHz,  $\text{DMSO-}d_6$ )  $\delta$  171.57, 164.80,

164.60, 159.14, 133.82, 130.50, 129.21, 128.68, 120.48, 94.65. HRMS (ESI-TOF) m/z:  
[M+1] Calculated for C<sub>16</sub>H<sub>11</sub>N<sub>5</sub>OS<sub>2</sub>: 353.0405, found 354.0485.

### <sup>1</sup>H NMR

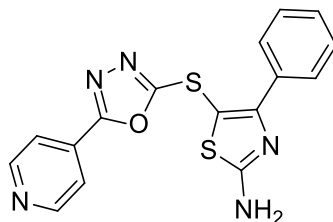

Shree ganesha  
G5  
1H

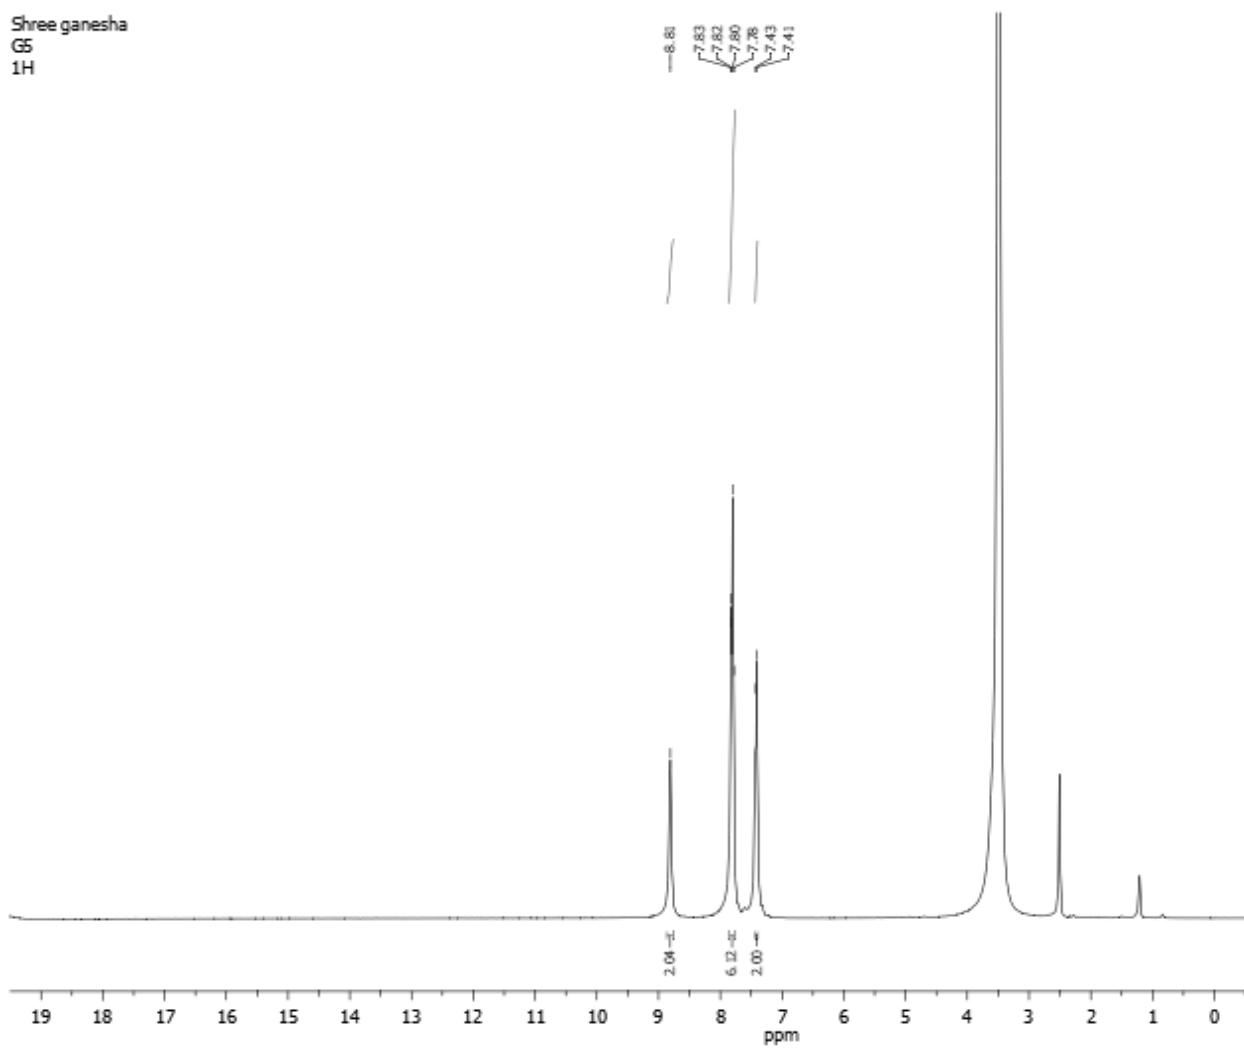

### <sup>13</sup>C NMR

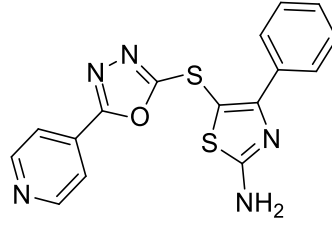

Shree ganesha  
13C

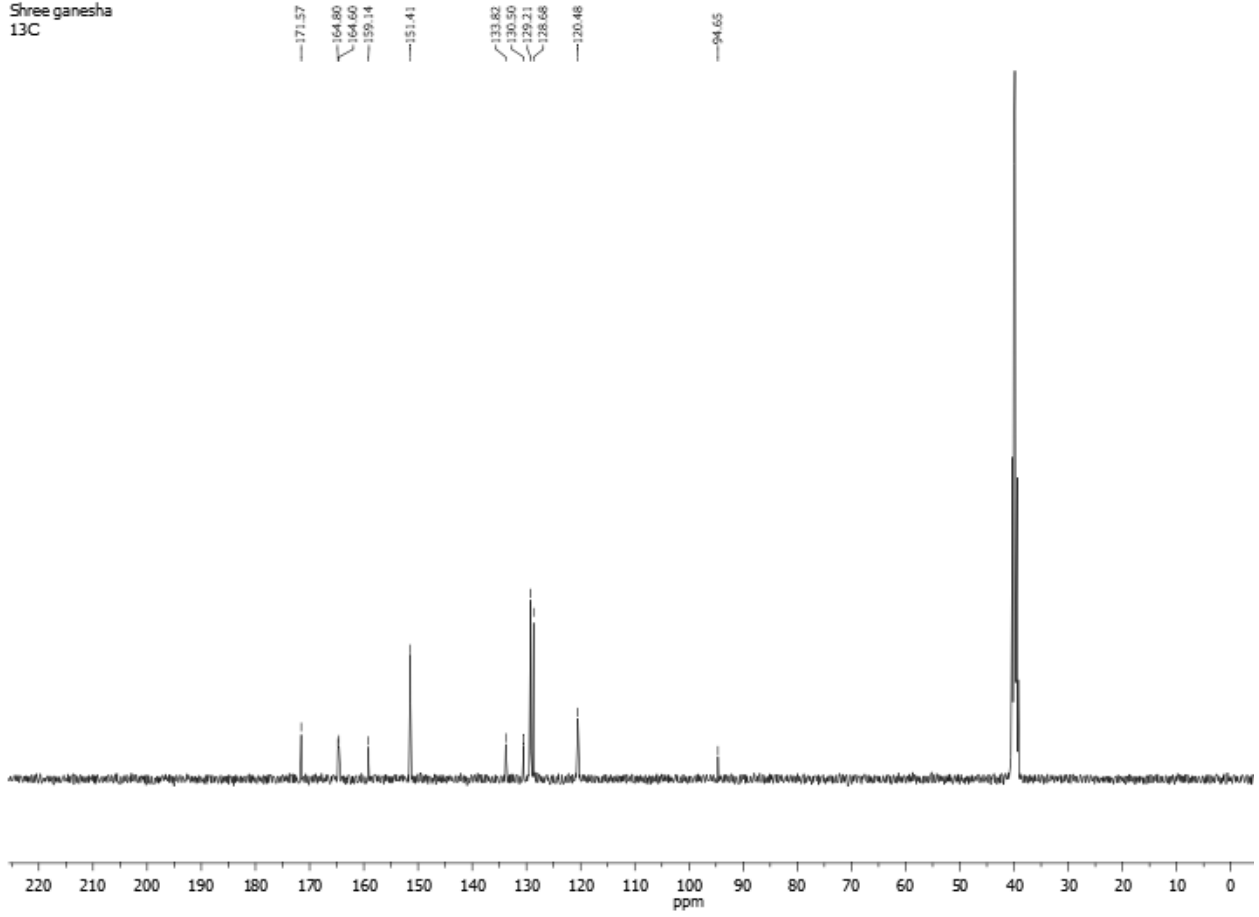

# HRMS

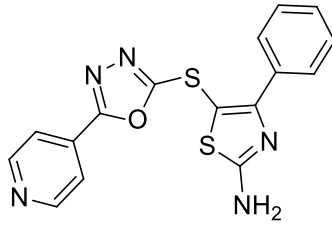

Calculated for  $C_{16}H_{11}N_5OS_2$ : 353.0405, found 354.0485.

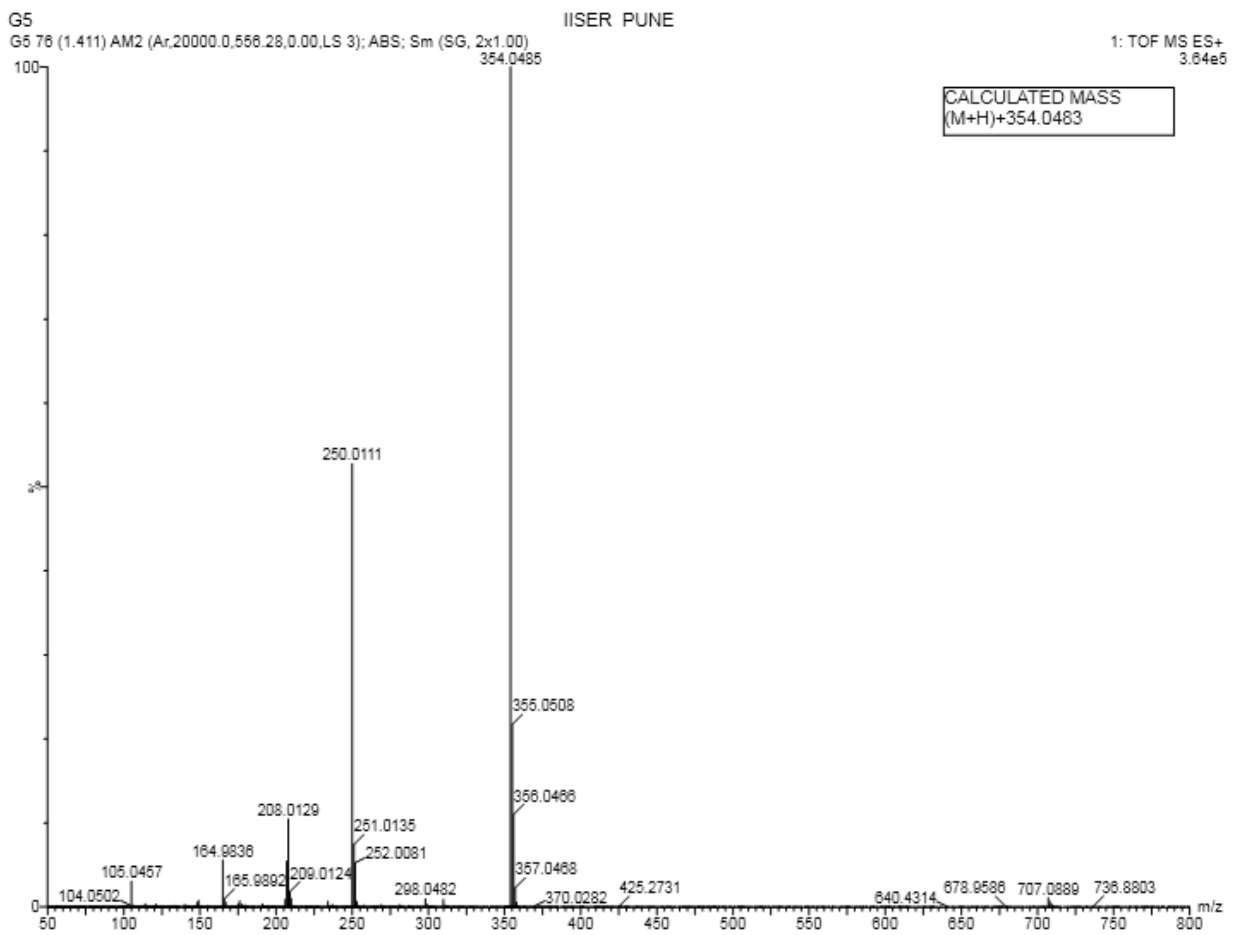

**3. Spectral data of 1-(6-(4-chlorophenyl)-3-methylimidazo[2,1-b]thiazol-2-yl)ethenone**

$^1\text{H}$  NMR (400 MHz,  $\text{DMSO-}d_6$ ):  $\delta$  8.54 (s, 1H, =C-H), 7.89-7.87 (dd, 2H, Ar-H), 7.80-7.47 (dd, 2H, Ar-H), 2.81 (s, 3H, - $\text{CH}_3$ ), 2.58 (s, 3H, - $\text{CH}_3$ ).  $^{13}\text{C}$  NMR (100 MHz,  $\text{DMSO-}d_6$ ):  $\delta$  190.77, 147.82, 147.25, 135.02, 132.87, 132.46, 128.84, 126.79, 125.24, 108.42, 29.73, 14.04.

$^1\text{H}$  NMR

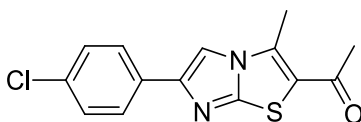

Z1 , 1H-DMSO-d6  
280517028

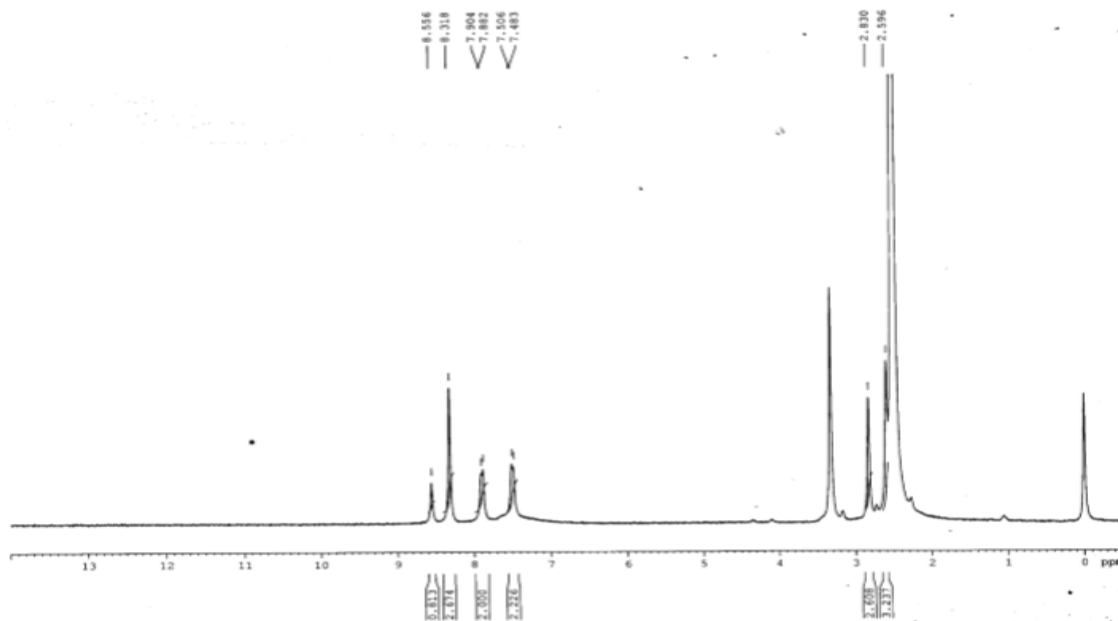

$^{13}\text{C}$  NMR

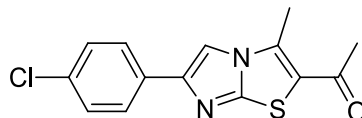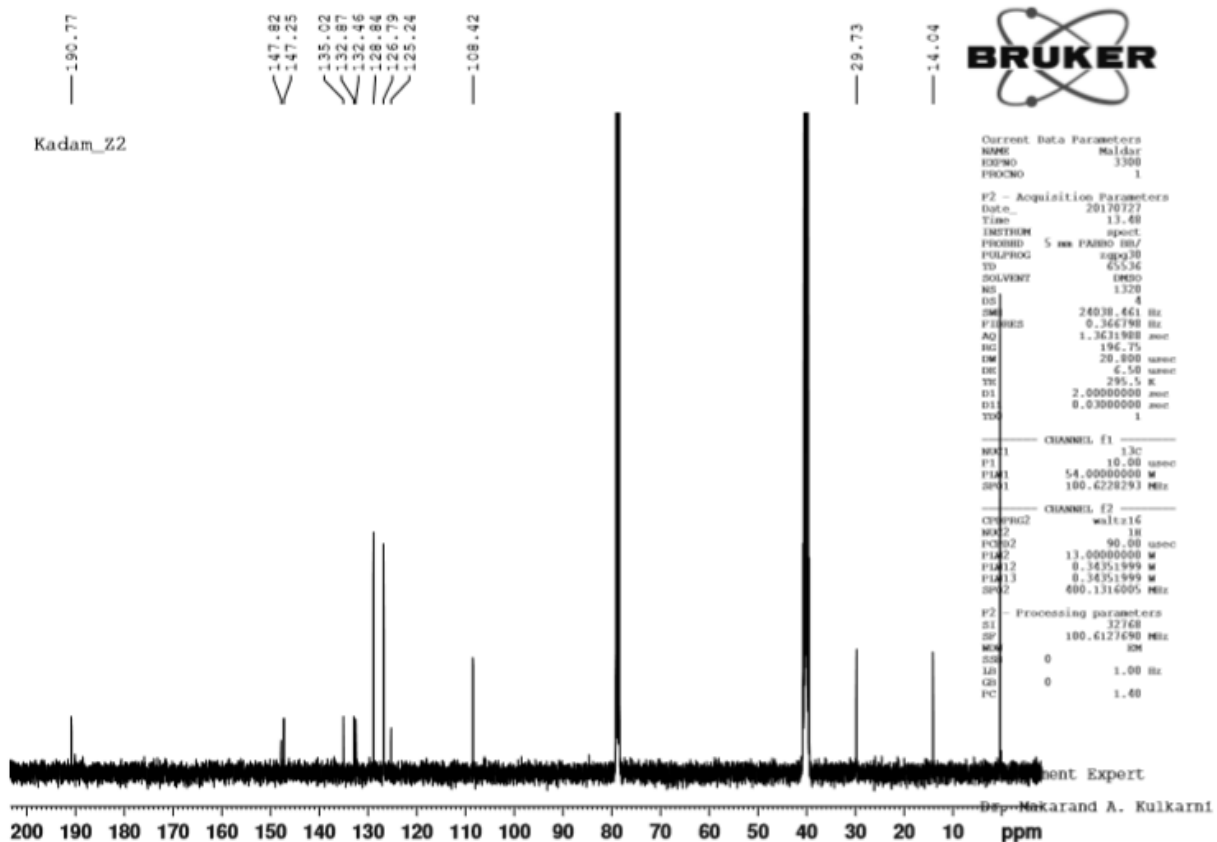

**4. a) General procedure for the synthesis of 1-(6-(4-chlorophenyl)-3- methylimidazo[2,1 b]thiazol-2-yl)ethanol (6a).**

For the synthesis of 1-(6-(4-chlorophenyl)-3-methylimidazo[2,1-b]thiazol-2-yl)ethanol (6a), 1-(6-(4-chlorophenyl)-3-methylimidazo[2,1-b]thiazol-2-yl)ethenone, (1mmol), was stirred in CH<sub>3</sub>OH at room temperature for 1-2 hours in presence of NaBH<sub>4</sub> (1.5mmol) as reducing agent. After completion of reaction (monitored by TLC), the



reaction mass was poured in ice cold water and neutralized with dilute HCl. The solid separated was filtered, dried and washed with cold methanol to furnish product as white amorphous solid.

**b) Spectral data of 1-(6-(4-chlorophenyl)-3-methylimidazo[2,1-b]thiazol-2-yl)ethanol (6a).** white solid, mp 100-101 °C. <sup>1</sup>H NMR (400 MHz, DMSO-*d*<sub>6</sub>): δ 8.25 (s, 1H =C-H), 7.85 (s, 2H, Ar-H), 7.45 (s, 2H, Ar-H), 5.75 (s, 1H, >C-H), 5.08 (s, 1H, -OH), 2.38 (s, 3H, -CH<sub>3</sub>), 1.38 (s, 3H, -CH<sub>3</sub>). <sup>13</sup>C NMR (100 MHz, DMSO-*d*<sub>6</sub>): δ 147.69, 144.75, 133.43, 131.96, 131.35, 128.72, 126.42, 122.07, 107.33, 62.47, 25.15, 11.61. HRMS (ESI-TOF) m/z: [M+1] Calculated for C<sub>14</sub>H<sub>13</sub>ClN<sub>2</sub>OS: 292.0437, found 293.0522.

<sup>1</sup>H NMR

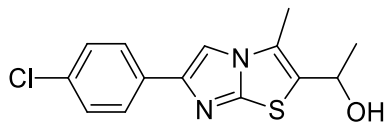

Y1, <sup>1</sup>H-DMSO-d6  
300517003

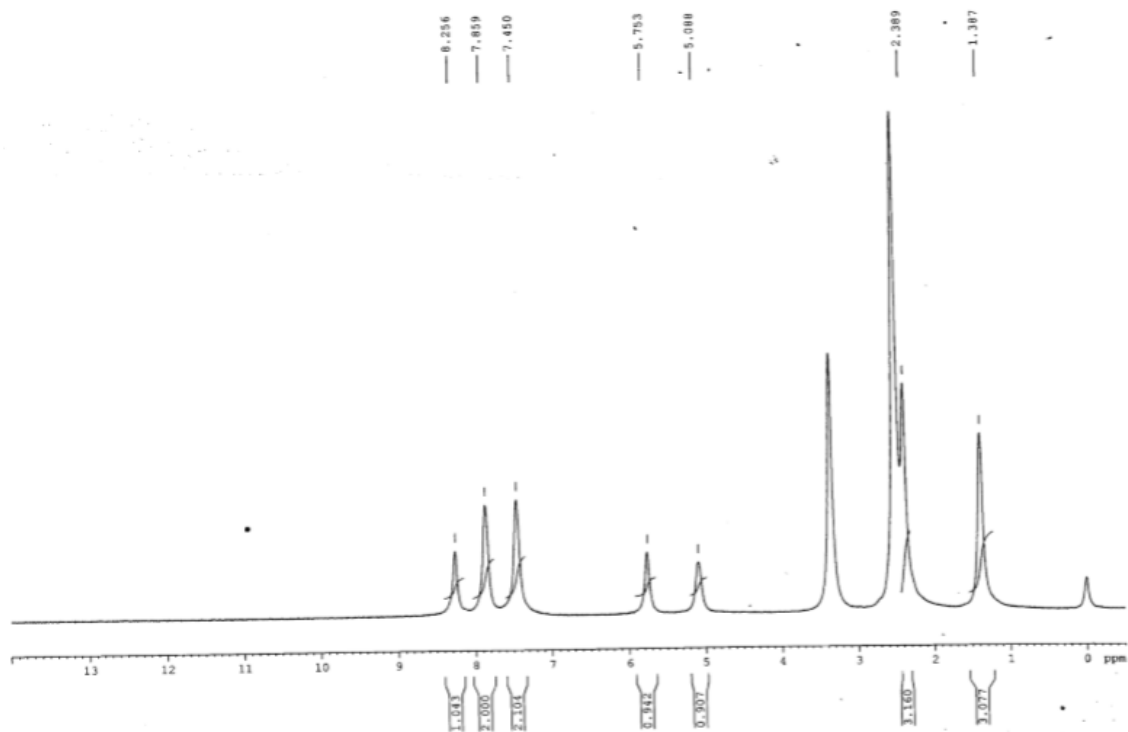

<sup>13</sup>C NMR

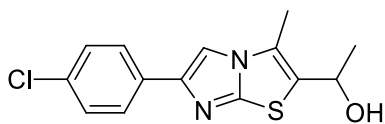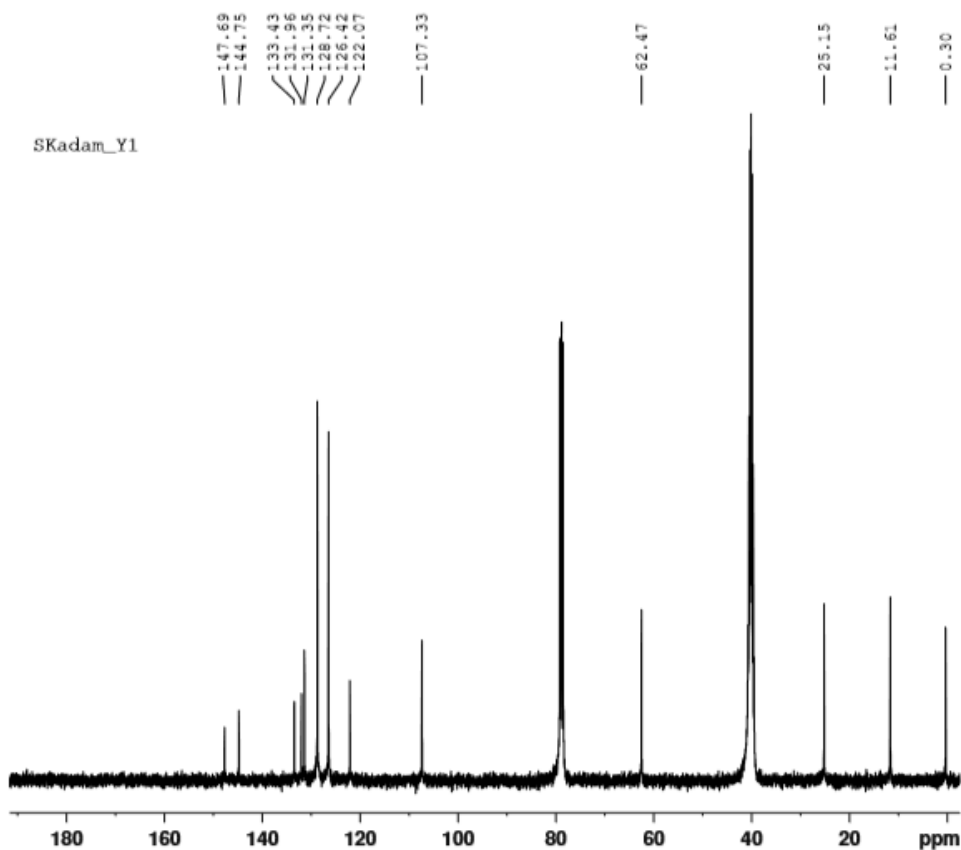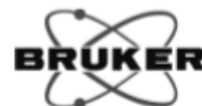

Current Data Parameters  
NAME: Msdar  
EXPNO: 3324  
PROCNO: 1

F2 - Acquisition Parameters  
Date\_: 20170728  
Time: 16.14  
INSTRUM: spect  
PROBHD: 5 mm PABBO BH/  
PULPROG: zgpg30  
TD: 65536  
SOLVENT: DMSO  
NS: 1646  
DS: 4  
SWH: 24038.461 Hz  
FIDRES: 0.366798 Hz  
AQ: 1.3631988 sec  
RG: 196.75  
DW: 20.800 usec  
DE: 6.50 usec  
TE: 299.2 K  
D1: 2.0000000 sec  
D11: 0.0300000 sec  
TD0: 1

CHANNEL F1  
NUC1: 13c  
P1: 10.00 usec  
PLW1: 54.0000000 W  
SFO1: 100.6228293 MHz

CHANNEL F2  
CPDPRG2: waltz16  
NUC2: 1H  
PCPD2: 90.00 usec  
PLW2: 13.0000000 W  
PLW3: 0.34351999 W  
PLW4: 0.34351999 W  
SFO2: 400.1316005 MHz

F2 - Processing parameters  
SI: 32768  
SF: 100.6227690 MHz  
WDW: EM  
SSB: 0  
LB: 1.00 Hz  
GB: 0  
PC: 1.40

Instrument Expert  
Dr. Makarand A. Kulkarni

HRMS

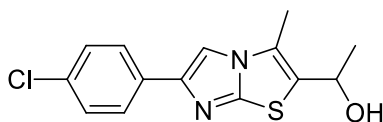

Calculated for C<sub>14</sub>H<sub>13</sub>ClN<sub>2</sub>OS: 292.0437, found 293.0522.

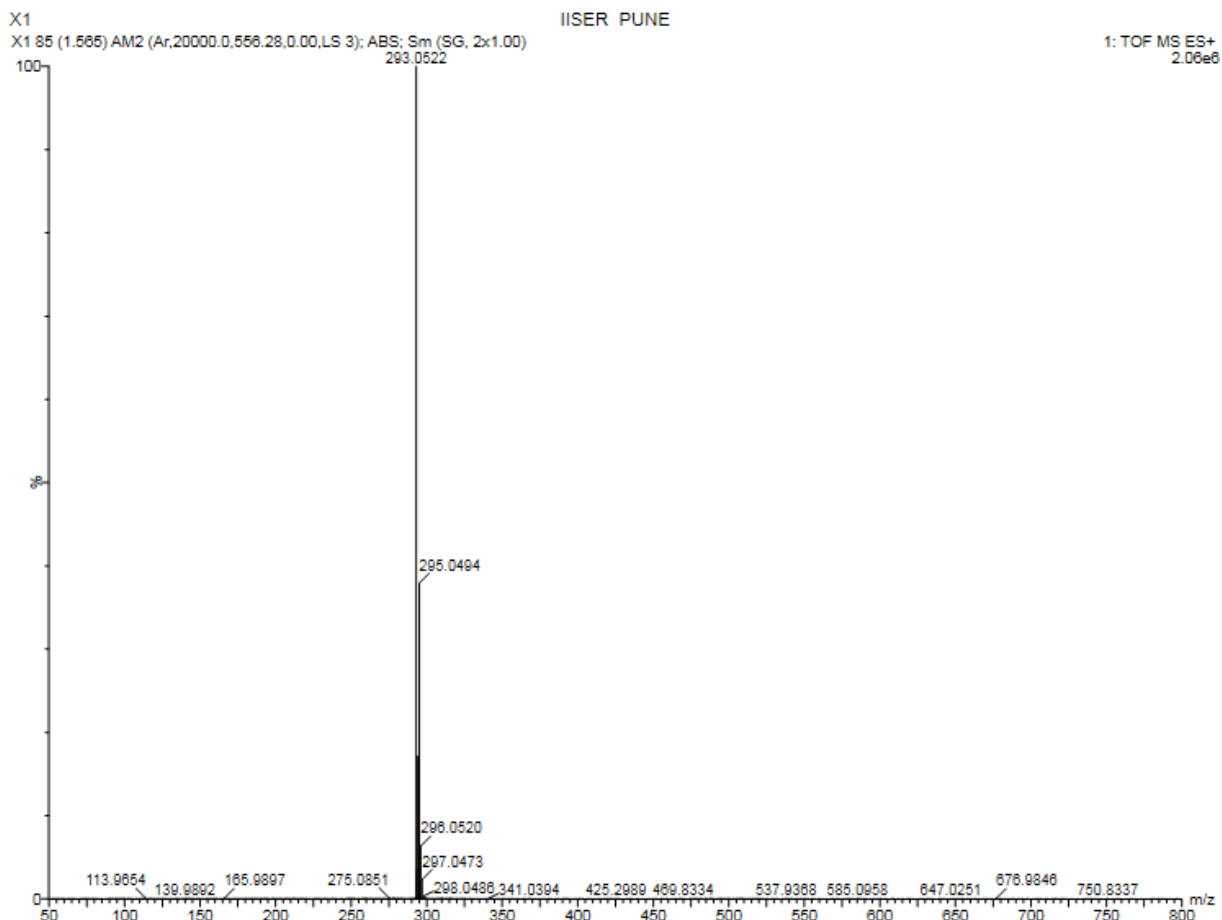

5. a) **General procedure for the synthesis of 1-(5-((1H-benzo[d]imidazol-2-yl)thio)-6-(4-chlorophenyl)-3-methylimidazo[2,1-b]thiazol-2-yl)ethanol (7a).**

NCS (1.5 mmol) was taken in round bottom flask containing CH<sub>3</sub>OH. To this same pot 1H-benzo[d]imidazole-2-thiol (**2a**) (**Scheme 2**) (2 mmol) was added slowly with constant stirring, and reaction mass was stirred at room temperature up to 5 minutes. As TLC indicate the formation of (NHTS). Furthermore to the same pot 1-(6-(4-chlorophenyl)-3-methylimidazo[2,1-b]thiazol-2-yl)ethanol (2 mmol), was added with small proportions at a time and stirring was continued for another 20 minutes, as TLC indicate the completion of reaction. The reaction mass was poured on ice cold water, solid

product separated out was filtered, dried and washed with aqueous ethanol. No further purification like column chromatography was needed.

**b) Spectral data of 1-(5-((1H-benzo[d]imidazol-2-yl)thio)-6-(4-chlorophenyl)-3**

*methylimidazo[2,1-b]thiazol-2-yl)ethanol (7a)*. white solid, mp 111-113 °C. FT-IR: 3177 (-OH), 1128 (C-S-C)  $\text{cm}^{-1}$ .  $^1\text{H-NMR}$  (400 MHz,  $\text{DMSO-}d_6$ )  $\delta$  12.63 (s, 1H), 7.93 (dd, 2H), 7.48 (m, 3H), 7.37 (s, 1H), 7.93 (dd, 2H), 5.86 (d, 1H), 5.07 (q, 1H), 2.46 (s, 3H), 1.37 (d, 3H).  $^{13}\text{C-NMR}$  (400 MHz,  $\text{DMSO-}d_6$ )  $\delta$  152.12, 151.64, 149.92, 144.40, 135.71, 133.56, 133.02, 132.31, 129.55, 128.45, 124.86, 122.18, 121.79, 118.09, 111.04, 103.89, 62.24, 25.13, 12.13. HRMS (ESI-TOF)  $m/z$ :  $[\text{M}+1]$  Calculated for  $\text{C}_{21}\text{H}_{17}\text{ClN}_4\text{OS}_2$ : 440.0532, found 441.7851.

**IR Spectra**

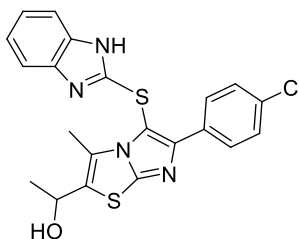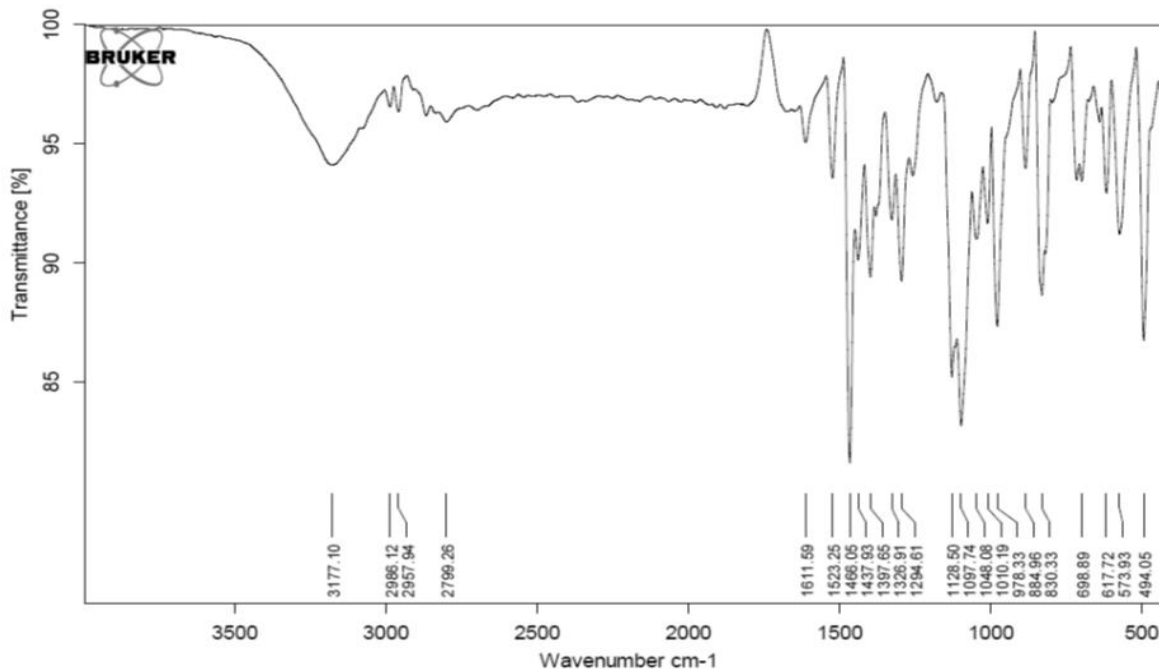

# <sup>1</sup>H NMR

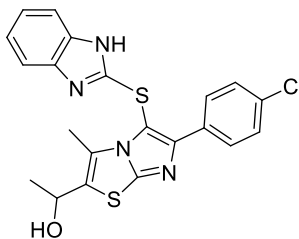

Q1, 1H-DMSO-d6  
030917036

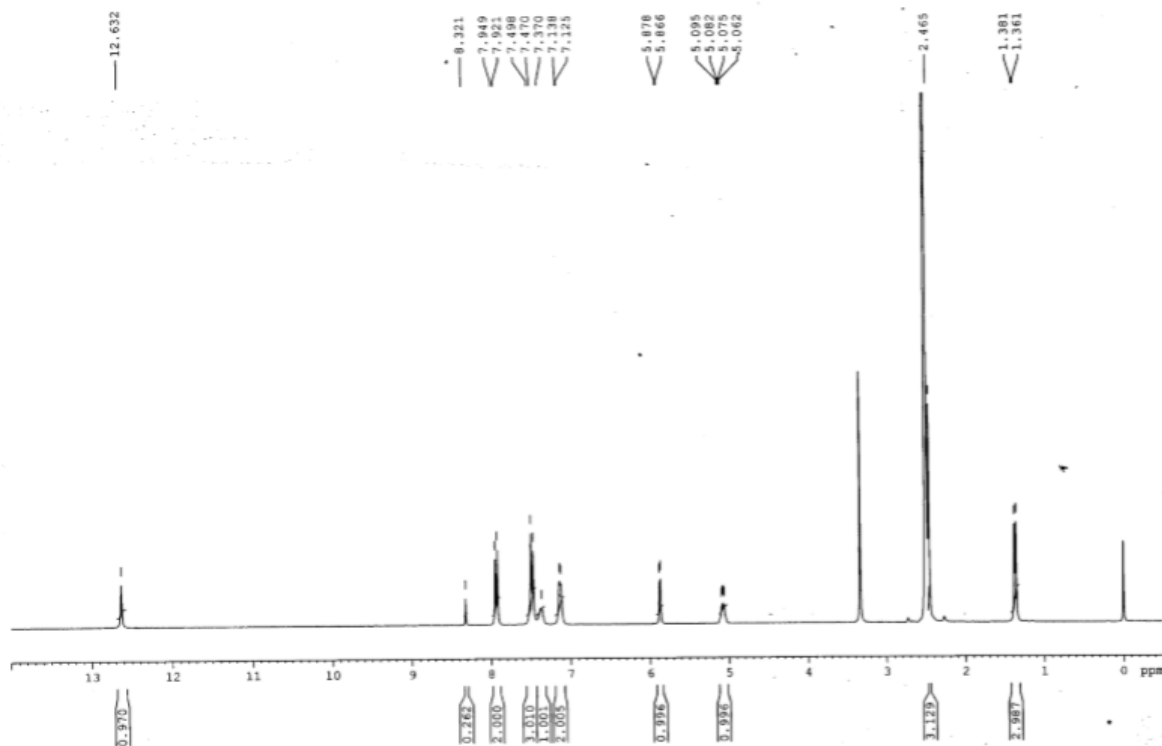

<sup>13</sup>C NMR

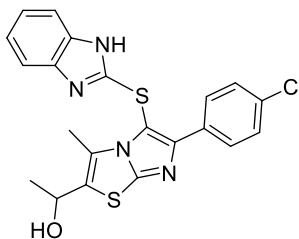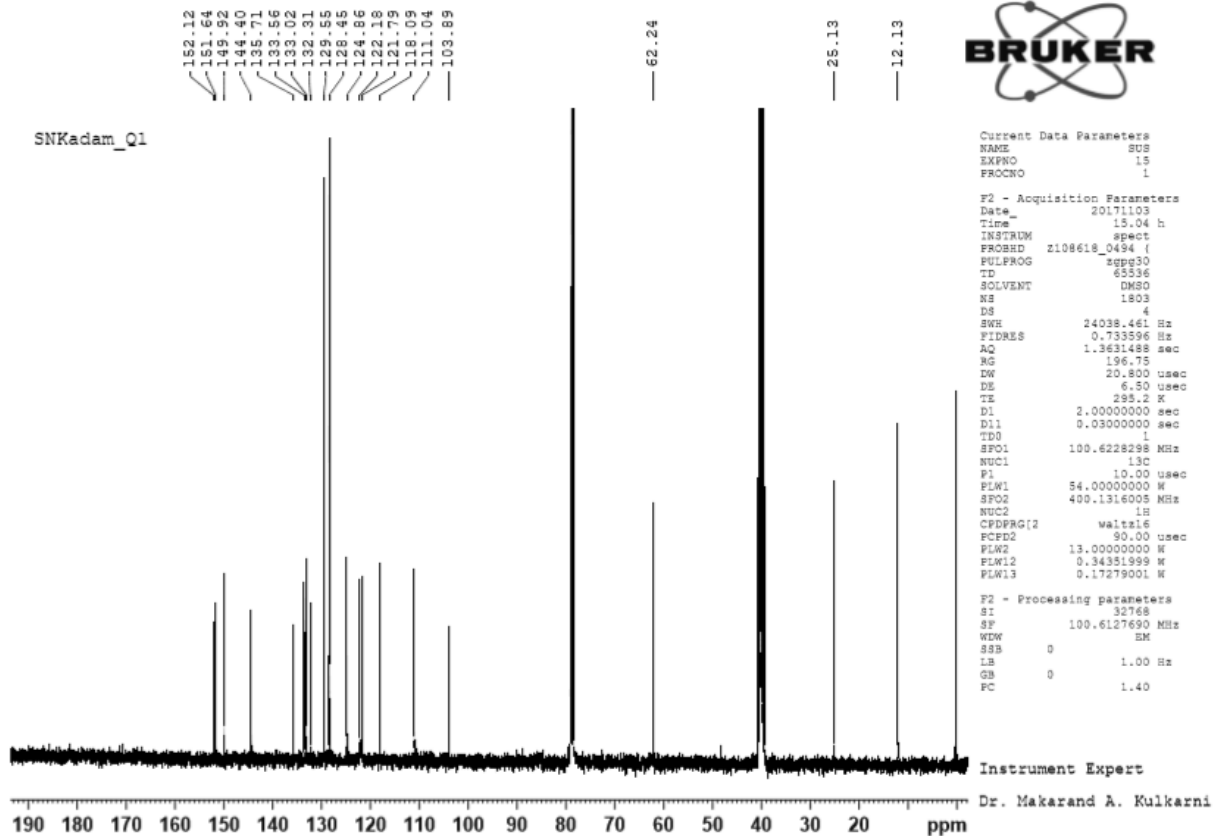

## HRMS

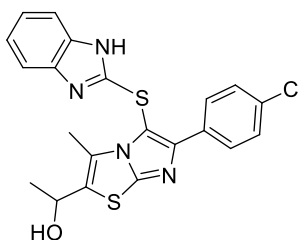

Calculated for  $C_{21}H_{17}ClN_4OS_2$ : 440.0532, found 441.7851.

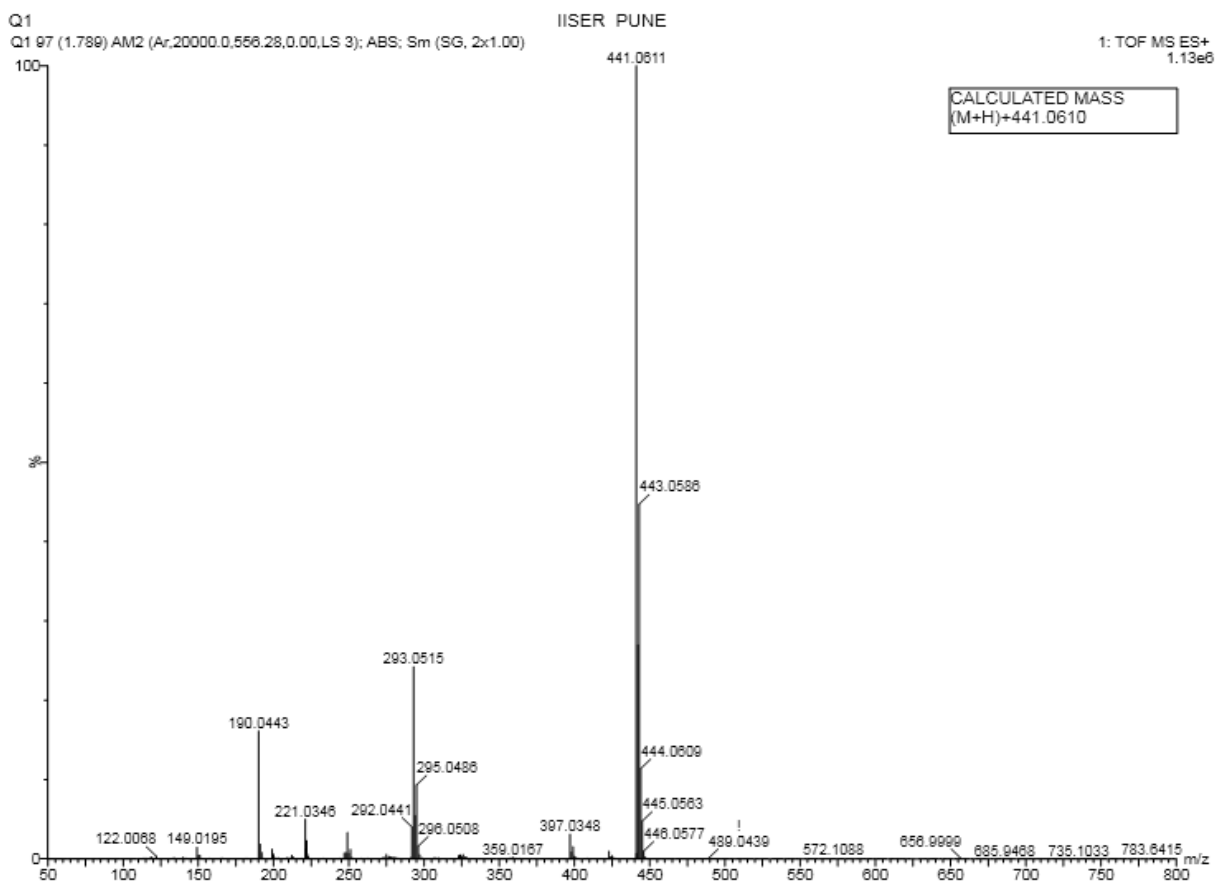

(c) Spectral data of *1-(5-((1H-benzo[d]imidazol-2-yl)thio)-3-methyl-6-phenylimidazo[2,1-b]thiazol-2-yl)ethanol (7b)*. White solid, mp 115-117 °C. FT-IR: 3040 (-OH), 1146 (C-S-C)  $cm^{-1}$ .  $^1H$ -NMR (400 MHz, DMSO- $d_6$ )  $\delta$  12.60 (s, 1H), 7.89 (dd, 2H), 7.40 (m, 5H), 7.13 (m, 2H), 5.87 (s, 1H), 5.08 (m, 1H), 2.47 (s, 3H), 1.37 (d, 3H).  $^{13}C$ -NMR



(400 MHz, DMSO-*d*<sub>6</sub>)  $\delta$  153.02, 152.11, 150.38, 133.57, 132.68, 128.32, 128.20, 128.16, 124.91, 121.93, 103.43, 62.28, 25.08, 12.13. HRMS (ESI-TOF) *m/z*: [M+1] Calculated for C<sub>21</sub>H<sub>18</sub>N<sub>4</sub>OS<sub>2</sub>: 406.0922, found 407.0988.

## IR

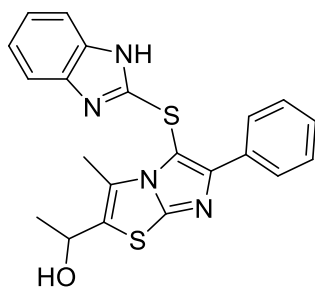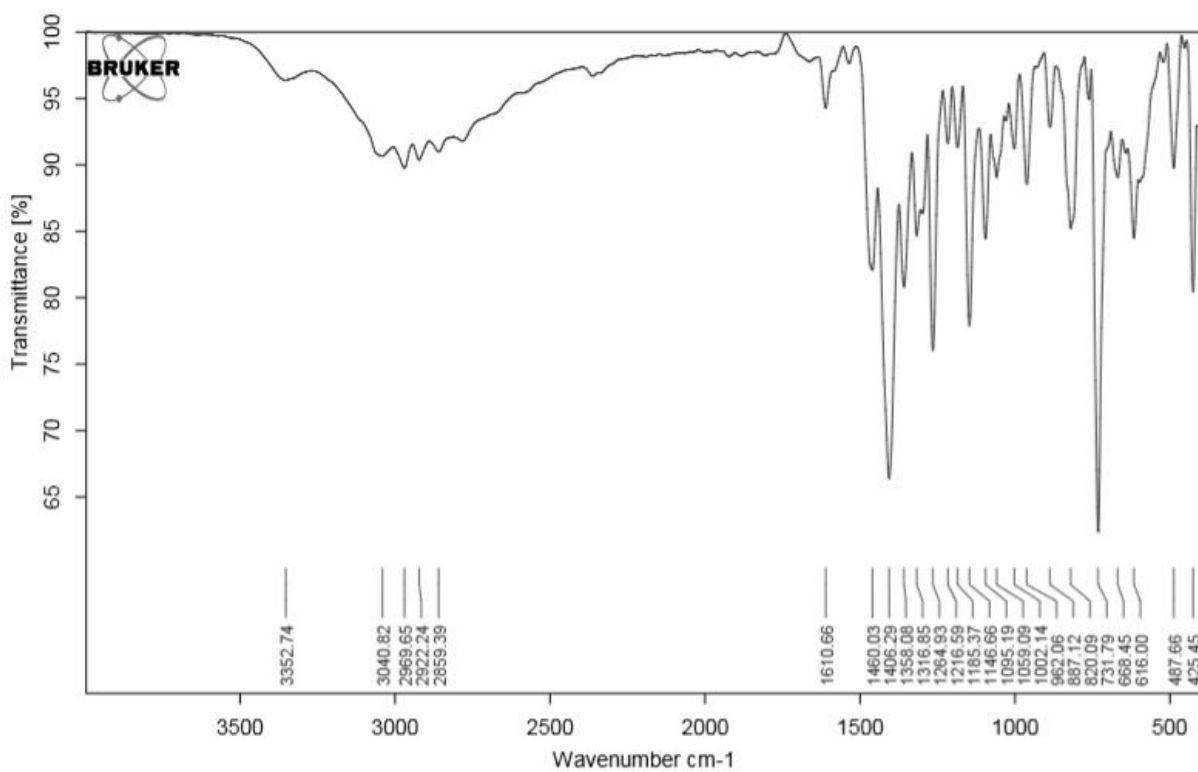

# <sup>1</sup>H NMR

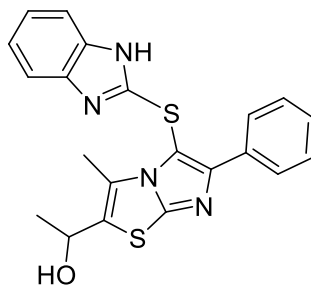

Q2, 1H-DMSO-d6  
221017022

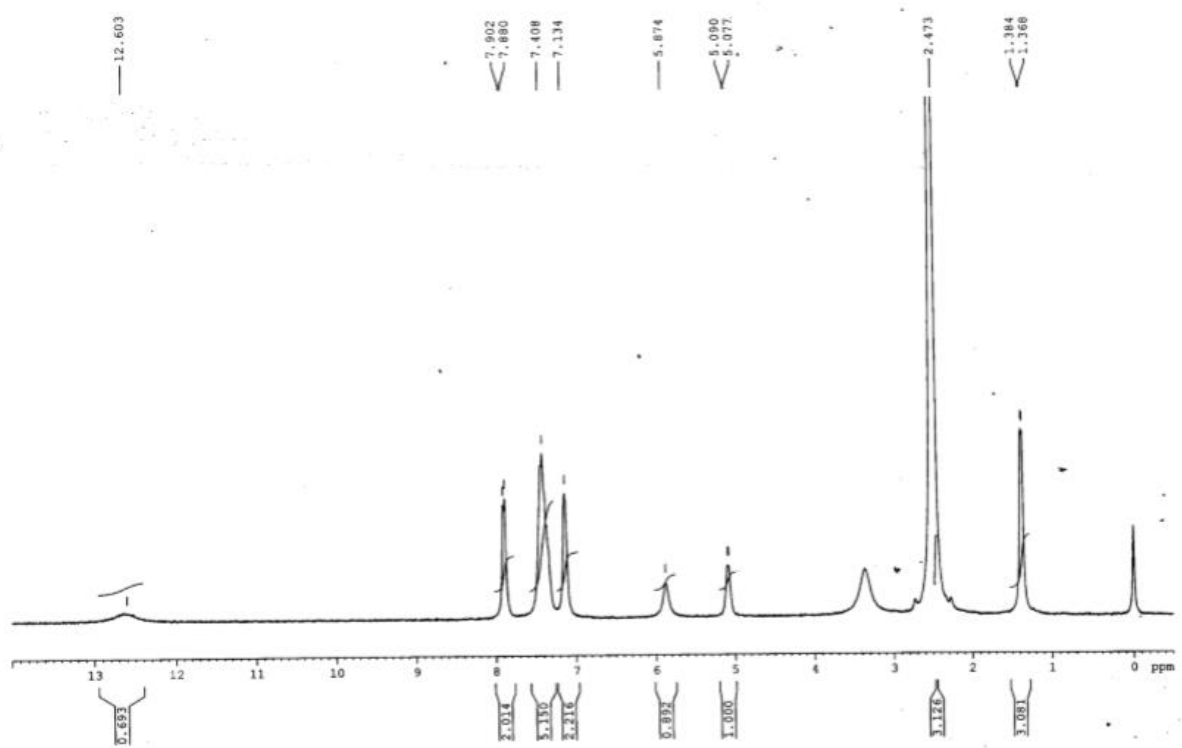

# <sup>13</sup>C NMR

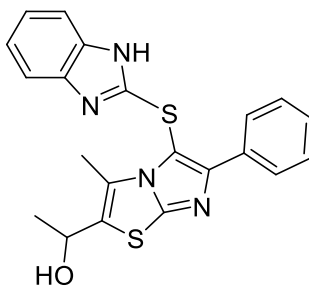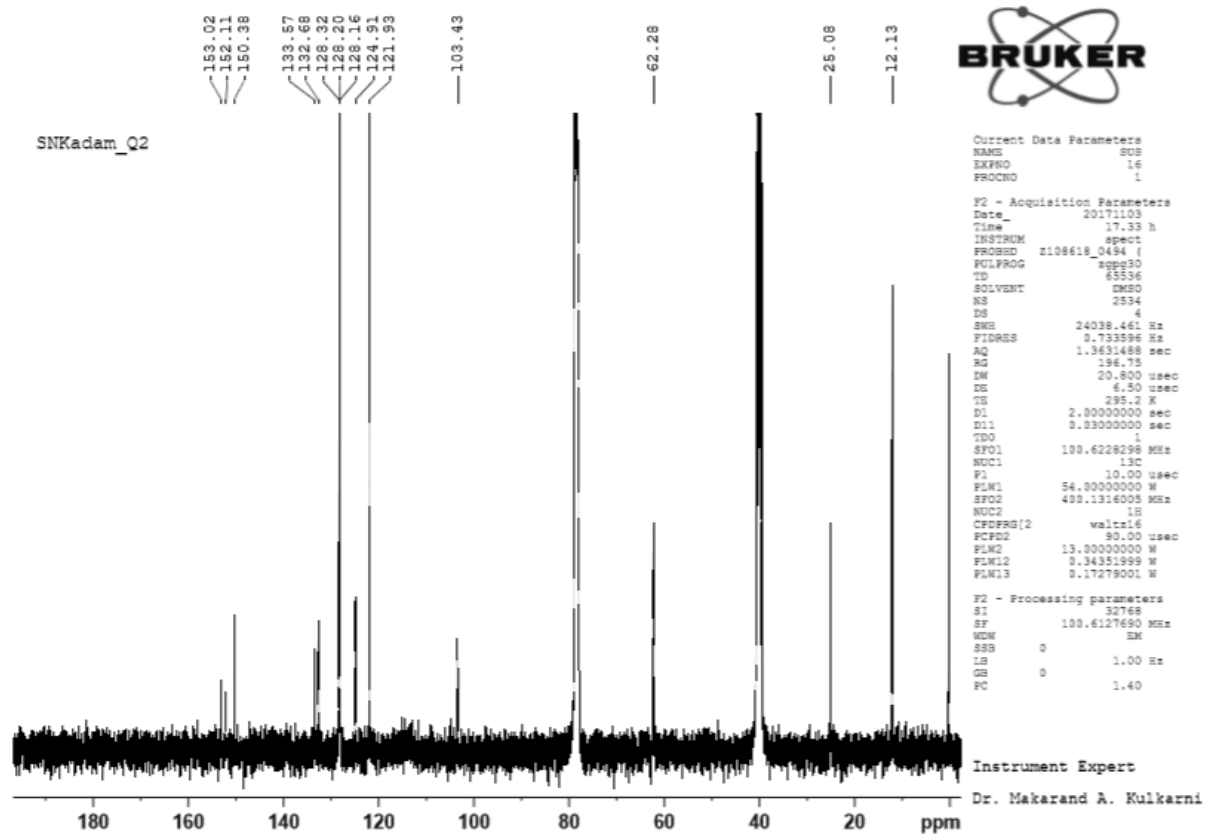

## HRMS

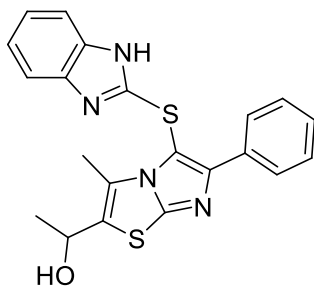

Calculated for  $C_{21}H_{18}N_4OS_2$ : 406.0922, found 407.0988.

Q-2 #300 RT: 1.34 AV: 1 NL: 6.76E8  
T: FTMS + p ESI Fullms [100.0000-1500.0000]

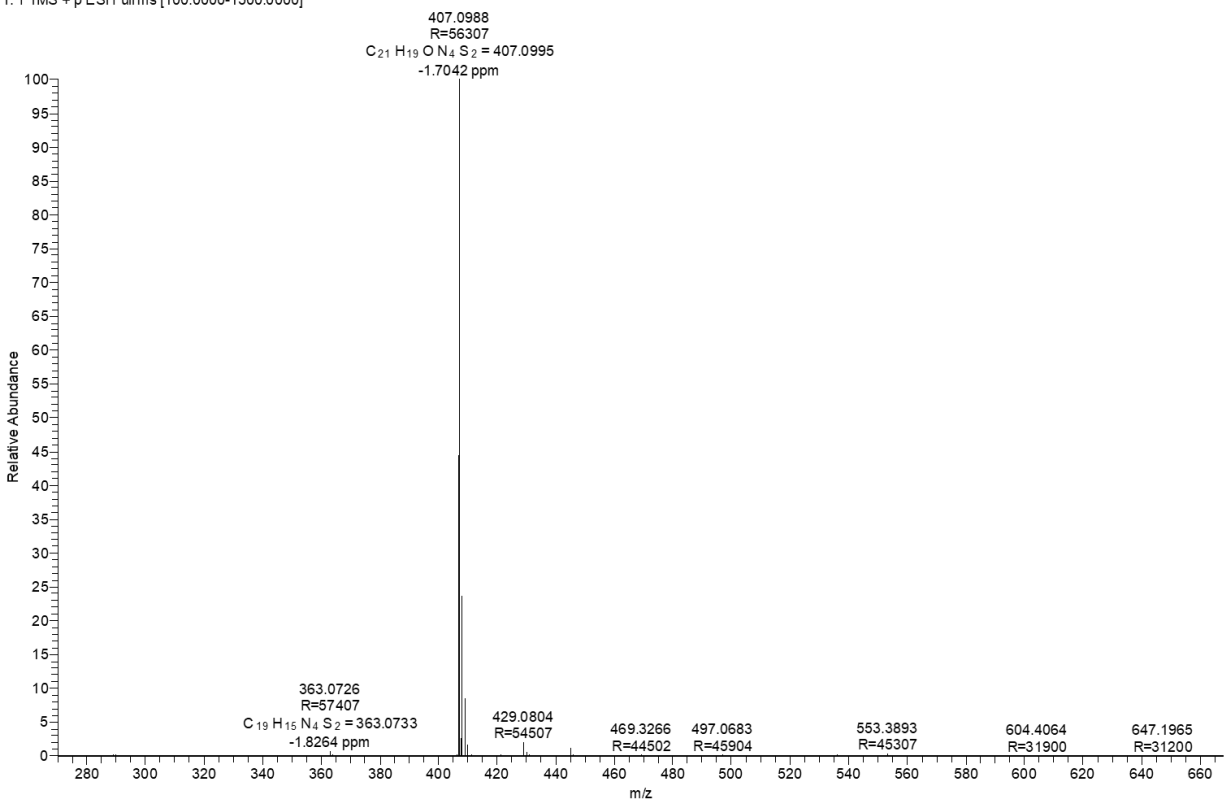

(d) Spectral data of *1-(5-((1H-benzo[d]imidazol-2-yl)thio)-6-(4-bromophenyl)-3-methylimidazo[2,1-b]thiazol-2-yl)ethanol (7c)*. White solid, mp 120-121 °C.  $^1\text{H-NMR}$  (400 MHz,  $\text{DMSO-}d_6$ )  $\delta$  12.63 (s, 1H), 7.89-7.87 (dd, 2H), 7.63-7.61 (dd, 2H), 7.52-7.50 (m, 1H), 7.38-7.37 (m, 1H), 7.15-7.12 (m, 2H), 5.88-5.87 (dd, 1H), 5.10-5.07 (q, 1H), 2.47 (s, 3H), 1.39-1.37 (d, 3H).  $^{13}\text{C-NMR}$  (400 MHz,  $\text{DMSO-}d_6$ )  $\delta$  151.74, 151.32, 149.94, 133.38, 132.99, 131.80, 130.11,

124.96, 122.02, 121.97, 104.42, 62.12, 25.47, 12.10. HRMS (ESI-TOF) m/z: [M+1] Calculated for C<sub>21</sub>H<sub>17</sub>BrN<sub>4</sub>OS<sub>2</sub>: 484.0027, found 485.0103.

### <sup>1</sup>H NMR

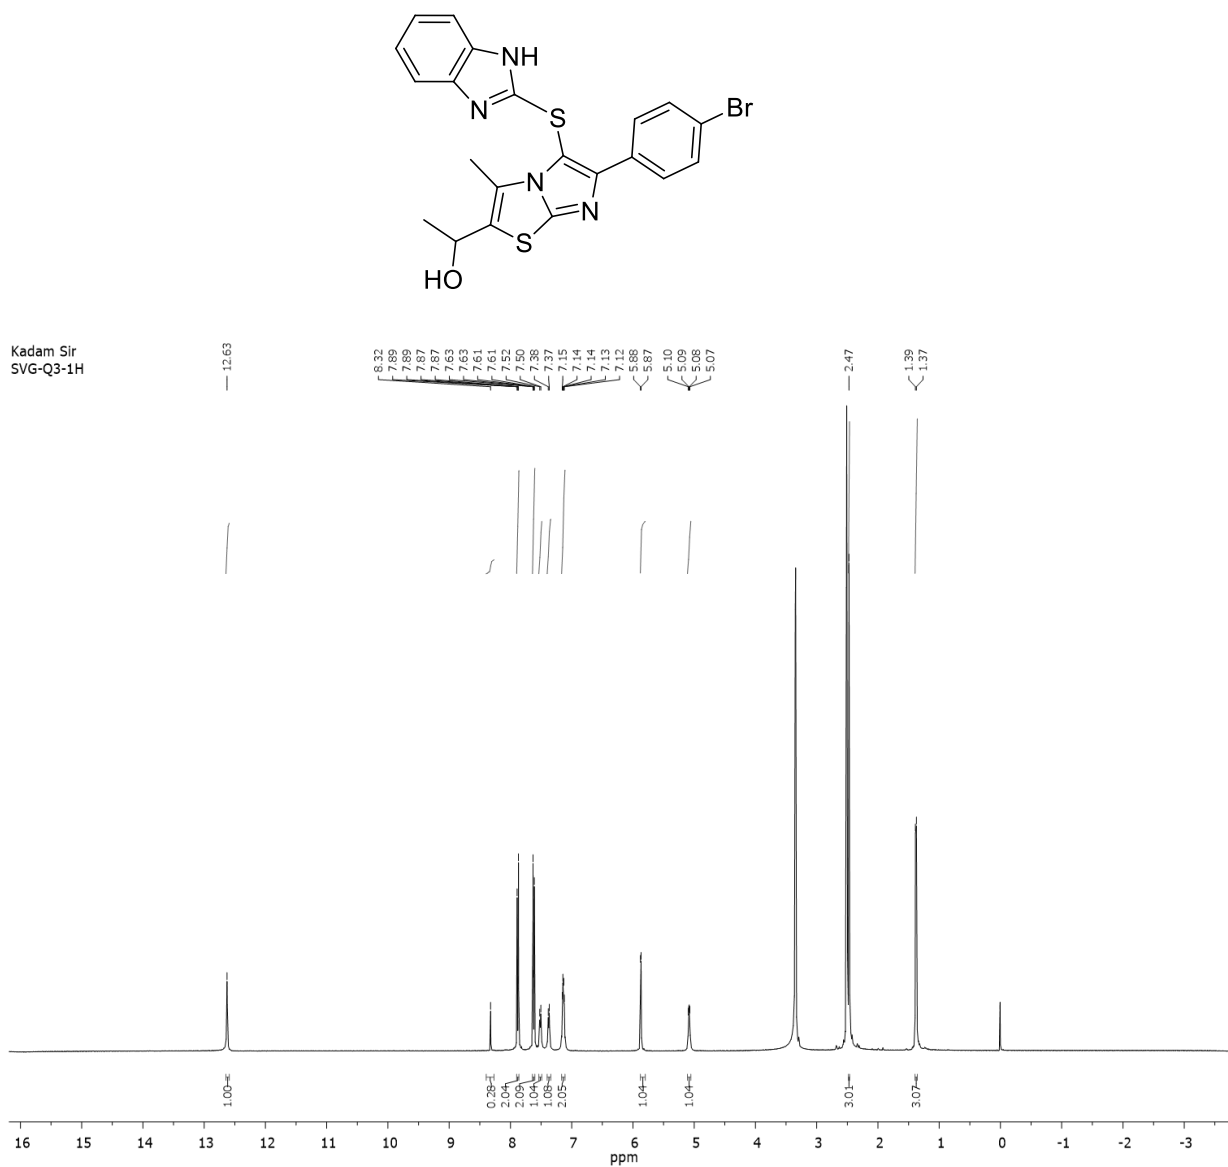

# <sup>13</sup>C NMR

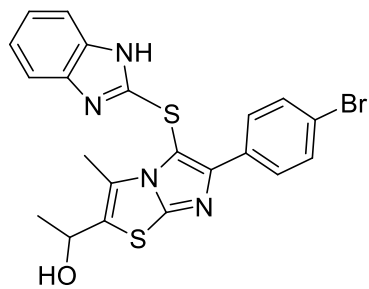

Kadam Sir  
SVG-Q3-13C

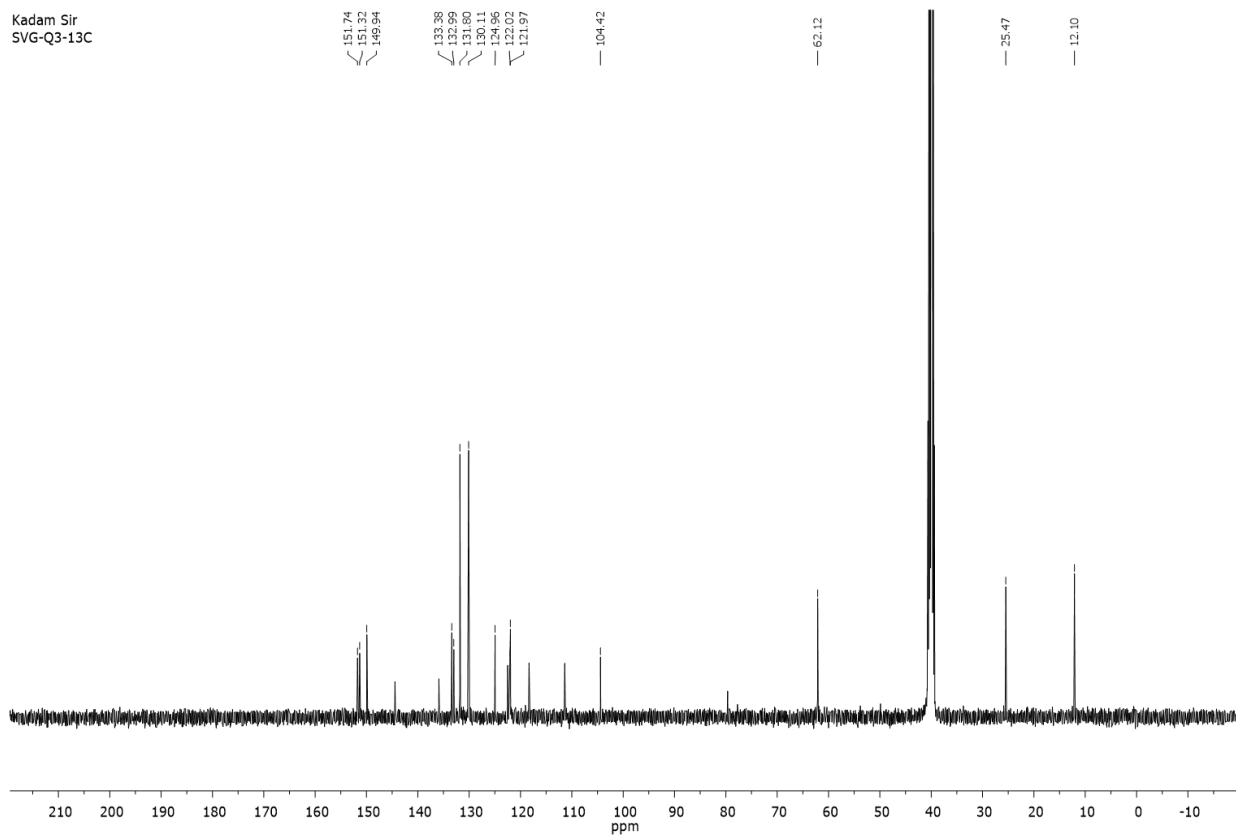

## HRMS

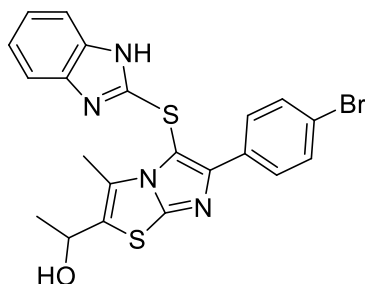

Calculated for  $C_{21}H_{17}BrN_4OS_2$ : 484.0027, found 485.0103.

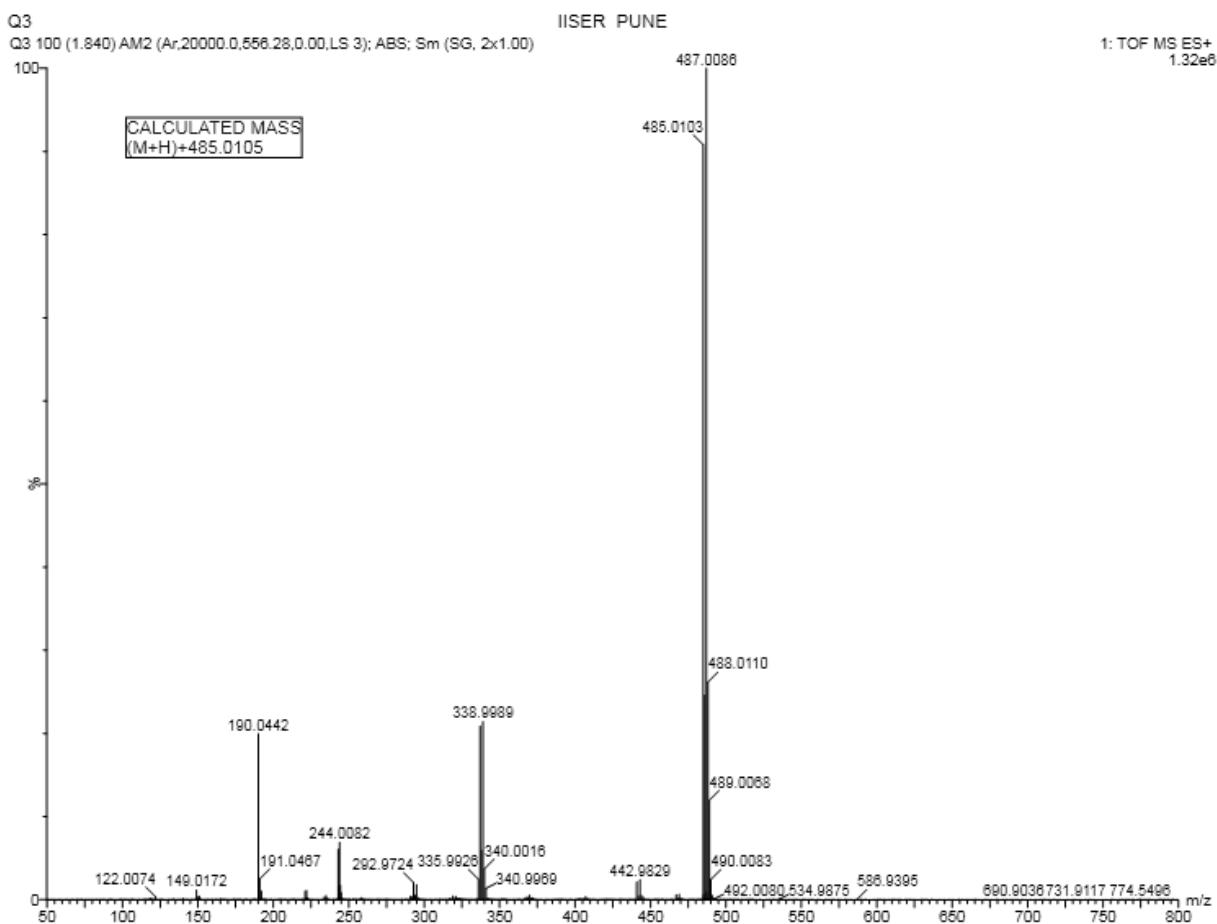

(e) Spectral data of 1-(5-((1H-benzo[d]imidazol-2-yl)thio)-3-methyl-6-(p-tolyl)imidazo[2,1-b]thiazol-2

*yl)ethanol (7d)*. White solid, mp 119-120 °C. <sup>1</sup>H-NMR (400 MHz, DMSO-*d*<sub>6</sub>) δ 11.40 (s, 1H), 6.44-6.42 (m, 1H), 6.34-6.33 (m, 2H), 6.24-6.16 (m, 1H), 5.97-5.96 (m, 2H), 5.67-5.65 (m, 2H), 4.33 (s, 1H), 3.78 (s, 1H), 1.44 (s, 3H), 0.19-0.18 (d, 3H). <sup>13</sup>C-NMR (400 MHz, DMSO-*d*<sub>6</sub>) δ 148.81, 147.38, 146.04, 139.99, 133.02, 130.95, 127.81, 124.85, 124.00, 122.87, 120.22, 117.09, 117.43, 105.90, 98.63, 57.84, 20.04, 16.42, 7.44. HRMS (ESI-TOF) *m/z*: [M+1] Calculated for C<sub>22</sub>H<sub>20</sub>N<sub>4</sub>OS<sub>2</sub>: 420.1079, found 421.1155.

### <sup>1</sup>H NMR

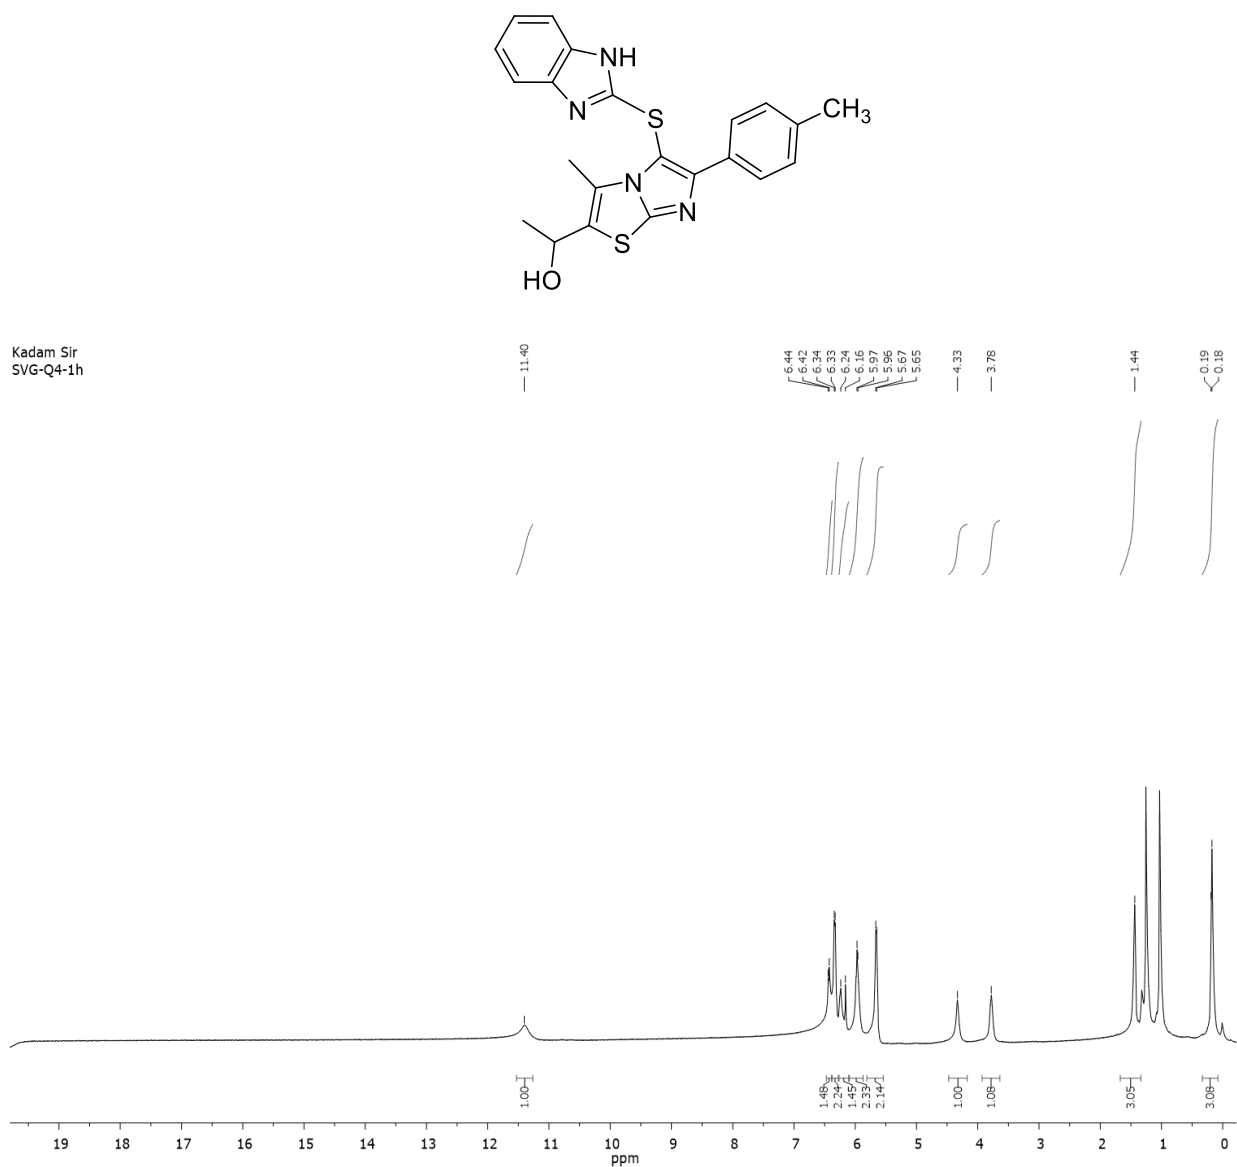



# <sup>13</sup>C NMR

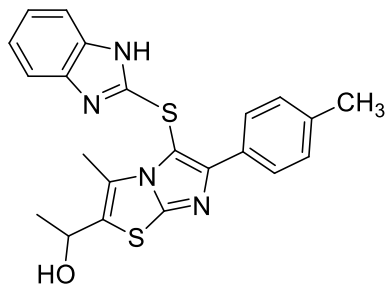

Kadam Sir  
SVG-Q4-13c

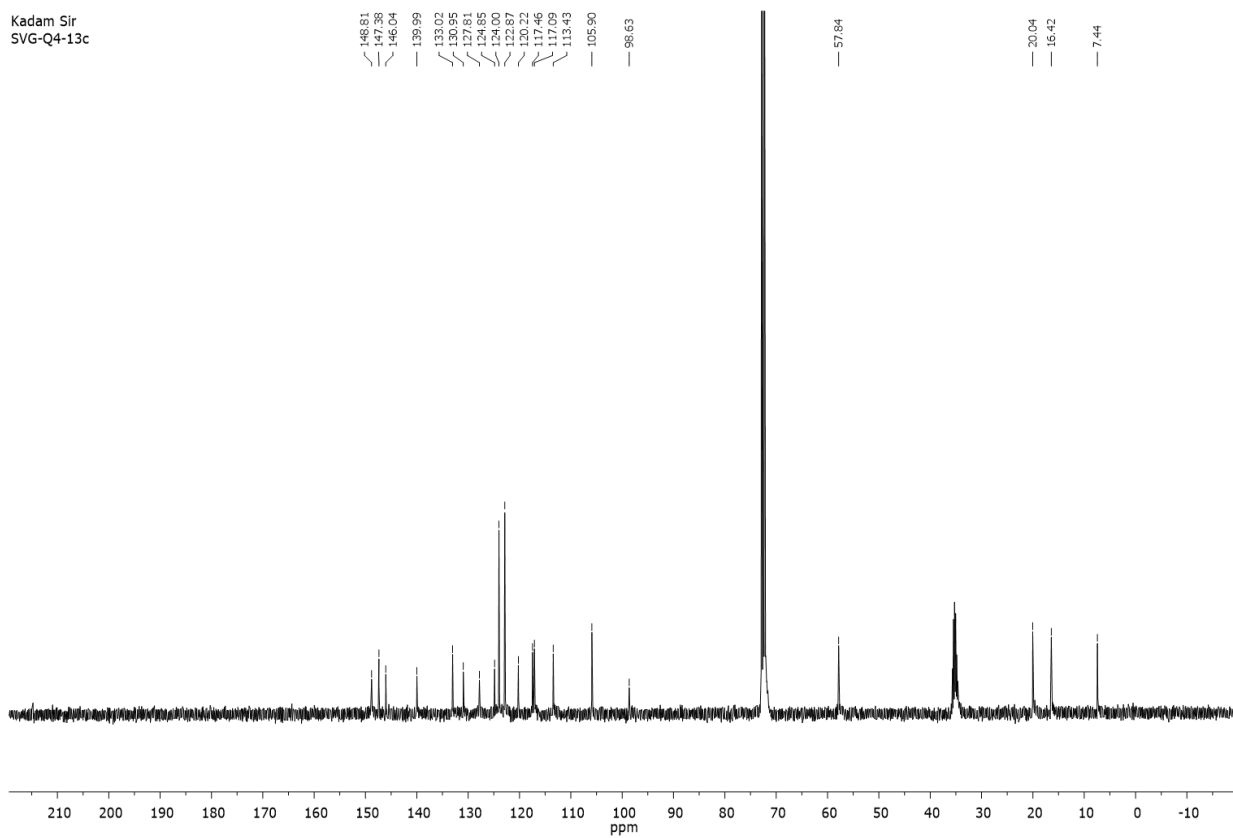

## HRMS

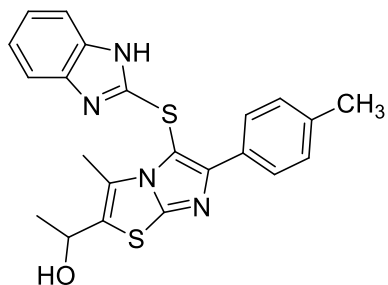

Calculated for  $C_{22}H_{20}N_4OS_2$ : 420.1079, found 421.1155.

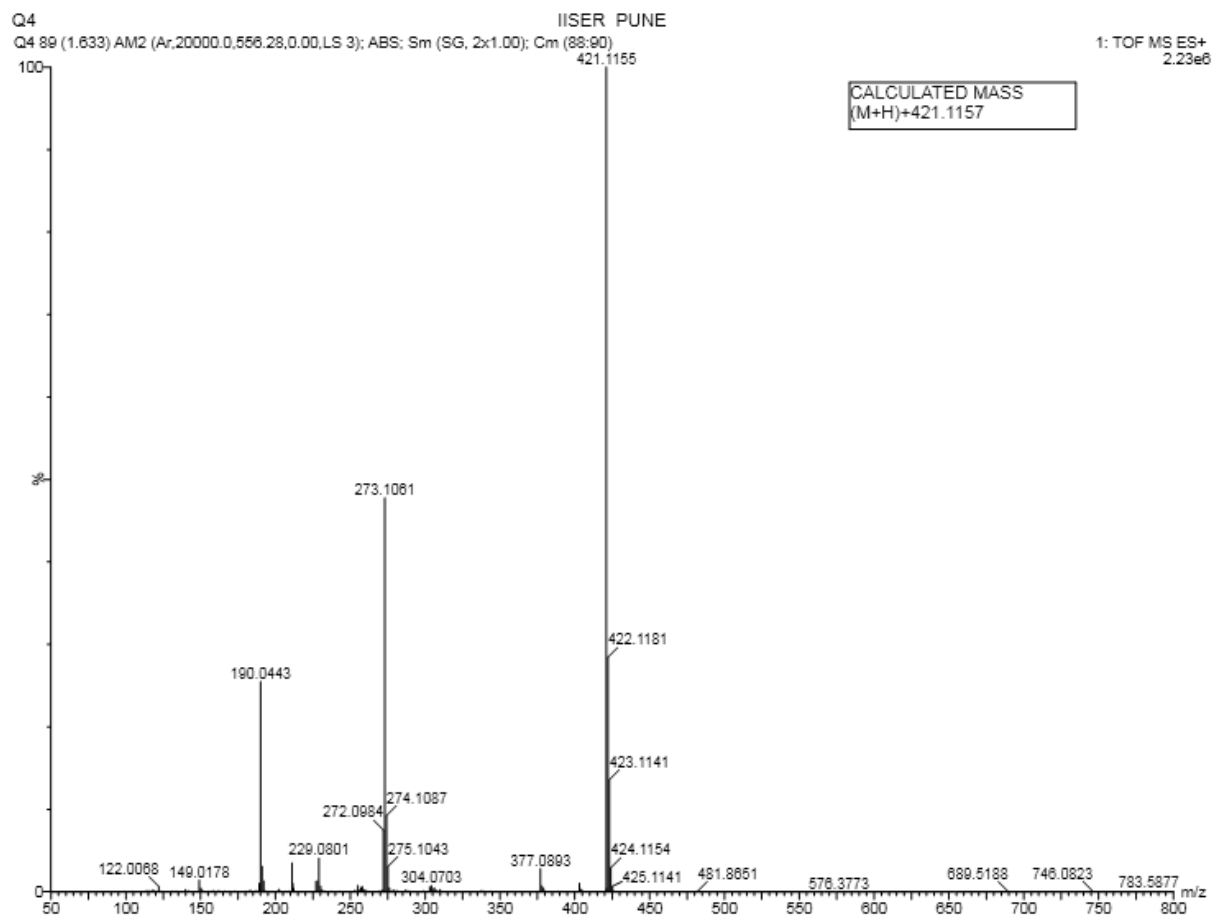

(f) Spectral data of *1-(5-((1H-benzo[d]imidazol-2-yl)thio)-6-(4-fluorophenyl)-3-methylimidazo[2,1 b]thiazol-2-yl)ethanol (7e)*. White solid, mp 112-113 °C. <sup>1</sup>H-NMR (400 MHz, DMSO-*d*<sub>6</sub>) δ 12.65 (s, 1H), 7.92 (m, 2H), 7.47-7.38 (m, 2H), 7.24 (m, 2H), 7.13 (m, 2H), 5.92 (m, 1H), 5.07 (s, 1H), 2.45 (s, 3H), 1.37 (s, 3H). <sup>13</sup>C-NMR (400 MHz, DMSO-*d*<sub>6</sub>) δ 163.64, 161.22, 151.71, 150.18, 150.18, 133.13, 130.22, 124.97, 122.50, 118.27, 115.84, 115.63, 111.40, 103.82, 62.10, 25.42, 12.05. HRMS (ESI-TOF) *m/z*: [M+1] Calculated for C<sub>21</sub>H<sub>17</sub>FN<sub>4</sub>OS<sub>2</sub>: 424.0828, found 425.0907.

### <sup>1</sup>H NMR

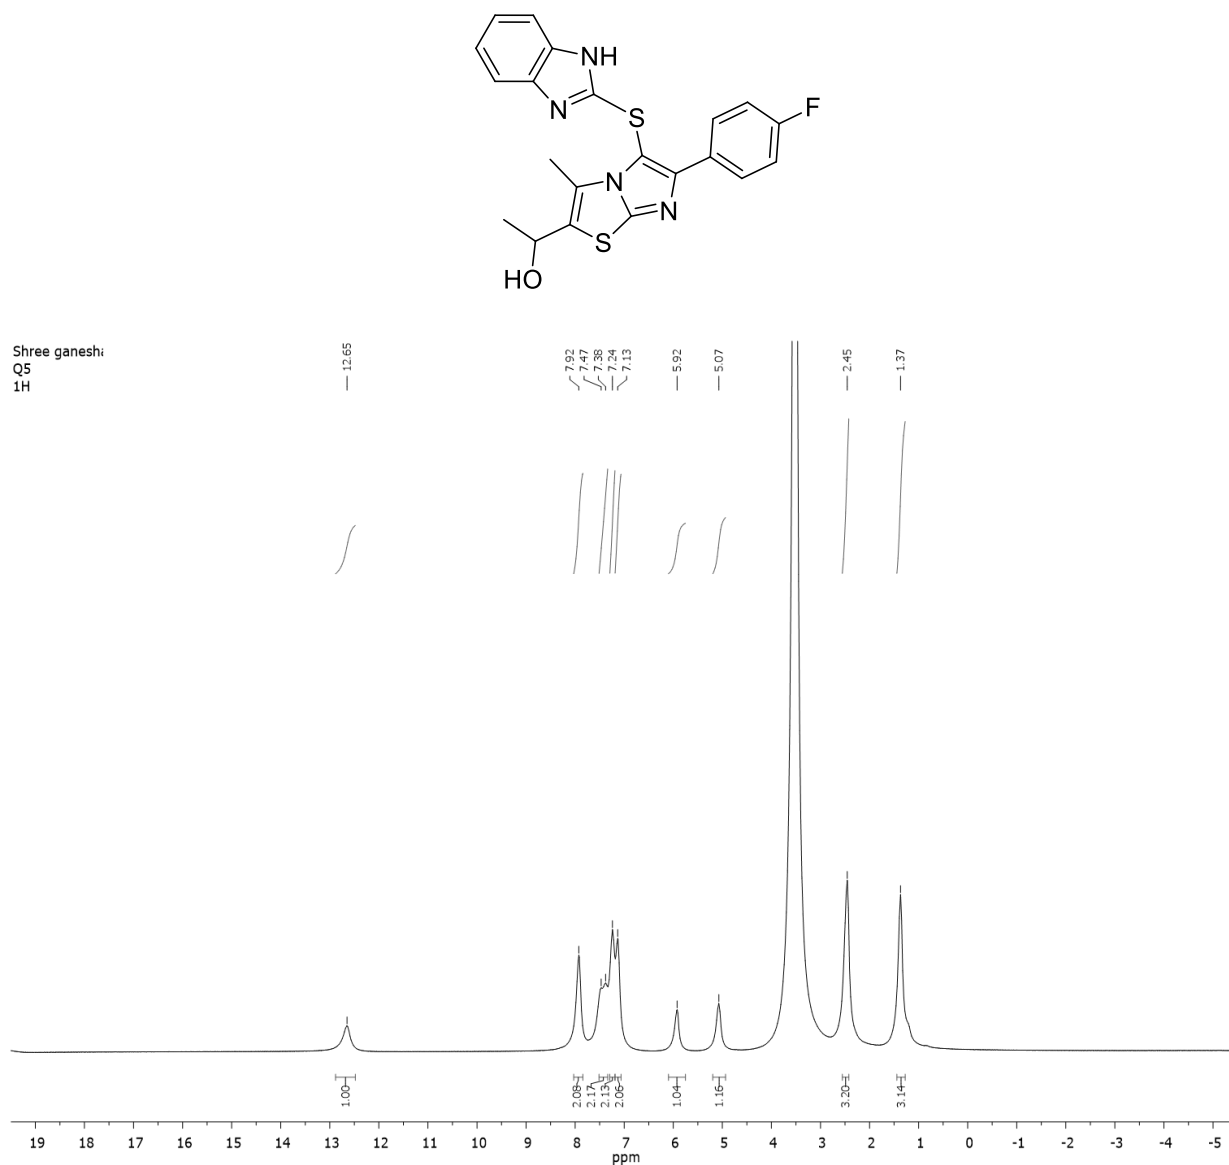

# <sup>13</sup>C NMR

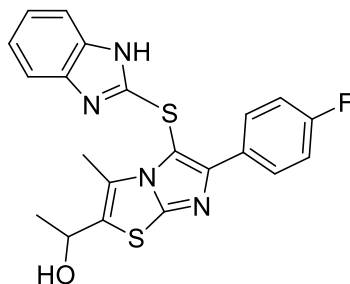

Dinest  
13C

163.64  
161.22  
151.71  
150.18  
150.18

133.13  
132.72  
129.97  
122.50  
118.27  
115.84  
115.63  
111.40

103.82

62.10

25.42

12.05

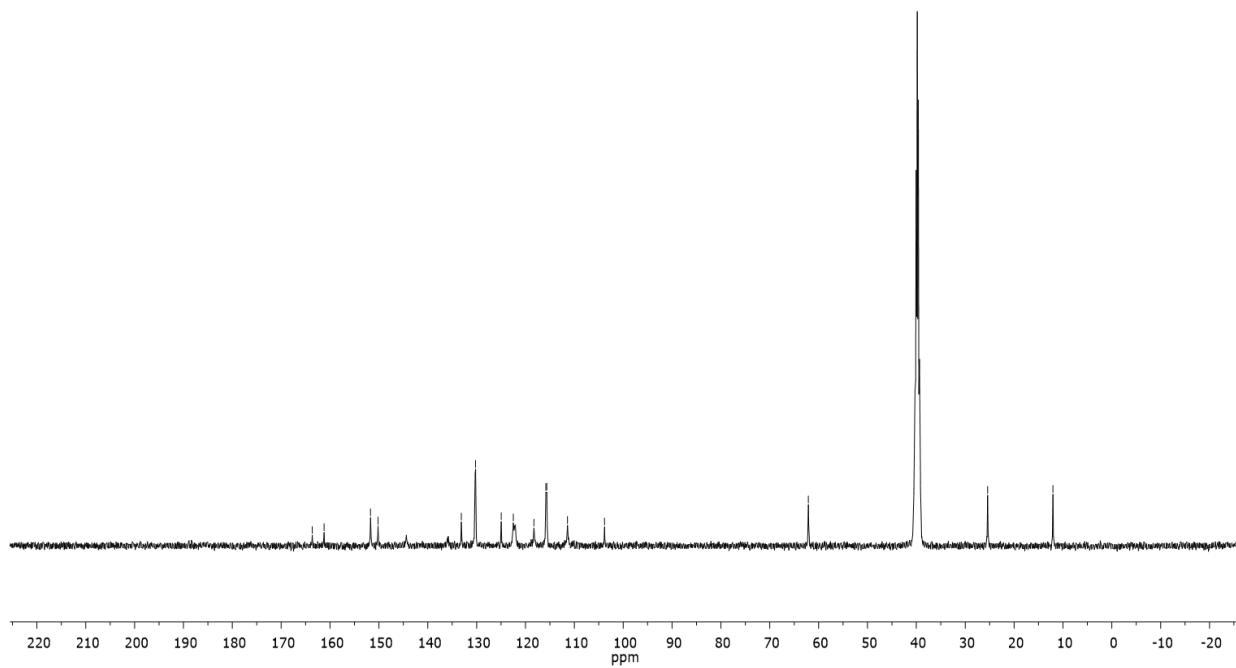

# HRMS

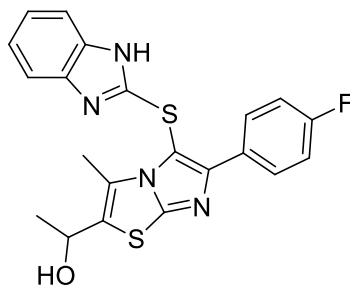

Calculated for  $C_{21}H_{17}FN_4OS_2$ : 424.0828, found 425.0907

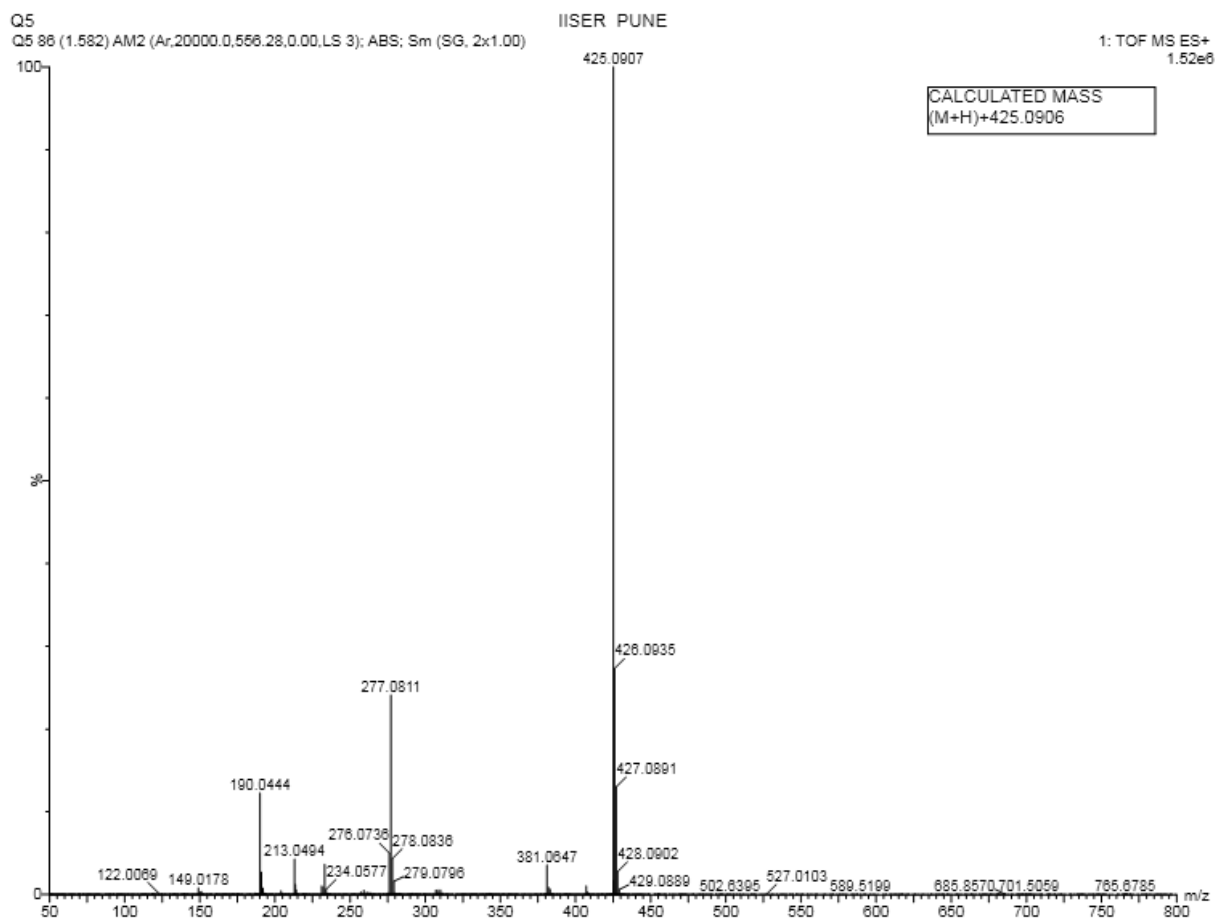

**6. a) General procedure for the synthesis of 1-(6-(4-chlorophenyl)-3-methyl-5-((5-(pyridin-4-yl)-1,3,4-oxadiazol-2-yl)thio)imidazo[2,1-b]thiazol-2-yl)ethanol (7f).**

NCS (1.5 mmol) was taken in round bottom flask containing CH<sub>3</sub>OH. To this same pot 5-(pyridin-4-yl)-1,3,4-oxadiazole-2-thiol (**2c**) (**Scheme 2**) (2 mmol) was added slowly with constant stirring, and reaction mass was stirred at room temperature up to 5 minutes. As TLC indicate the formation of (NHTS). Furthermore to the same pot 1-(6-(4-chlorophenyl)-3-methylimidazo[2,1-b]thiazol-2-yl)ethanol (2 mmol) was added with small proportions at a time and stirring was continued for another 20 minutes, as TLC indicate the completion of reaction. The reaction mass was poured on ice cold water, solid product separated out was filtered, dried and washed with aqueous ethanol. No further purification like column chromatography was needed.

**(b) Spectral data of 1-(6-(4-chlorophenyl)-3-methyl-5-((5-(pyridin-4-yl)-1,3,4-oxadiazol-2-yl)thio)imidazo[2,1-b]thiazol-2-yl)ethanol (7f).** White solid, mp 117-118 °C. FT-IR: 3318 (-OH) cm<sup>-1</sup>. <sup>1</sup>H-NMR (400 MHz, DMSO-*d*<sub>6</sub>) δ 8.82-8.80 (m, 2H), 7.99-7.97 (m, 2H), 7.82-7.81 (m, 2H), 7.54-7.52 (m, 2H), 5.94-5.93 (d, 1H) (Exchangeable with D<sub>2</sub>O), 5.15-5.13 (q, 1H), 2.63-2.54 (s, 3H), 2.51 (s, 3H), 1.41-1.39 (d, 3H). <sup>13</sup>C-NMR (400 MHz, DMSO-*d*<sub>6</sub>) δ 164.64, 164.02, 153.51, 153.07, 150.77, 134.69, 133.07, 131.12, 130.25, 129.58, 128.65, 125.03, 120.12, 99.75, 63.01, 24.69, 12.17. HRMS (ESI-TOF) m/z: [M+1] Calculated for C<sub>21</sub>H<sub>16</sub>ClN<sub>5</sub>O<sub>2</sub>S<sub>2</sub>: 469.0434, found 470.0507.



# <sup>1</sup>H NMR

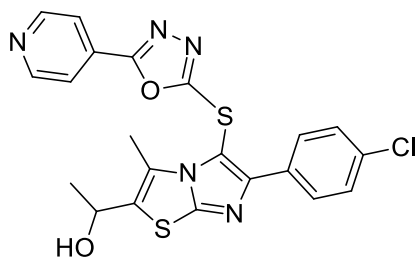

Nov03-2017  
Q11  
PROTON DMSO (E:\DY PATIL\ Sneha\5

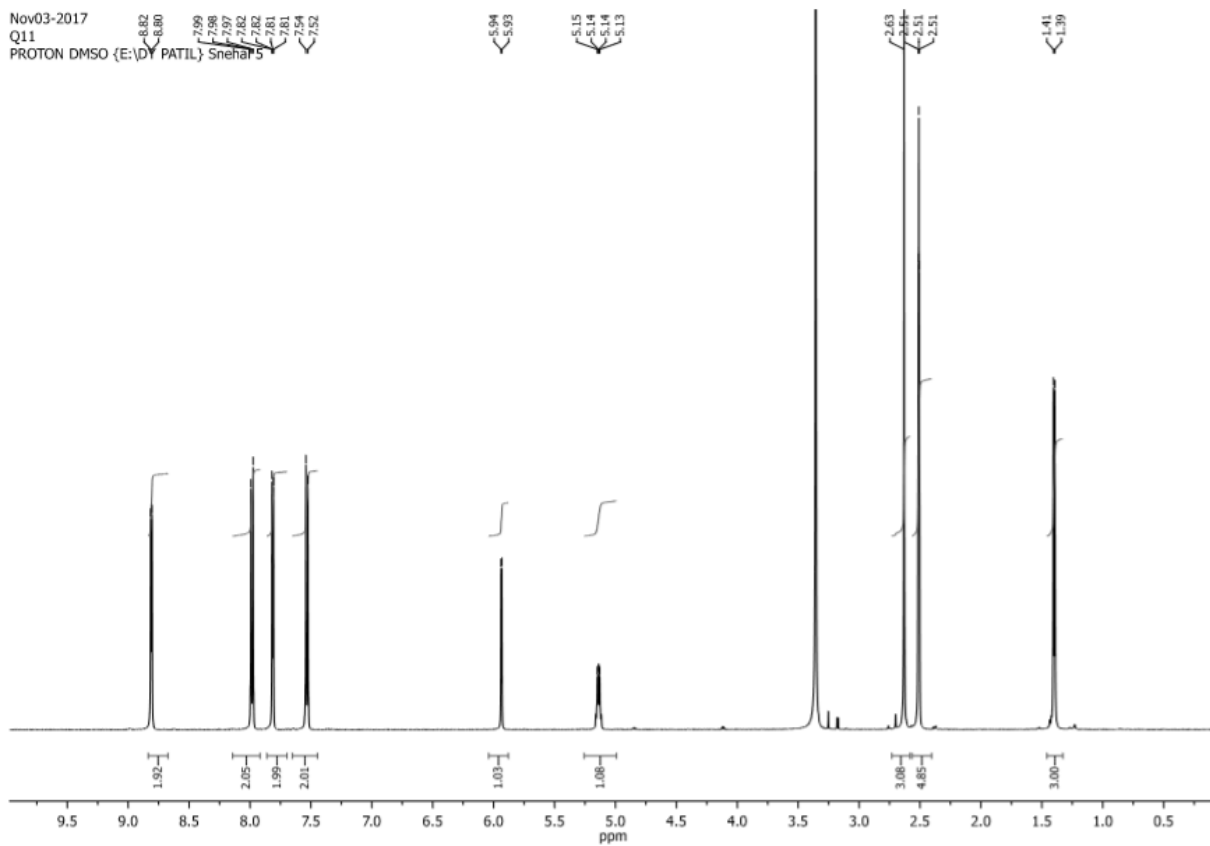



# <sup>1</sup>H NMR (D<sub>2</sub>O Exchange)

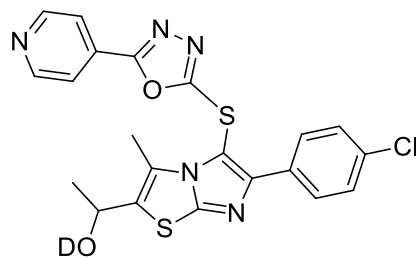

Nov06-2017  
Q11 D2O EXCH  
PROTON DMSO (E:\DY PATIL) Snehal 4

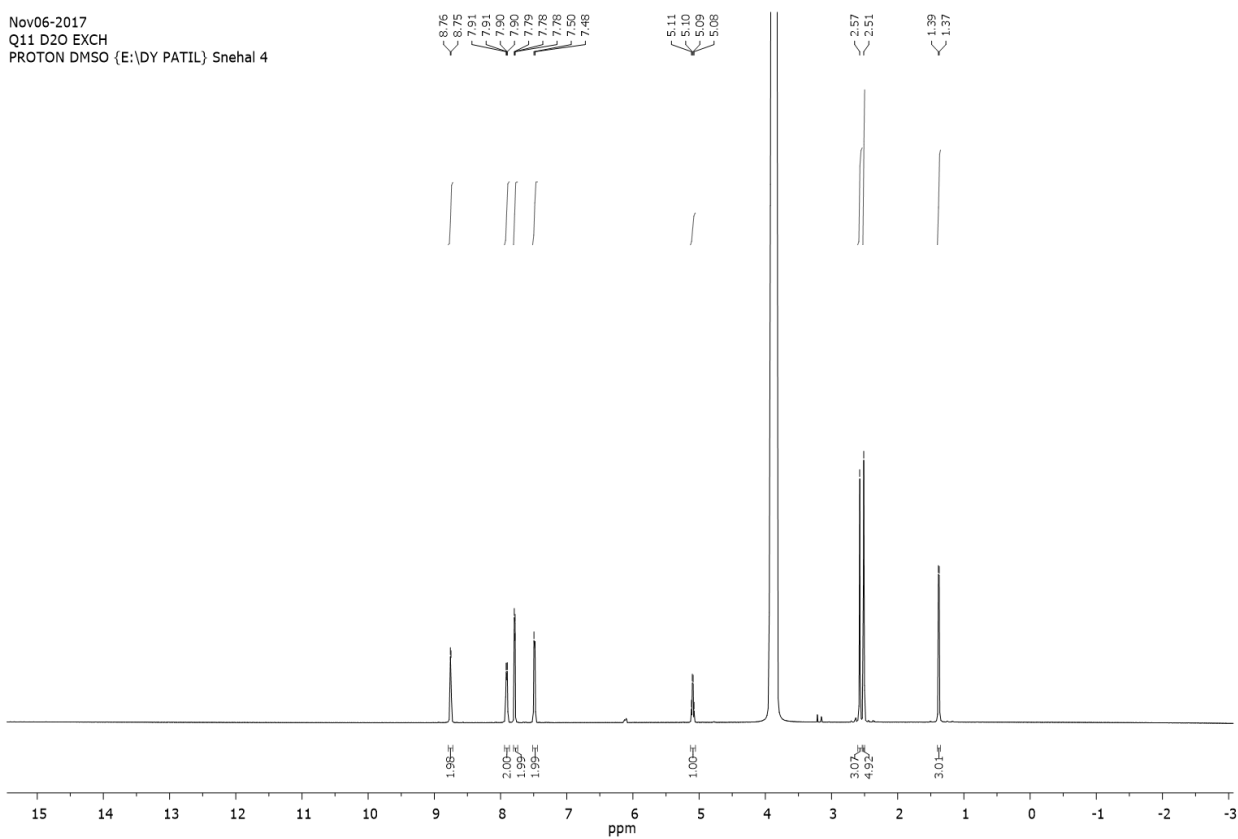

<sup>13</sup>C NMR

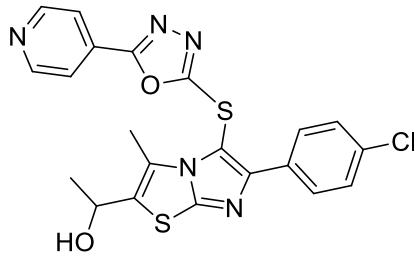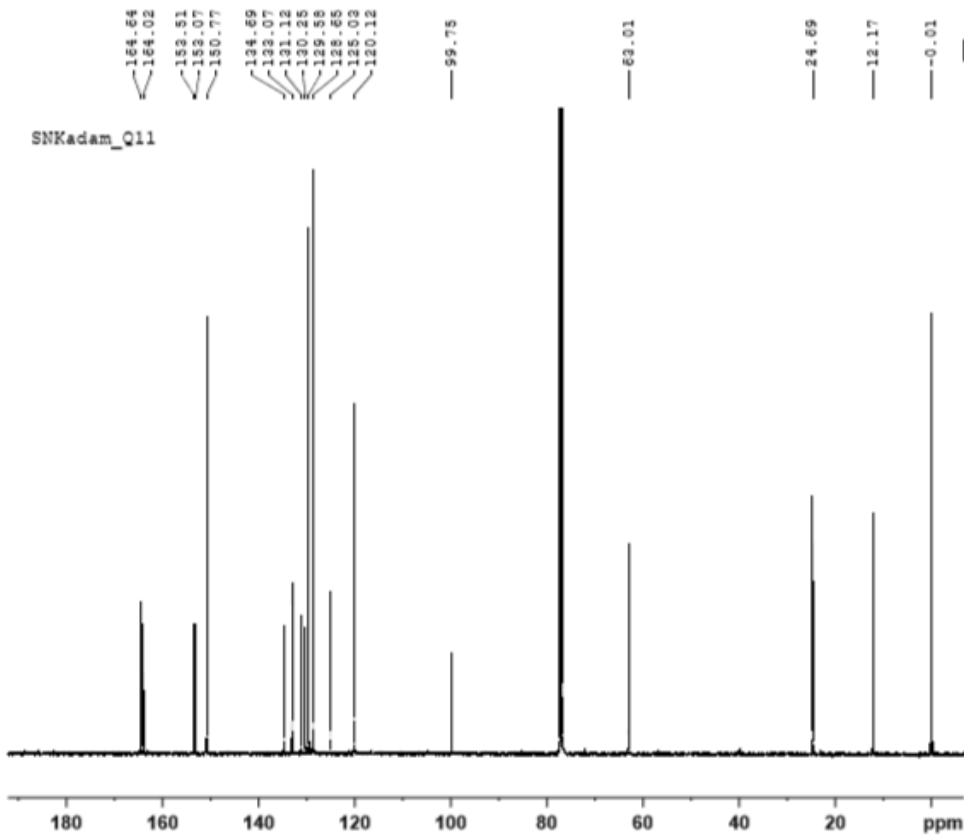

## HRMS

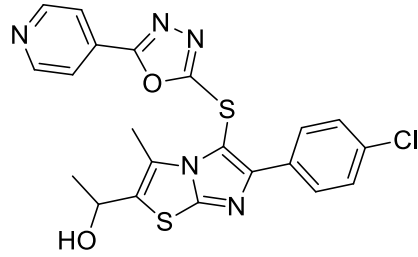

Calculated for  $C_{21}H_{16}ClN_5O_2S_2$ : 469.0434, found 470.0507.

Q11#290 RT: 1.29 AV: 1 NL: 3.65E8  
T: FTMS + p ESI Full ms [100.0000-1500.0000]

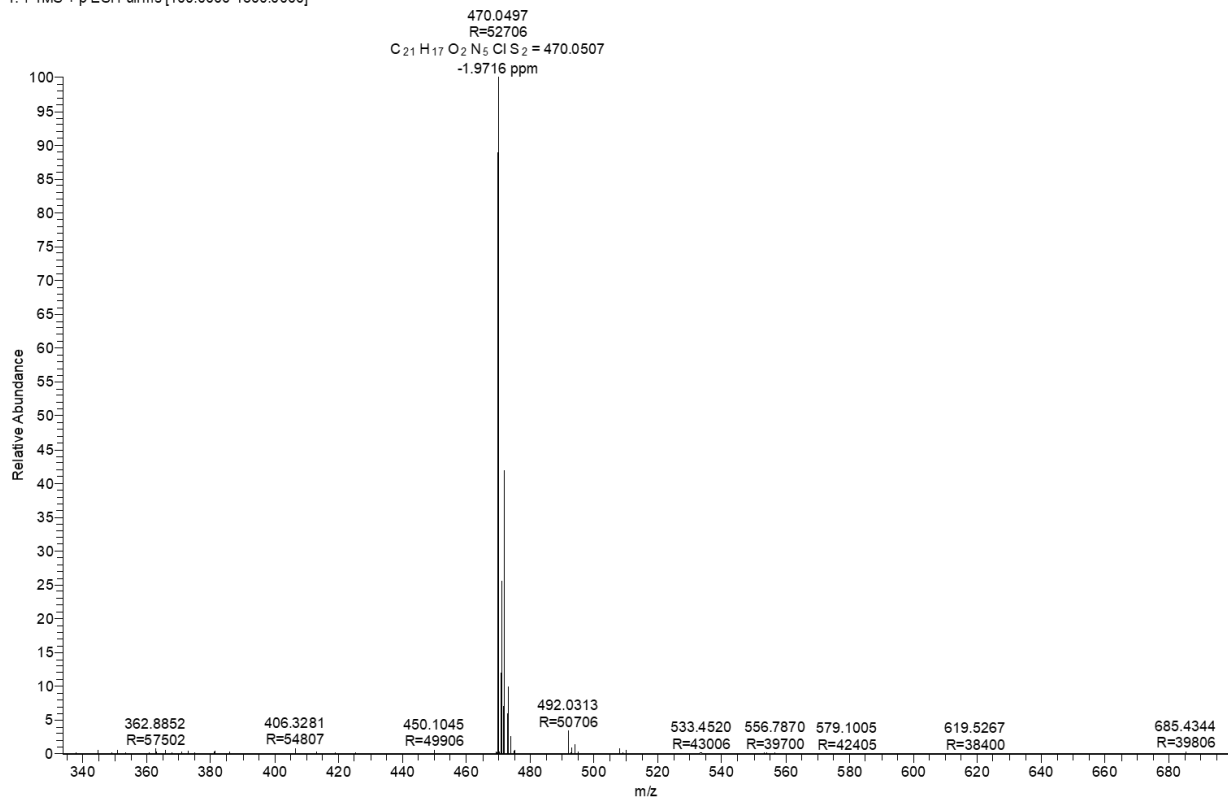

(c) Spectral data of *1-(3-methyl-6-phenyl-5-((5-(pyridin-4-yl)-1,3,4-oxadiazol-2-yl)thio)imidazo[2,1-b]thiazol-2-yl)ethanol (7g)*. White solid, mp 120-121 °C. <sup>1</sup>H-NMR (400 MHz, DMSO-*d*<sub>6</sub>) δ 8.79 (s, 2H), 7.93-7.92 (m, 2H), 7.79 (m, 2H), 7.45-7.44 (m, 2H), 5.97 (s, 1H), 5.13 (s, 1H), 2.61 (s, 3H), 1.40-1.39 (d, 3H). <sup>13</sup>C-NMR (400 MHz, DMSO-*d*<sub>6</sub>) δ 164.80, 164.25, 153.38, 151.99, 151.35, 133.59, 133.19, 130.54, 128.91, 128.47, 125.07, 120.49, 100.97, 62.15, 25.47, 12.24. HRMS (ESI-TOF) *m/z*: [M+1] Calculated for C<sub>21</sub>H<sub>17</sub>N<sub>5</sub>O<sub>2</sub>S<sub>2</sub>: 435.0824, found 436.0896.

### <sup>1</sup>H NMR

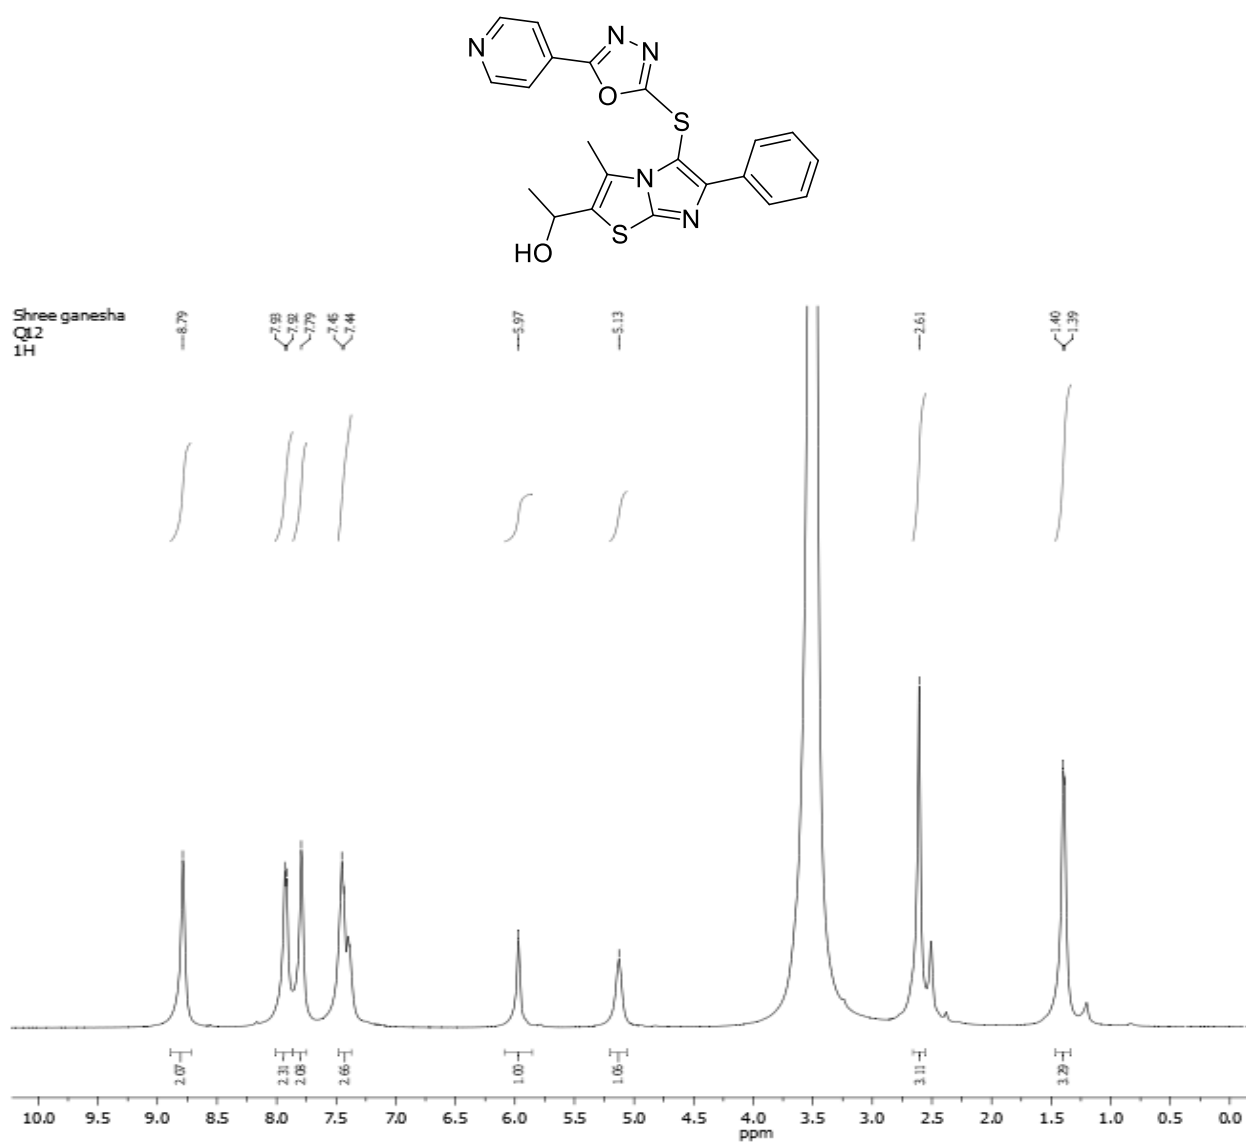

# <sup>13</sup>C NMR

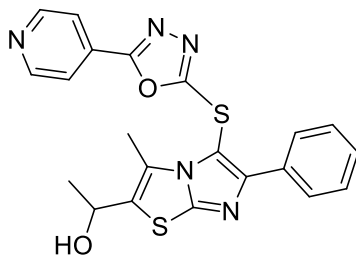

Shree ganesha  
13C

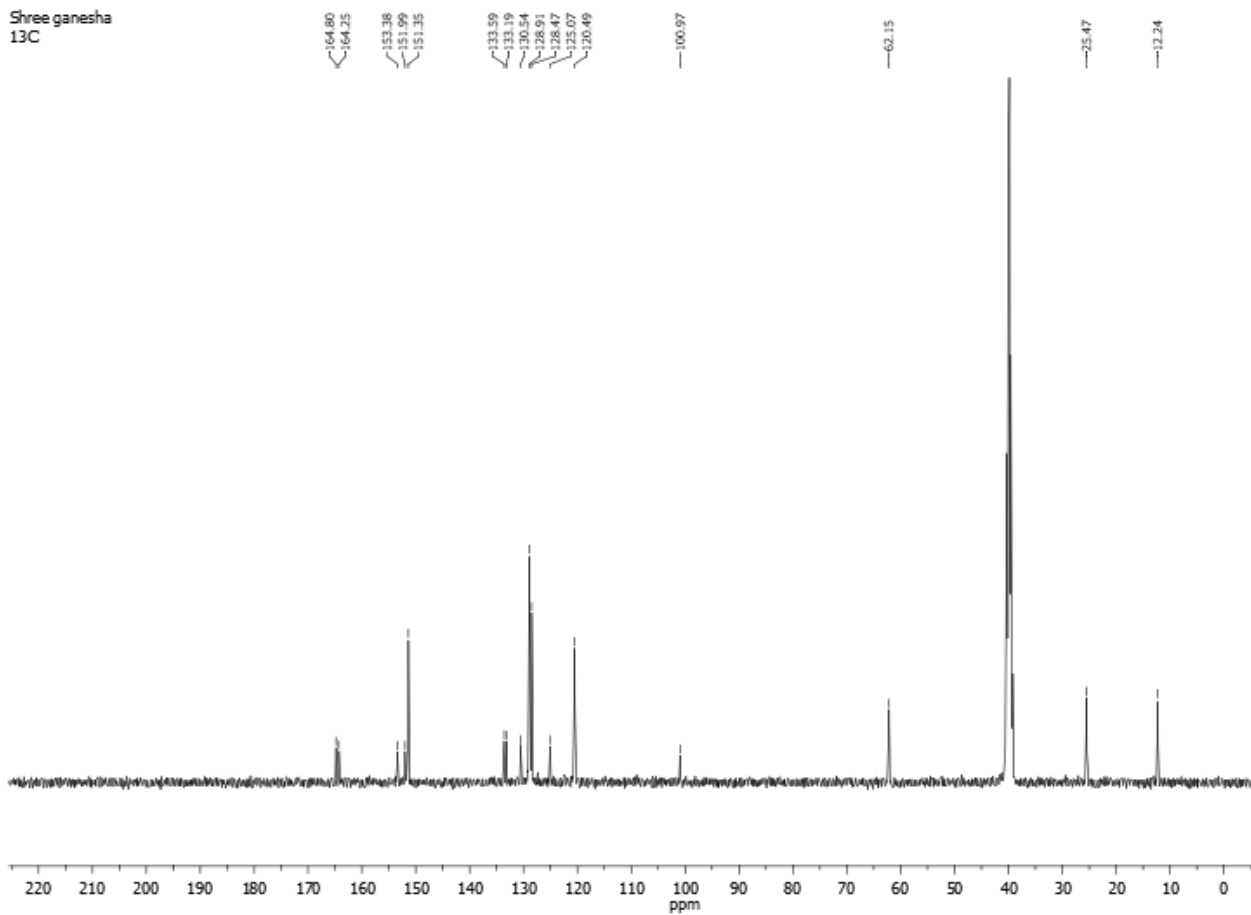

## HRMS

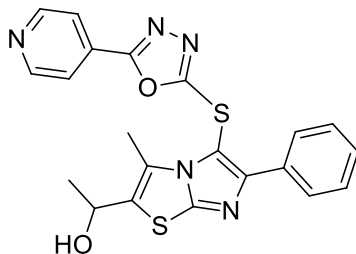

Calculated for  $C_{21}H_{17}N_5O_2S_2$ : 435.0824, found 436.0896.

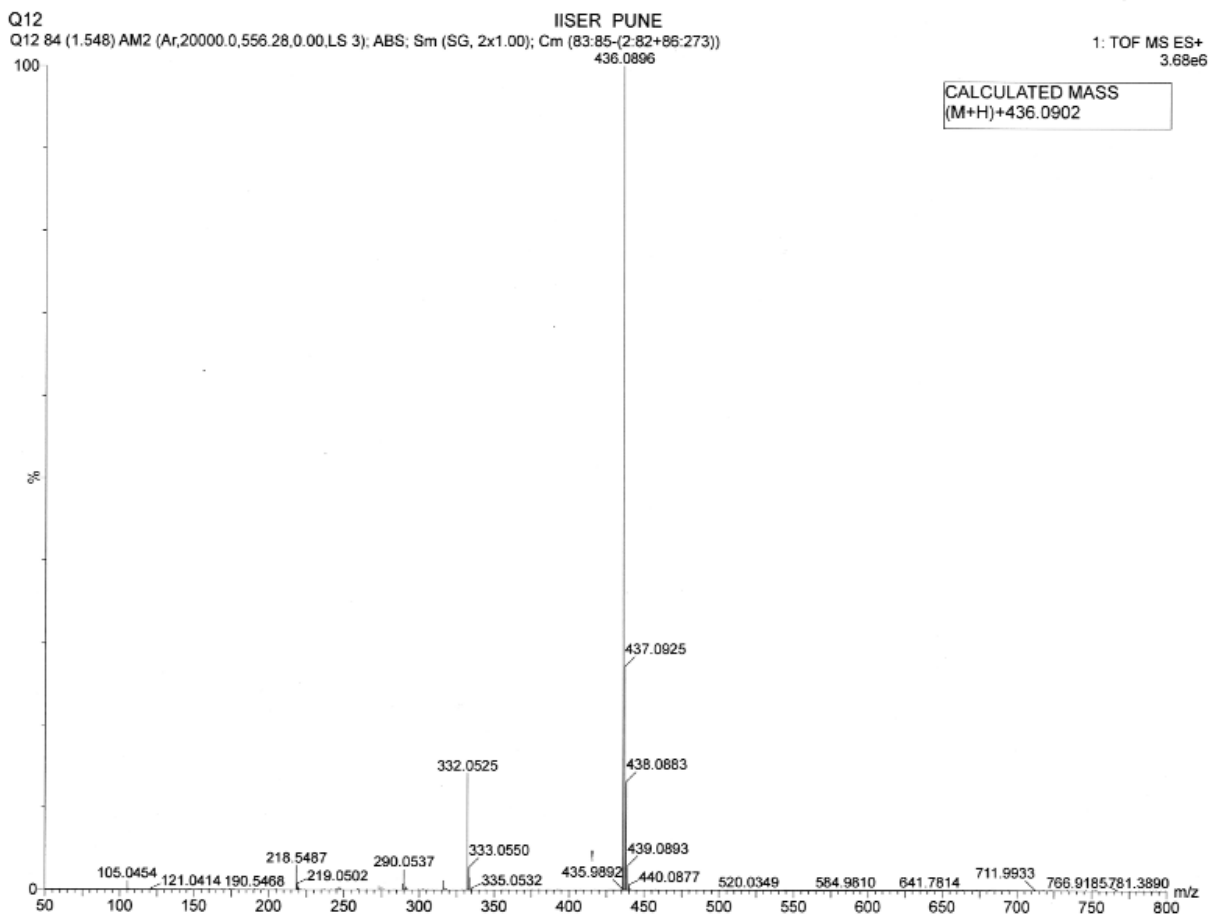

(d) Spectral data of *1-(6-(4-bromophenyl)-3-methyl-5-((5-(pyridin-4-yl)-1,3,4-oxadiazol-2-yl)thio)imidazo[2,1-b]thiazol-2-yl)ethanol (7h)*. White solid, mp 117-118 °C.  $^1\text{H-NMR}$  (400 MHz,  $\text{DMSO-}d_6$ )  $\delta$  8.77-8.76 (d, 2H), 7.89-7.87 (d, 2H), 7.77-7.67 (d, 2H),

7.63-7.62 (d, 2H), 5.98-5.97 (d, 1H), 5.13-5.11 (m, 1H), 2.60 (s, 3H), 1.39-1.38 (d, 3H).  
 $^{13}\text{C}$ -NMR (400 MHz,  $\text{DMSO-}d_6$ )  $\delta$  148.65, 141.73, 133.28, 132.55, 132.42, 128.91, 123.79, 90.77, 62.17, 25.39, 13.03. HRMS (ESI-TOF)  $m/z$ :  $[\text{M}+1]$  Calculated for  $\text{C}_{21}\text{H}_{16}\text{BrN}_5\text{O}_2\text{S}_2$ : 512.9929, found 515.9980.

### $^1\text{H}$ NMR

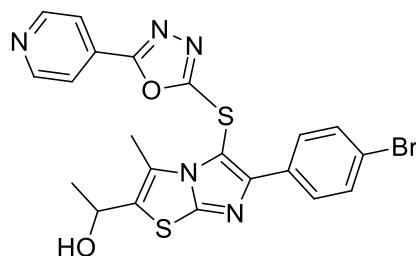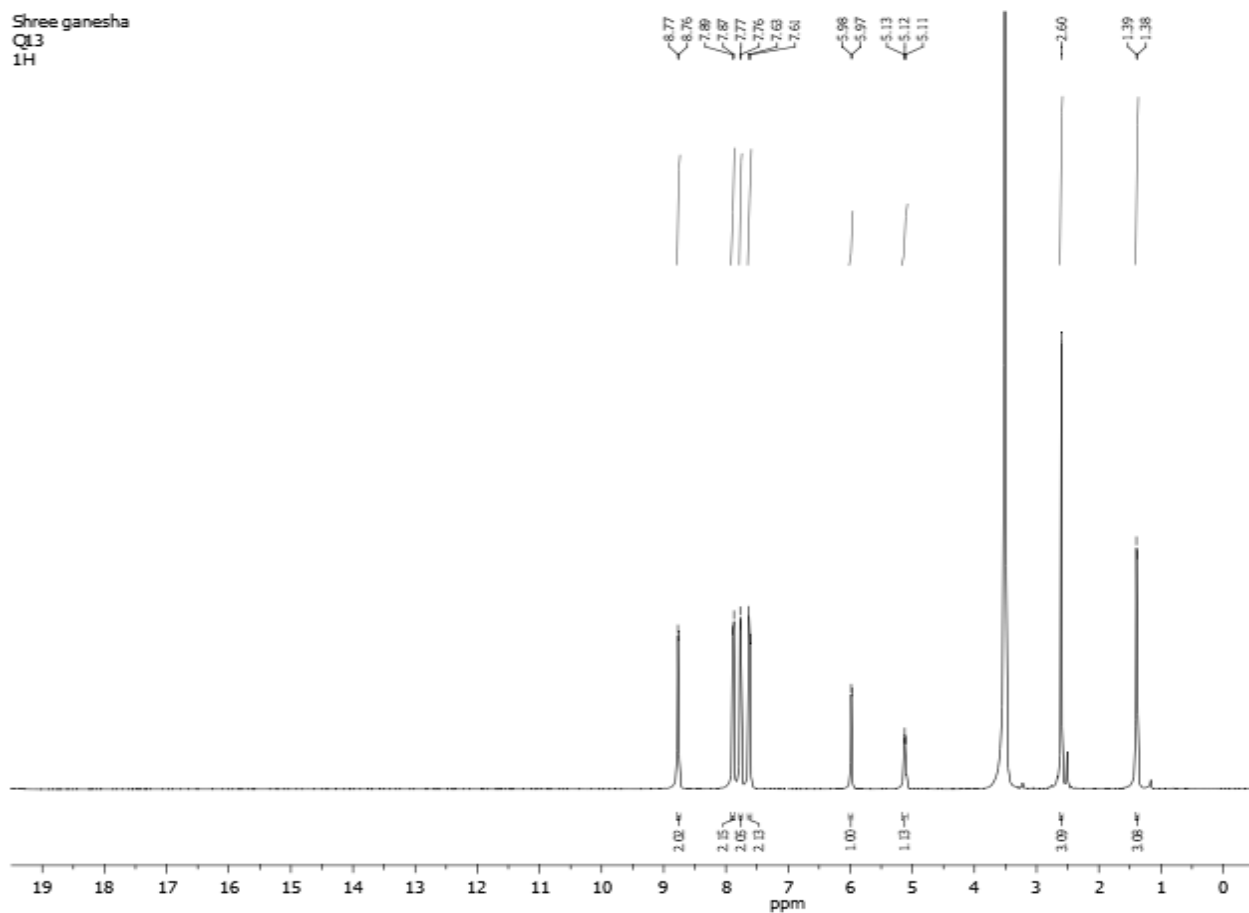

# <sup>13</sup>C NMR

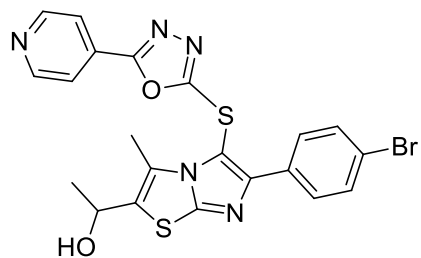

Shree ganesh  
13C  
Q91

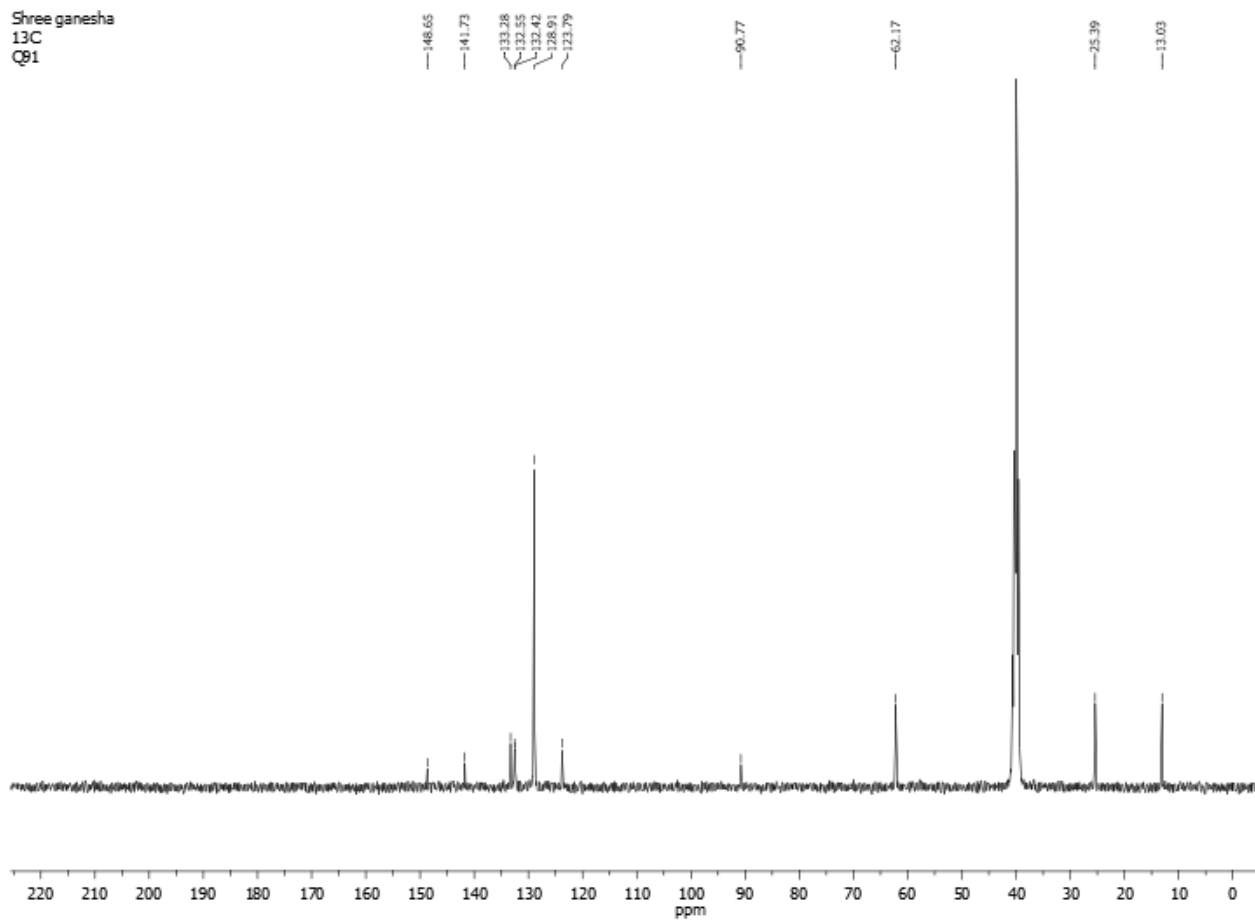



## HRMS

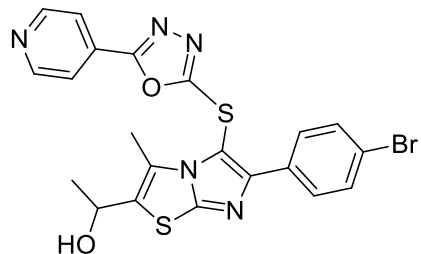

Calculated for  $C_{21}H_{16}BrN_5O_2S_2$ : 512.9929, found 515.9980.

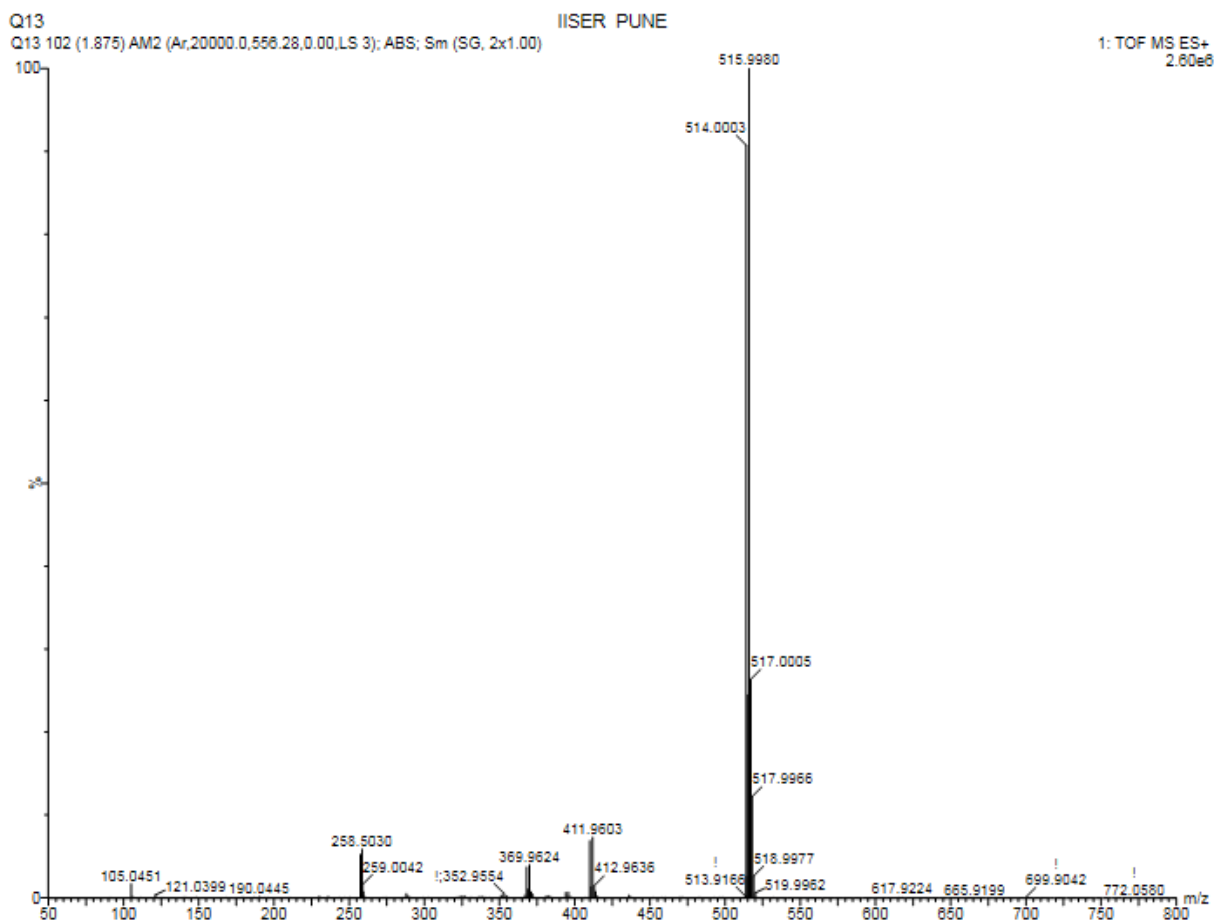

(e) Spectral data of *1-(3-methyl-5-((5-(pyridin-4-yl)-1,3,4-oxadiazol-2-yl)thio)-6-(p-tolyl)imidazo[2,1-b]thiazol-2-yl)ethanol (7i)*. White solid, mp 115-116 °C.  $^1\text{H-NMR}$  (400 MHz,  $\text{DMSO-}d_6$ )  $\delta$  8.82-8.81 (d, 2H), 7.84-7.81 (m, 4H), 7.28-7.27 (d, 2H), 5.92-5.91(d,

1H), (Exchangeable with D<sub>2</sub>O), 5.15-5.13 (q, 1H), 2.62 (s, 3H), 2.34 (s, 3H), 1.41-1.39 (d, 3H). <sup>13</sup>C-NMR (400 MHz, DMSO-*d*<sub>6</sub>) δ 164.55, 164.36, 155.06, 152.93, 150.79, 138.72, 132.28, 130.32, 129.79, 129.17, 128.25, 125.26, 120.11, 99.20, 63.15, 24.65, 21.35, 12.20. HRMS (ESI-TOF) m/z: [M+1] Calculated for C<sub>22</sub>H<sub>19</sub>N<sub>5</sub>O<sub>2</sub>S<sub>2</sub>: 449.0980, found 450.1044.

## <sup>1</sup>H NMR

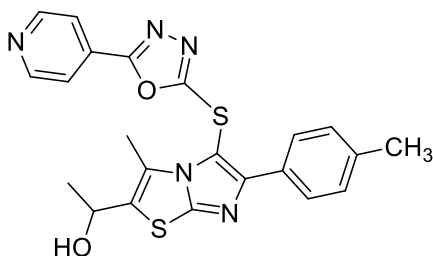

Nov03-2017  
Q14  
PROTON DMSO-{E\DY PATIL} Snehal 6

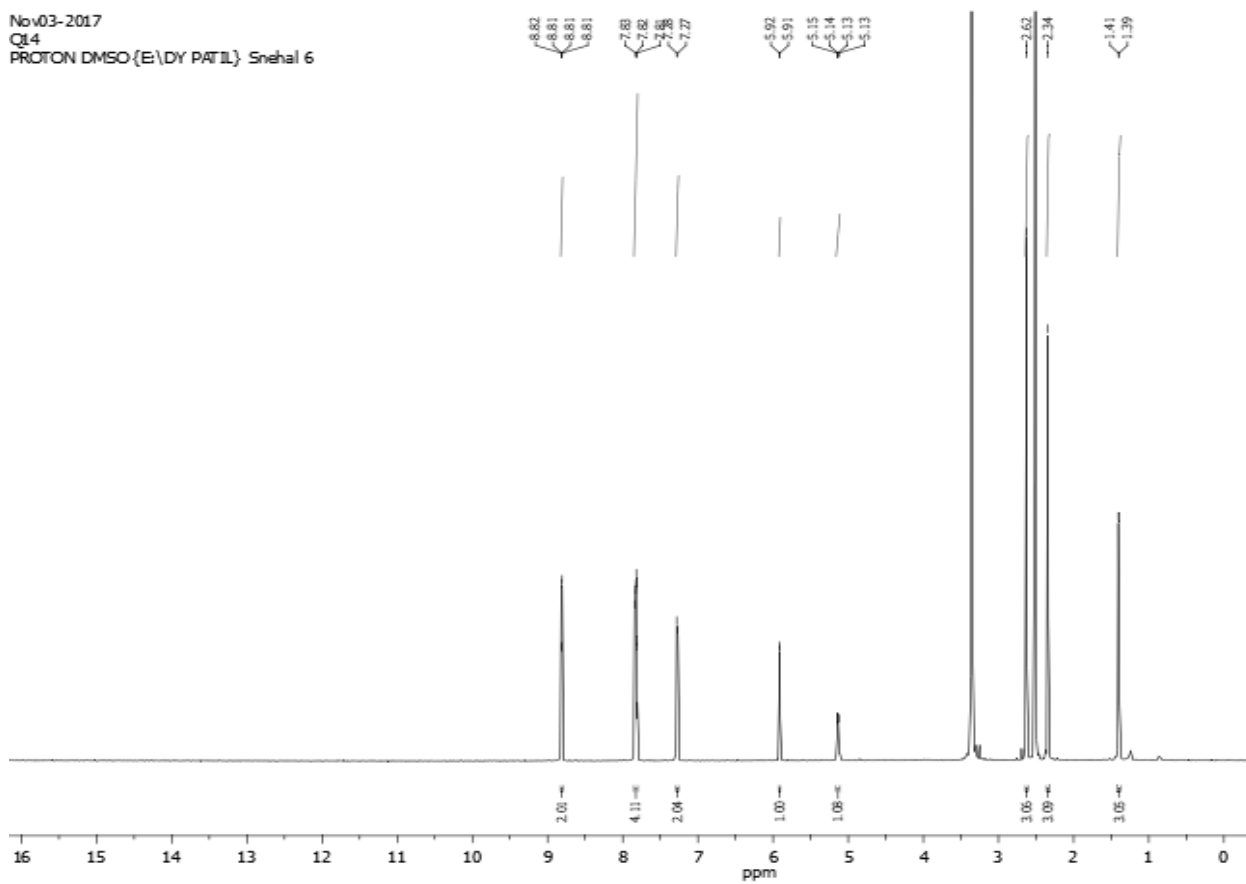



<sup>13</sup>C NMR

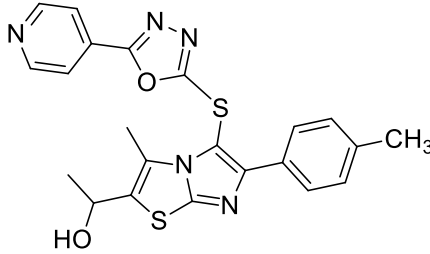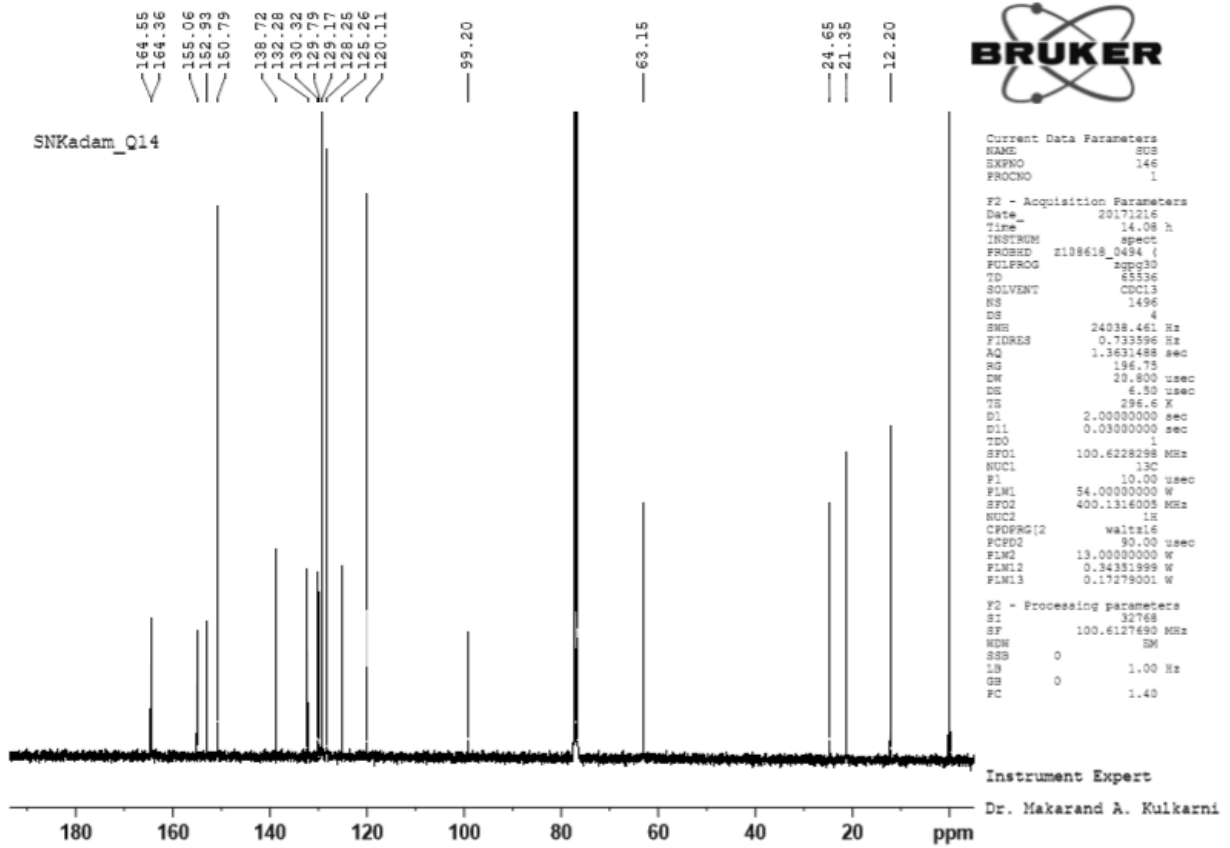

## HRMS

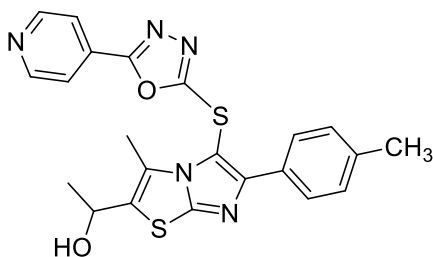

Calculated for C<sub>22</sub>H<sub>19</sub>N<sub>5</sub>O<sub>2</sub>S<sub>2</sub>: 449.0980, found 450.1044.

Q14#285 RT: 1.27 AV: 1 NL: 2.48E8  
T: FTMS + p ESI Full ms [100.0000-1500.0000]

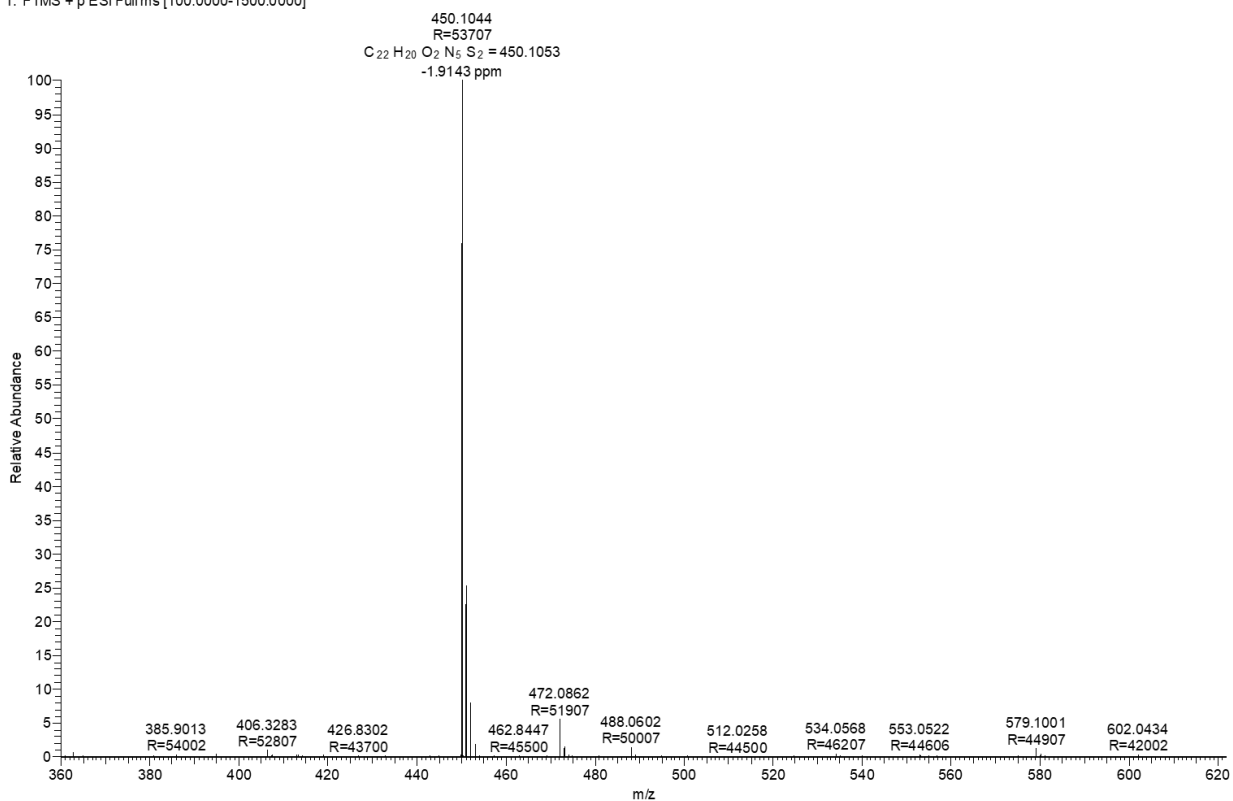

(f) Spectral data of 1-(6-(4-fluorophenyl)-3-methyl-5-((5-(pyridin-4-yl)-1,3,4-oxadiazol-2-yl)thio)imidazo[2,1-b]thiazol-2-yl)ethanol (7j). White solid, mp 111-112 °C. <sup>1</sup>H-NMR (400 MHz, DMSO-*d*<sub>6</sub>) δ 8.79 (s, 2H), 7.97 (d, 2H), 7.80 (d, 2H), 7.29 (d, 1H), 5.97 (s, 1H),

5.12 (s, 1H), 2.61-2.51 (d, 3H), 1.39 (d, 3H).  $^{13}\text{C-NMR}$  (400 MHz,  $\text{DMSO-}d_6$ )  $\delta$  164.83, 164.12, 152.42, 151.97, 151.36, 133.66, 130.62, 130.55, 129.70, 125.06, 120.50, 115.97, 115.76, 100.96, 62.14, 25.46, 12.23. HRMS (ESI-TOF)  $m/z$ :  $[\text{M}+1]$  Calculated for  $\text{C}_{21}\text{H}_{16}\text{FN}_5\text{O}_2\text{S}_2$ : 453.0729, found 454.0800.

## $^1\text{H}$ NMR

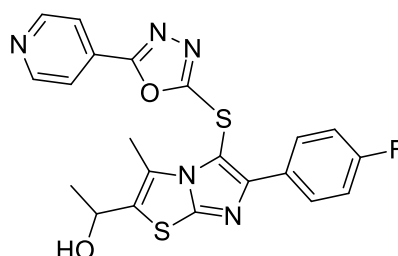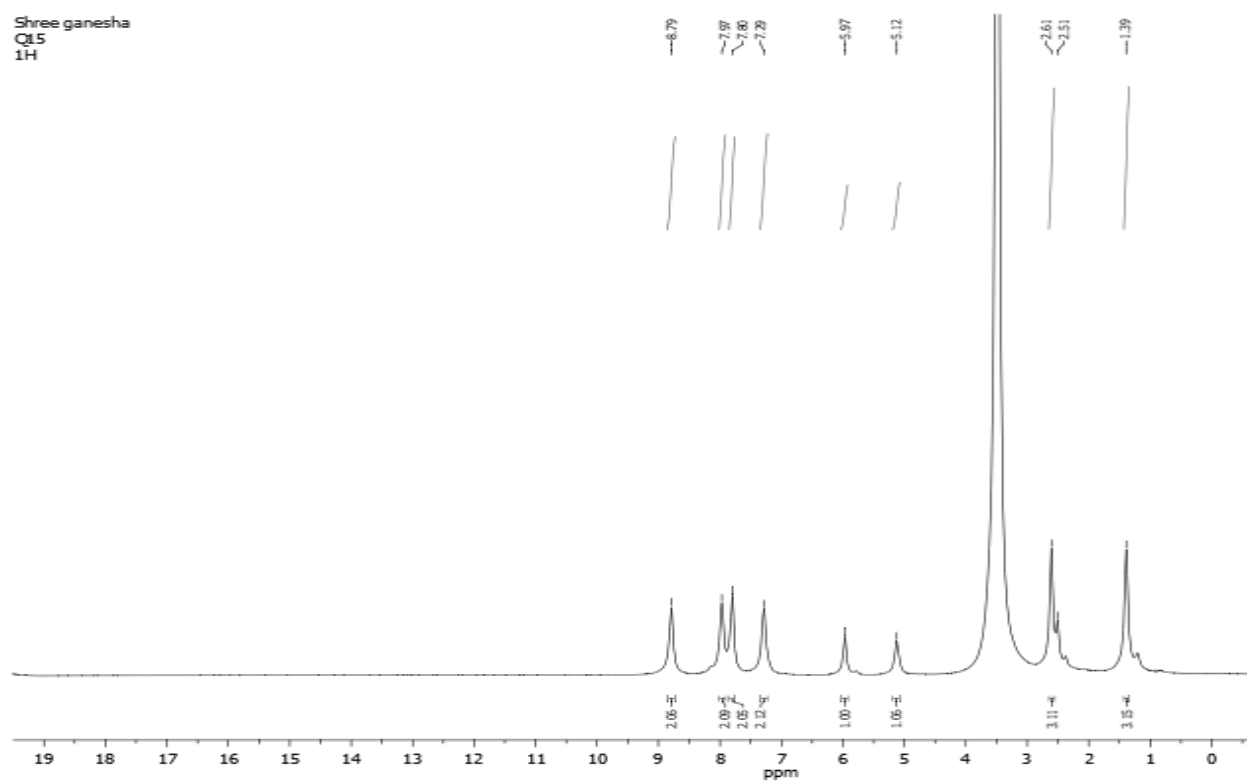

# <sup>13</sup>C NMR

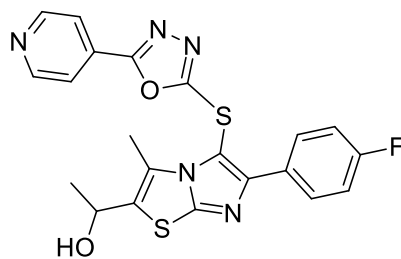

Shree ganesh  
13C

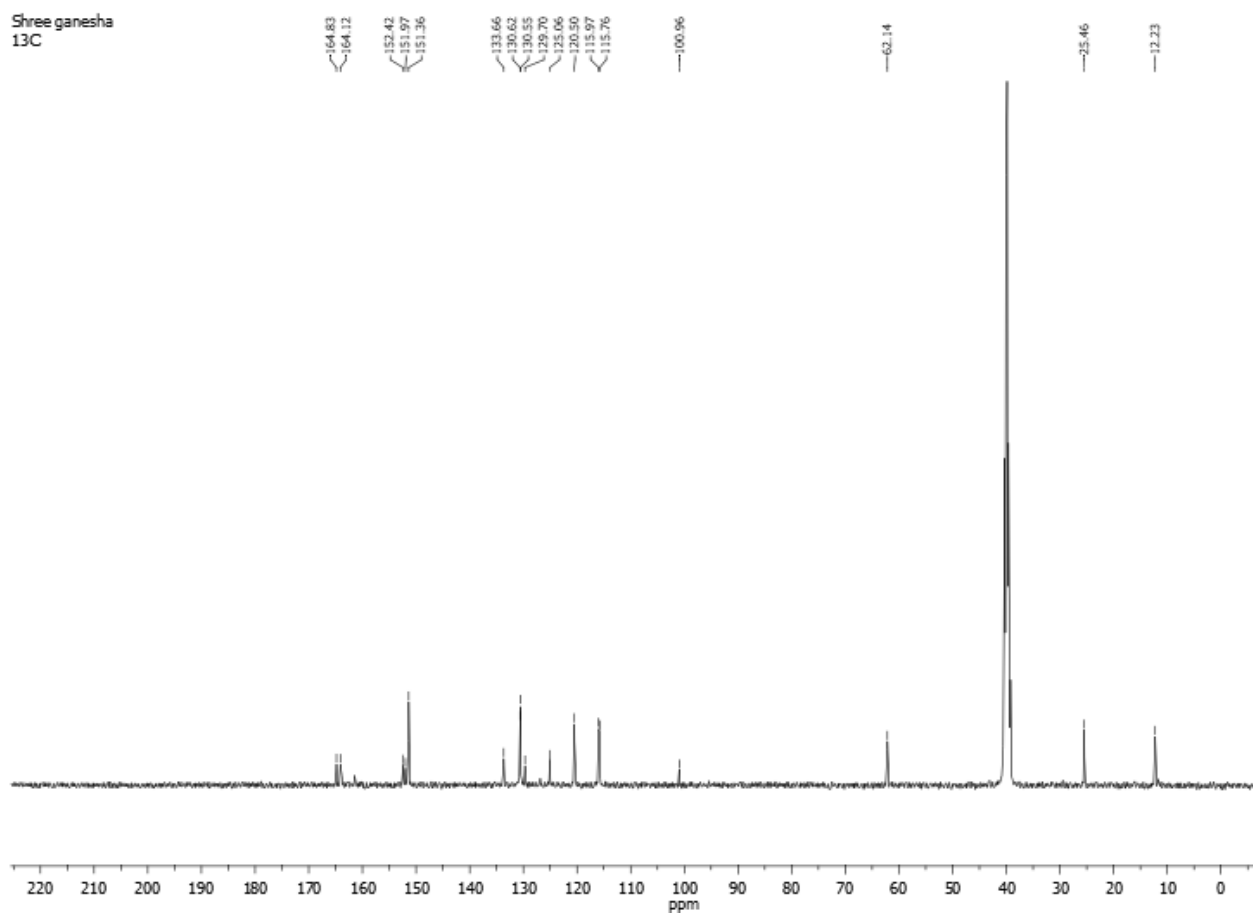

# HRMS

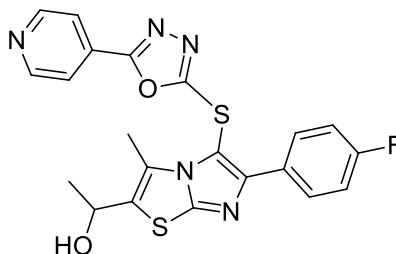

Calculated for  $C_{21}H_{16}FN_5O_2S_2$ : 453.0729, found 454.0800

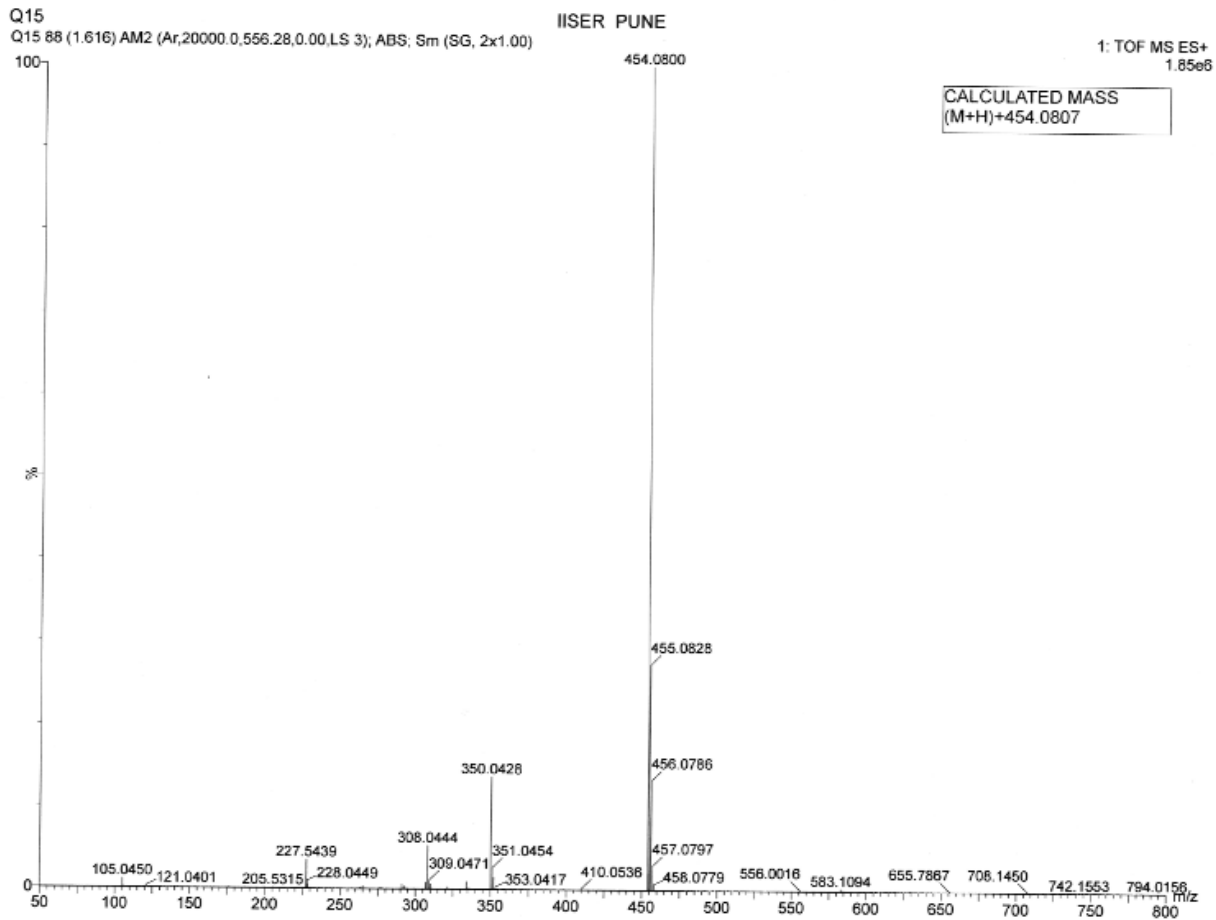



**7. a) General procedure for the synthesis of 1-(5-(benzo[d]oxazol-2-ylthio)-3-methyl-6-(p-tolyl)imidazo[2,1-b]thiazol-2-yl)ethanol (7k).**

NCS (1.5 mmol) was taken in round bottom flask containing CH<sub>3</sub>OH. To this same pot benzo[d]oxazole-2-thiol (**2c**) (**Scheme 2**) (2 mmol) was added slowly with constant stirring, and reaction mass was stirred at room temperature up to 5 minutes. As TLC indicate the formation of (NHTS). Furthermore to the same pot 1-(6-(4-chlorophenyl)-3-methylimidazo[2,1-b]thiazol-2-yl)ethanol (2 mmol) was added with small proportions at a time and stirring was continued for another 20 minutes, as TLC indicate the completion of reaction. The reaction mass was poured on ice cold water, solid product separated out was filtered, dried and washed with aqueous ethanol. No further purification like column chromatography was needed.

**b) Spectral data of 1-(5-(benzo[d]oxazol-2-ylthio)-3-methyl-6-(p-tolyl)imidazo[2,1-b]thiazol-2-yl)ethanol (7k).** white solid, mp 115-116 °C. <sup>1</sup>H-NMR (400 MHz, DMSO-*d*<sub>6</sub>,) δ 7.79-7.65 (m, 4H), 7.35-7.22 (m, 4H), 5.90 (s, 1H), 5.11-5.09 (m, 1H), 3.35 (s, 3H), 2.32 (s, 3H), 1.39-1.38 (m, 3H), 1.37. <sup>13</sup>C-NMR (400 MHz, DMSO-*d*<sub>6</sub>) δ 163.03, 153.19, 152.05, 151.77, 141.61, 138.28, 133.47, 130.54, 129.49, 128.18, 125.40, 124.85, 119.44, 111.15, 101.52, 62.09, 25.47, 21.30, 12.17.

# <sup>1</sup>H NMR

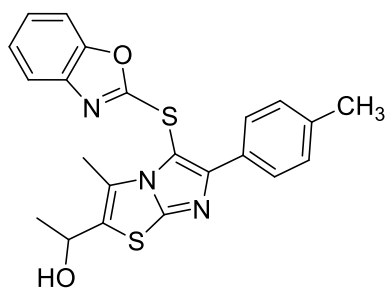

Shree ganesha  
Q24  
1H

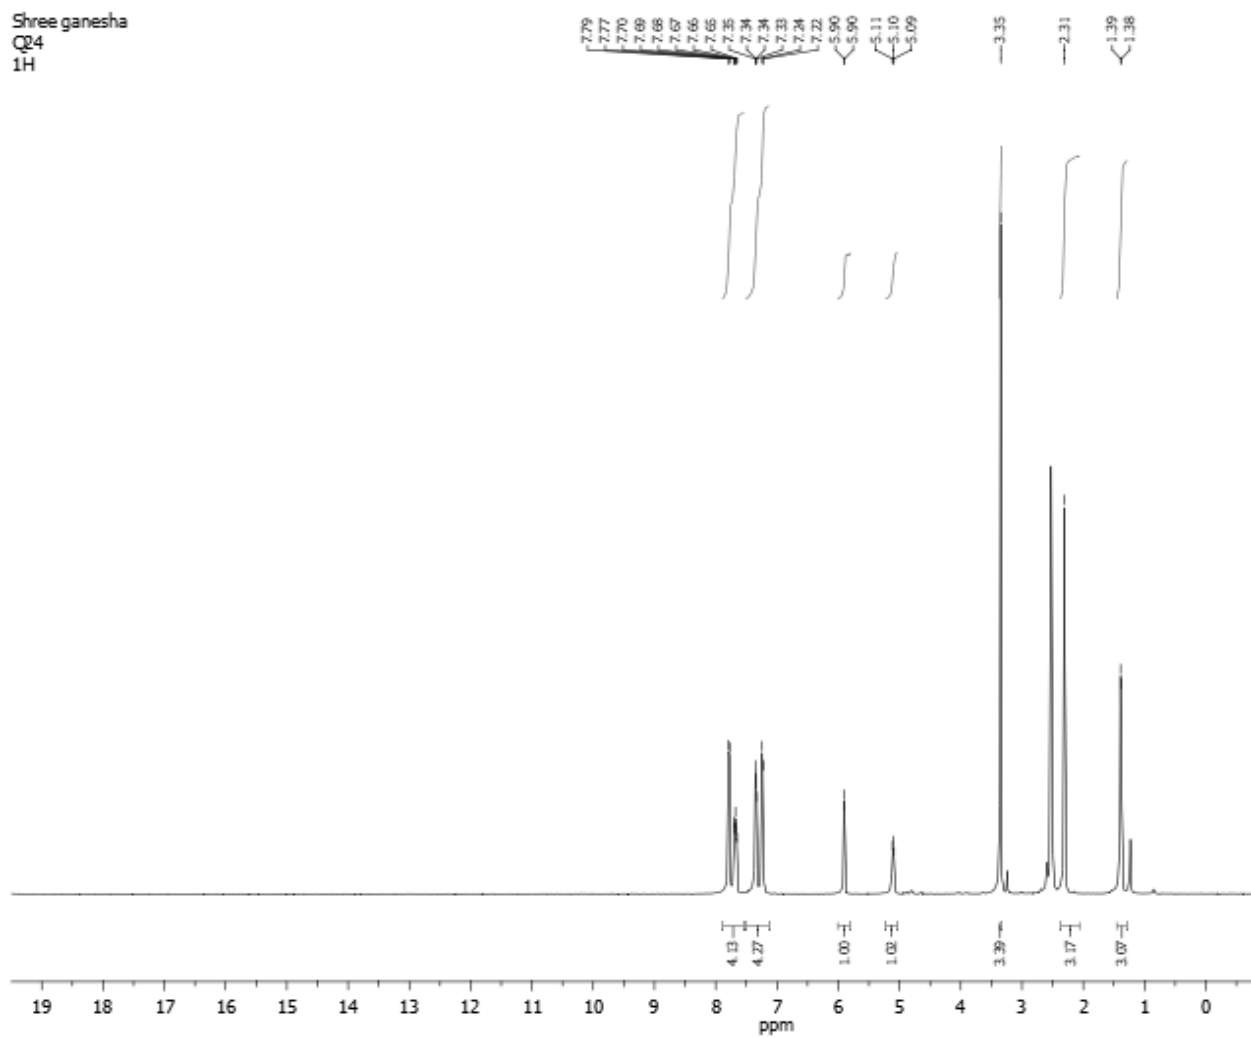

# <sup>13</sup>C NMR

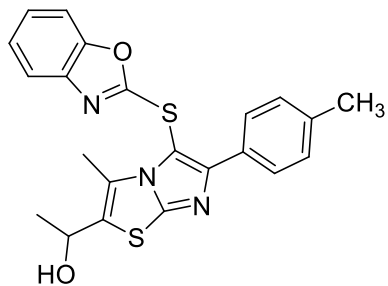

Shree ganesh  
Q4  
13C

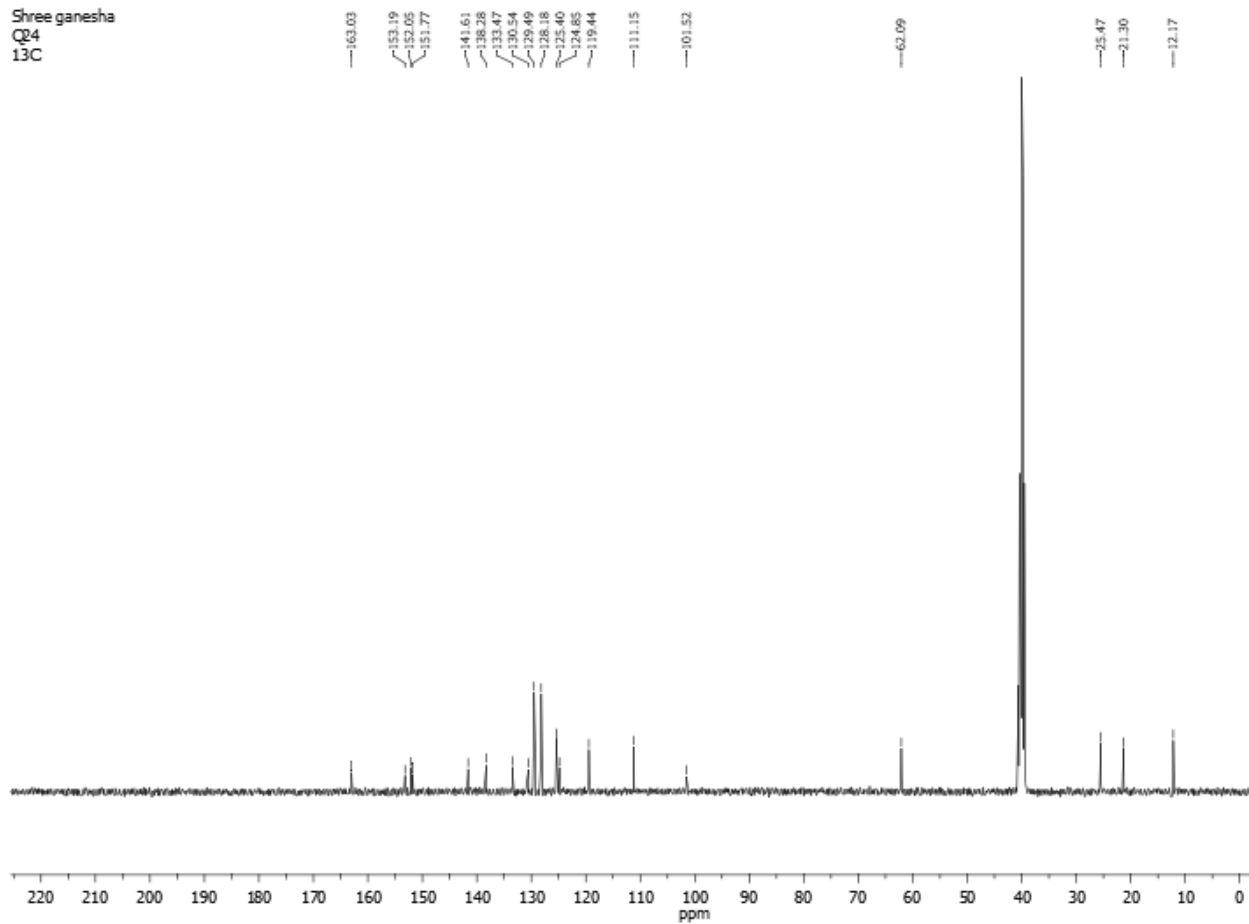

8. a) *General procedure for the synthesis of 1-((1H-benzo[d]imidazol-2-yl)thio)pyrrolidine-2,5-dione (NHTS) (3a)*

White solid, mp 60-61°C. <sup>1</sup>H-NMR (400 MHz, DMSO-*d*<sub>6</sub>) δ 13.44 (s, 1H), 7.76-7.32 (m, 4H), 2.51 (m, 4H). <sup>13</sup>C-NMR (400 MHz, DMSO-*d*<sub>6</sub>) δ 169.01, 142.68, 132.54, 131.60, 125.05, 123.36, 123.07, 112.61, 110.57.

**<sup>1</sup>H NMR**

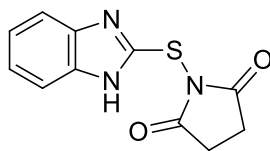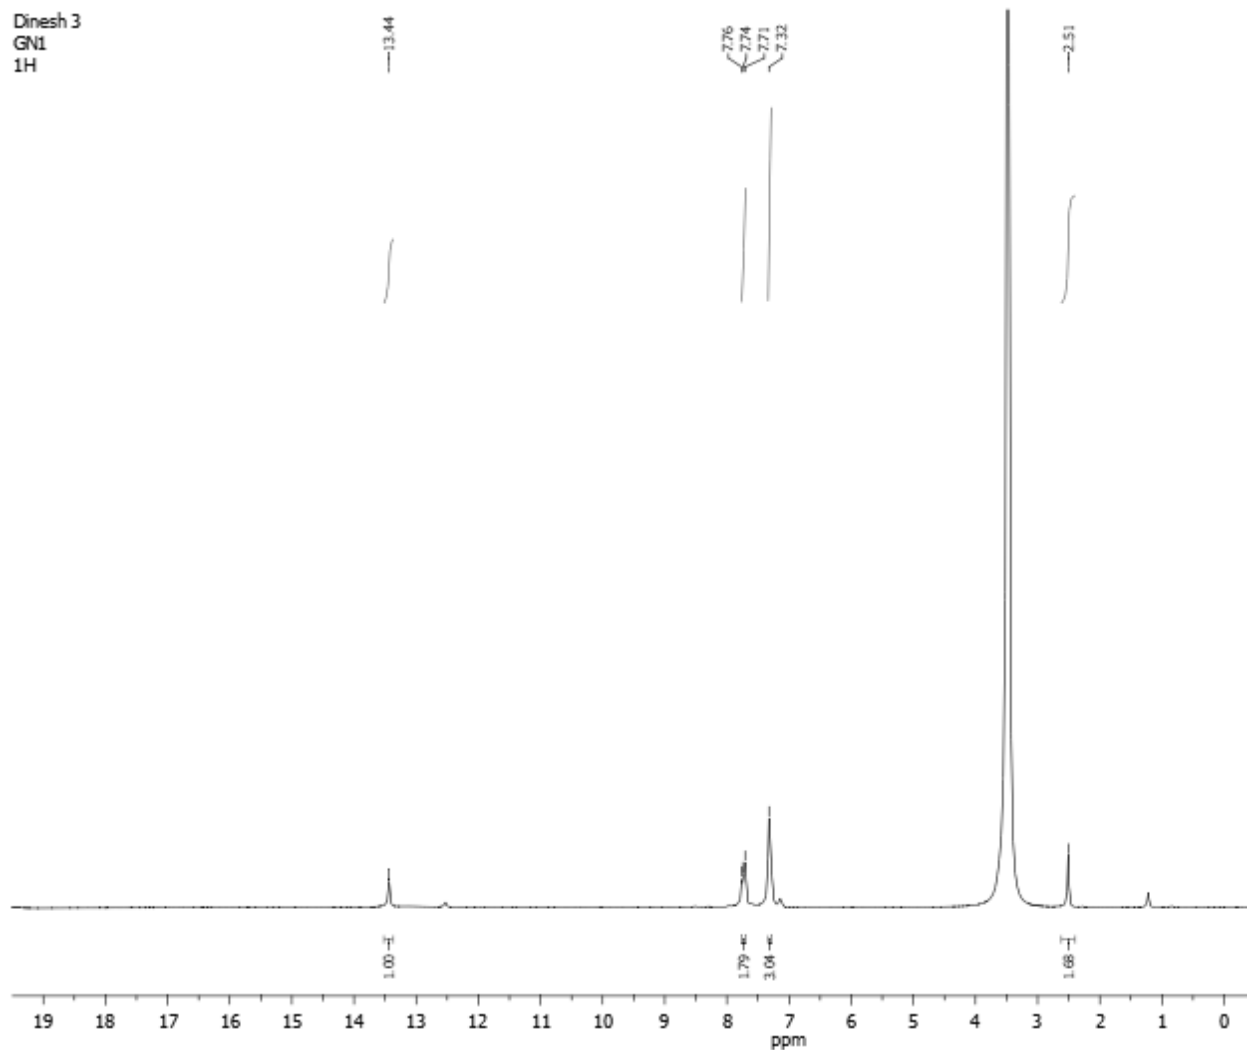

## <sup>13</sup>C NMR

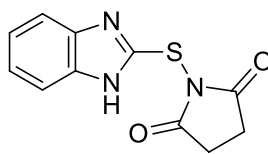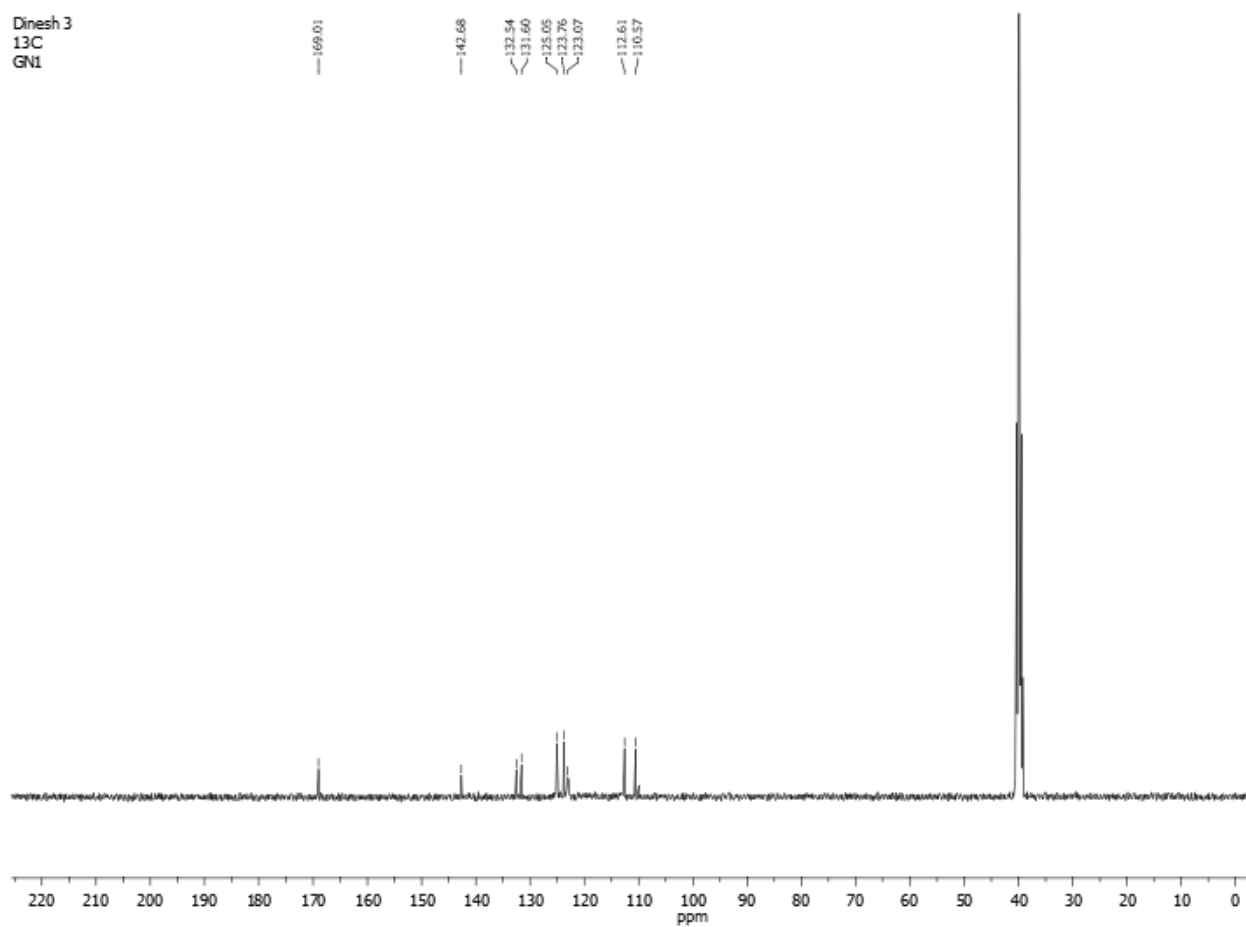

### Computational details:

The geometries of all molecules including NHTS, intermediates found in this study and product 7a have been fully optimized at B3LYP/6-31+G(d,p) level without symmetry constraints by using Gaussian 16 software<sup>1</sup>. The second order harmonic frequencies have been calculated and found with all positive values



Intermediate-1

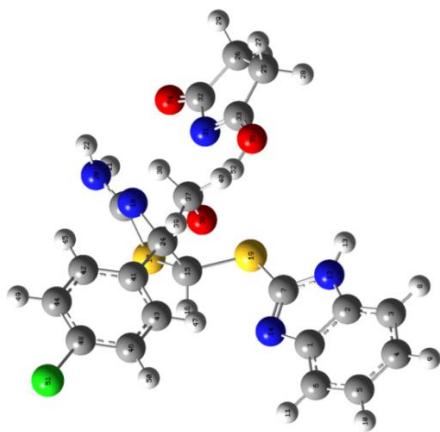

-2568.3853944

|                |                |                 |                |                |               |
|----------------|----------------|-----------------|----------------|----------------|---------------|
| (O35-H52)      | (C24-N18)      | (C15-H16)       | (C15-C24)      | (C24-O36)      | (C15-S19)     |
| 0.994          | 1.442          | 1.088           | 1.598          | 1.444          | 1.852         |
| (H52-O35-C33)  | (C15-C24-N18)  | (S19-C15-H16)   | (S19-C15-C24)  | (C24-O36-C37)  | (S19-C15-S17) |
| 111.8          | 109.9          | 106.1           | 117.5          | 115.3          | 107.3         |
| (O35-H52) str. | (C24-N18) Str. | (C15-H16) bend. | (C15-C24) Str. | (C24-O36) str. | (C15-S19)     |
| 3331.73        | 1054.71        | 1294.97         | 1085.26        | 1054.71        | 749.74        |
| 1191.8         | 46.6           | 111.9           | 163.0          | 46.6           | 8.6           |

Intermediate-2

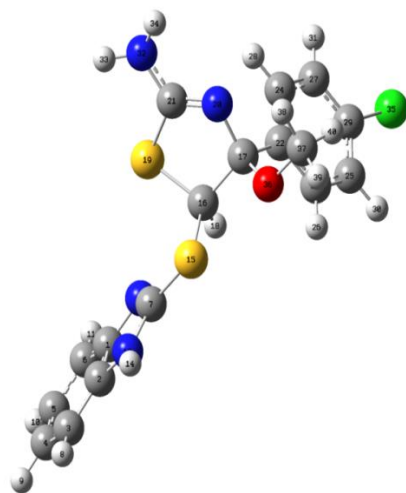

-2207.70598969

|                   |                    |                   |                   |                   |                   |
|-------------------|--------------------|-------------------|-------------------|-------------------|-------------------|
| (C17-N20)         | (C16-H18)          | (C16-S19)         | (C16-C17)         | (C17-O36)         | (S15-C16)         |
| 1.449             | 1.086              | 1.832             | 1.586             | 1.421             | 1.851             |
| (C16-C17-N20)     | (S15-C16-H18)      | (C17-C16-S19)     | (S15-C16-C17)     | (C17-O36-C37)     | (S15-C16-S19)     |
| 109.4             | 106.9              | 105.3             | 110.8             | 116.1             | 114.0             |
| (C17-N20)<br>str. | (C16-H18)<br>bend. | (C16-S19)<br>str. | (C16-C17)<br>str. | (C37-O36)<br>Str. | (S15-C16)<br>Str. |
| 1062.28           | 1263.55            | 768.84            | 1126.98           | 1126.98           | 768.84            |
| 41.3              | 57.6               | 62.5              | 236.3             | 236.3             | 62.5              |



Intermediate-3

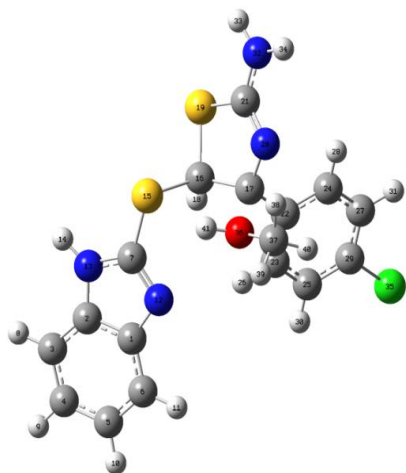

-2208.05602881

|               |               |               |               |                    |                    |                   |
|---------------|---------------|---------------|---------------|--------------------|--------------------|-------------------|
| (O36-H41)     | (C17-N20)     | (C16-H18)     | (C16-S19)     | (C16-C17)          | (C17-O36)          | (S15-C16)         |
| 1.000         | 1.408         | 1.088         | 1.827         | 1.590              | 1.575              | 1.876             |
| (H41-O36-C17) | (C16-C17-N20) | (S15-C16-H18) | (C17-C16-S19) | (S15-C16-C17)      | (C17-O36-C37)      | (S15-C16-S19)     |
| 107.5         | 110.9         | 107.5         | 103.0         | 115.2              | 118.6              | 109.8             |
|               |               |               |               | (O36-H41)<br>str.  | (C16-H18)<br>rock. | (S15-C16)<br>Str. |
|               |               |               |               | 3210.41<br>3214.19 | 1301.68            | 828.38            |
|               |               |               |               | 338.6<br>254.4     | 223.6              | 54.7              |

Intermediate-4

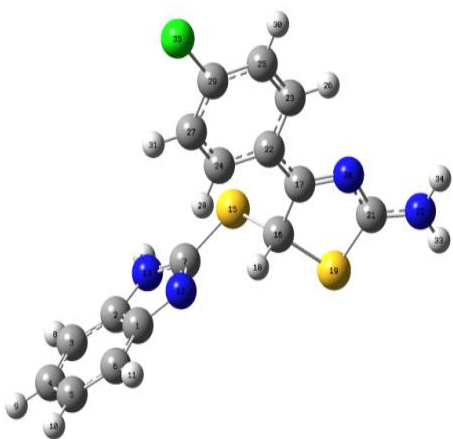

-2092.34875162

|               |                   |                   |                   |                   |
|---------------|-------------------|-------------------|-------------------|-------------------|
| (C17-C22)     | (C16-H18)         | (C17-N20)         | (C16-S19)         | (C16-C17)         |
| 1.440         | 1.100             | 1.321             | 1.847             | 1.526             |
| (C16-C17-C22) | (H18-C16-S19)     | (C16-C17-N20)     | (C17-C16-S19)     | (C17-C16-S15)     |
| 122.9         | 109.6             | 116.0             | 104.7             | 113.5             |
| (C17-C22)     | (C16-H18)<br>Str. | (C17-N20)<br>Str. | (C16-S19)<br>Str. | (C16-C17)<br>Str. |
| 1326.97       | 3016.38           | 1511.16           | 760.44            | 1084.30           |
| 442.9         | 203.1             | 238.0             | 36.4              | 41.5              |

7a

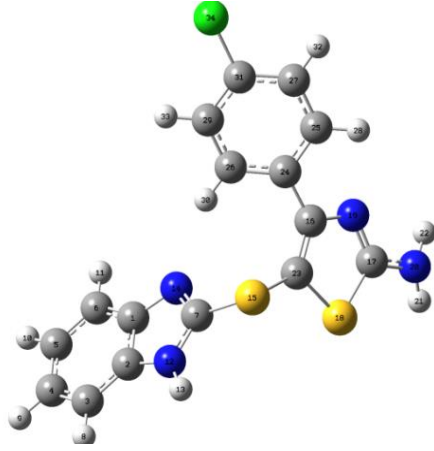

-2091.97347810

|                |                |                |                |
|----------------|----------------|----------------|----------------|
| (C16-C24)      | (C16-N19)      | (C23-S18)      | (C23-C16)      |
| 1.479          | 1.382          | 1.771          | 1.381          |
| (C24-C16-N19)  | (C23-C16-N19)  | (C16-C23-S18)  | (S15-C23-S18)  |
| 117.7          | 115.2          | 109.5          | 120.3          |
| (C16-C24) str. | (C16-N19) str. | (C23-S18) Str. | (C23-C16) str. |
| 1194.26        | 1361.38        | 848.52         | 1502.29        |
| 7.0            | 114.8          | 44.1           | 109.0          |

**Table S2: Optimized Geometry Cartesian Coordinates of all structures obtained at B3LYP/6 31+G(d,p) level**

| Sr.no | Molecule       | Cartesian coordinates |           |           |           |           |
|-------|----------------|-----------------------|-----------|-----------|-----------|-----------|
| 1     | NHTS           | 6                     | 0         | 2.480005  | -0.796902 | 0.083736  |
|       |                | 6                     | 0         | 2.268837  | 0.583005  | -0.174774 |
|       |                | 6                     | 0         | 3.253065  | 1.548802  | 0.066242  |
|       |                | 6                     | 0         | 4.467599  | 1.089749  | 0.568384  |
|       |                | 6                     | 0         | 4.695081  | -0.281834 | 0.827268  |
|       |                | 6                     | 0         | 3.712748  | -1.236691 | 0.590832  |
|       |                | 6                     | 0         | 0.482817  | -0.629654 | -0.654193 |
|       |                | 1                     | 0         | 3.084862  | 2.602385  | -0.133689 |
|       |                | 1                     | 0         | 5.262468  | 1.803220  | 0.764416  |
|       |                | 1                     | 0         | 5.659523  | -0.590377 | 1.219130  |
|       |                | 1                     | 0         | 3.878500  | -2.290610 | 0.788743  |
|       |                | 7                     | 0         | 0.982976  | 0.655483  | -0.668649 |
|       |                | 1                     | 0         | 0.441592  | 1.467442  | -0.946071 |
|       |                | 7                     | 0         | 1.339945  | -1.524649 | -0.218560 |
|       |                | 16                    | 0         | -1.106959 | -1.020671 | -1.321996 |
|       |                | 6                     | 0         | -3.885672 | 0.277147  | 1.338205  |
|       |                | 6                     | 0         | -3.423747 | 1.607597  | 0.723396  |
|       |                | 1                     | 0         | -4.945541 | 0.061288  | 1.178650  |
|       |                | 1                     | 0         | -3.701397 | 0.212370  | 2.414772  |
|       |                | 1                     | 0         | -4.206464 | 2.114393  | 0.150145  |
| 1     | 0              | -3.044956             | 2.326446  | 1.455096  |           |           |
| 7     | 0              | -2.161976             | -0.149644 | -0.236675 |           |           |
| 6     | 0              | -2.298788             | 1.243981  | -0.232812 |           |           |
| 6     | 0              | -3.060740             | -0.803605 | 0.649954  |           |           |
| 8     | 0              | -1.608187             | 2.015722  | -0.872838 |           |           |
| 8     | 0              | -3.140699             | -1.997436 | 0.799151  |           |           |
| 2     | Intermediate-1 | 6                     | 0         | 2.639122  | 2.941632  | -0.619426 |
|       |                | 6                     | 0         | 1.808376  | 3.942119  | -0.059675 |
|       |                | 6                     | 0         | 2.317033  | 5.113031  | 0.504182  |

|  |  |    |   |           |           |           |
|--|--|----|---|-----------|-----------|-----------|
|  |  | 6  | 0 | 3.704884  | 5.260882  | 0.497262  |
|  |  | 6  | 0 | 4.546858  | 4.276284  | -0.059026 |
|  |  | 6  | 0 | 4.029467  | 3.110618  | -0.621714 |
|  |  | 6  | 0 | 0.626964  | 2.234036  | -0.855601 |
|  |  | 1  | 0 | 1.671116  | 5.875208  | 0.929552  |
|  |  | 1  | 0 | 4.144683  | 6.155446  | 0.927627  |
|  |  | 1  | 0 | 5.621164  | 4.433656  | -0.049369 |
|  |  | 1  | 0 | 4.674926  | 2.354737  | -1.057458 |
|  |  | 7  | 0 | 0.518490  | 3.457137  | -0.227346 |
|  |  | 1  | 0 | -0.335310 | 3.860098  | 0.128356  |
|  |  | 7  | 0 | 1.867320  | 1.893733  | -1.113583 |
|  |  | 6  | 0 | -0.225945 | -0.395148 | -1.276824 |
|  |  | 1  | 0 | 0.754544  | -0.373955 | -1.748792 |
|  |  | 16 | 0 | -1.381145 | -1.386122 | -2.282146 |
|  |  | 7  | 0 | -1.328049 | -1.976620 | 0.299819  |
|  |  | 16 | 0 | -0.840907 | 1.352110  | -1.290676 |
|  |  | 7  | 0 | -3.119675 | -2.921362 | -0.886422 |
|  |  | 1  | 0 | -3.862950 | -2.528588 | -1.457499 |
|  |  | 1  | 0 | -3.463898 | -3.234867 | 0.013851  |
|  |  | 6  | 0 | -2.002568 | -2.144959 | -0.773898 |
|  |  | 6  | 0 | -0.162127 | -1.144653 | 0.132538  |
|  |  | 6  | 0 | -5.028597 | 1.538246  | 1.701421  |
|  |  | 6  | 0 | -6.099733 | 0.868658  | 0.826915  |
|  |  | 1  | 0 | -5.137758 | 1.334856  | 2.772012  |
|  |  | 1  | 0 | -4.968955 | 2.625444  | 1.585190  |
|  |  | 1  | 0 | -6.851539 | 0.314293  | 1.395128  |
|  |  | 1  | 0 | -6.633418 | 1.570128  | 0.178859  |
|  |  | 7  | 0 | -3.911845 | 0.017473  | 0.222407  |
|  |  | 6  | 0 | -5.286539 | -0.107612 | -0.044478 |
|  |  | 6  | 0 | -3.770220 | 0.886829  | 1.173511  |
|  |  | 8  | 0 | -5.752175 | -0.896715 | -0.846916 |
|  |  | 8  | 0 | -2.612884 | 1.228036  | 1.701315  |
|  |  | 8  | 0 | -0.195097 | -0.114086 | 1.142151  |
|  |  | 6  | 0 | 0.028607  | -0.565058 | 2.489541  |

|   |                |    |   |           |           |           |
|---|----------------|----|---|-----------|-----------|-----------|
|   |                | 1  | 0 | -0.665376 | -1.370961 | 2.746772  |
|   |                | 1  | 0 | 1.060059  | -0.902923 | 2.622692  |
|   |                | 1  | 0 | -0.154177 | 0.302847  | 3.125789  |
|   |                | 6  | 0 | 1.140632  | -1.952928 | 0.223513  |
|   |                | 6  | 0 | 1.119139  | -3.336914 | 0.425731  |
|   |                | 6  | 0 | 2.380216  | -1.303663 | 0.114008  |
|   |                | 6  | 0 | 2.306471  | -4.068318 | 0.517941  |
|   |                | 1  | 0 | 0.166812  | -3.846449 | 0.516776  |
|   |                | 6  | 0 | 3.572569  | -2.020541 | 0.208958  |
|   |                | 1  | 0 | 2.418701  | -0.231616 | -0.057713 |
|   |                | 6  | 0 | 3.524699  | -3.401203 | 0.410600  |
|   |                | 1  | 0 | 2.283075  | -5.141606 | 0.671884  |
|   |                | 1  | 0 | 4.528059  | -1.514731 | 0.122690  |
|   |                | 17 | 0 | 5.026029  | -4.310932 | 0.528323  |
|   |                | 1  | 0 | -1.857688 | 0.730576  | 1.287907  |
| 3 | Intermediate-2 | 6  | 0 | -3.871203 | 1.120315  | 0.339541  |
|   |                | 6  | 0 | -4.703471 | 0.446281  | -0.585786 |
|   |                | 6  | 0 | -6.065387 | 0.721323  | -0.711109 |
|   |                | 6  | 0 | -6.586430 | 1.706748  | 0.130078  |
|   |                | 6  | 0 | -5.772253 | 2.387591  | 1.057194  |
|   |                | 6  | 0 | -4.411428 | 2.105431  | 1.174407  |
|   |                | 6  | 0 | -2.599874 | -0.271542 | -0.688927 |
|   |                | 1  | 0 | -6.695457 | 0.199263  | -1.425035 |
|   |                | 1  | 0 | -7.642041 | 1.953206  | 0.066848  |
|   |                | 1  | 0 | -6.217016 | 3.147967  | 1.692138  |
|   |                | 1  | 0 | -3.780478 | 2.627590  | 1.886402  |
|   |                | 7  | 0 | -2.564665 | 0.648108  | 0.246735  |
|   |                | 7  | 0 | -3.856754 | -0.445473 | -1.232772 |
|   |                | 1  | 0 | -4.107324 | -1.108975 | -1.950079 |
|   |                | 16 | 0 | -1.245678 | -1.229139 | -1.290332 |
|   |                | 6  | 0 | 0.011974  | -0.656816 | -0.059392 |
|   |                | 6  | 0 | 1.442944  | -1.252629 | -0.396299 |
|   |                | 1  | 0 | 0.000484  | 0.430546  | -0.078184 |
|   |                | 16 | 0 | -0.336047 | -1.181136 | 1.661472  |

|   |                |    |   |           |           |           |
|---|----------------|----|---|-----------|-----------|-----------|
|   |                | 7  | 0 | 1.708095  | -2.386124 | 0.465877  |
|   |                | 6  | 0 | 0.936481  | -2.432672 | 1.486273  |
|   |                | 6  | 0 | 2.505860  | -0.149642 | -0.231034 |
|   |                | 6  | 0 | 2.564465  | 0.887132  | -1.174301 |
|   |                | 6  | 0 | 3.404920  | -0.137495 | 0.838736  |
|   |                | 6  | 0 | 3.498806  | 1.915009  | -1.055590 |
|   |                | 1  | 0 | 1.880218  | 0.882383  | -2.017674 |
|   |                | 6  | 0 | 4.346730  | 0.886983  | 0.973571  |
|   |                | 1  | 0 | 3.380893  | -0.938148 | 1.569048  |
|   |                | 6  | 0 | 4.384379  | 1.905380  | 0.024031  |
|   |                | 1  | 0 | 3.541542  | 2.712483  | -1.789429 |
|   |                | 1  | 0 | 5.042813  | 0.890689  | 1.805259  |
|   |                | 7  | 0 | 1.071515  | -3.339403 | 2.501517  |
|   |                | 1  | 0 | 0.253739  | -3.568526 | 3.047547  |
|   |                | 1  | 0 | 1.708609  | -4.103746 | 2.319937  |
|   |                | 17 | 0 | 5.568146  | 3.197429  | 0.182741  |
|   |                | 8  | 0 | 1.371572  | -1.660450 | -1.755580 |
|   |                | 6  | 0 | 2.495477  | -2.390224 | -2.254378 |
|   |                | 1  | 0 | 2.627541  | -3.326510 | -1.705225 |
|   |                | 1  | 0 | 2.268358  | -2.597033 | -3.301846 |
|   |                | 1  | 0 | 3.415389  | -1.796278 | -2.191491 |
| 4 | Intermediate-3 | 6  | 0 | -3.448421 | 0.705781  | -0.391885 |
|   |                | 6  | 0 | -4.238897 | -0.072563 | 0.489314  |
|   |                | 6  | 0 | -5.486644 | 0.353421  | 0.956735  |
|   |                | 6  | 0 | -5.920057 | 1.598242  | 0.512613  |
|   |                | 6  | 0 | -5.143378 | 2.388567  | -0.366547 |
|   |                | 6  | 0 | -3.906065 | 1.958948  | -0.828873 |
|   |                | 6  | 0 | -2.344718 | -1.094154 | -0.031451 |
|   |                | 1  | 0 | -6.088273 | -0.248760 | 1.629665  |
|   |                | 1  | 0 | -6.881600 | 1.973225  | 0.848179  |
|   |                | 1  | 0 | -5.529778 | 3.350649  | -0.687005 |
|   |                | 1  | 0 | -3.312167 | 2.559080  | -1.510148 |
|   |                | 7  | 0 | -2.274134 | 0.030681  | -0.704056 |
|   |                | 7  | 0 | -3.495684 | -1.221268 | 0.711104  |

|   |                |    |   |           |           |           |
|---|----------------|----|---|-----------|-----------|-----------|
|   |                | 1  | 0 | -3.745131 | -2.007354 | 1.294686  |
|   |                | 16 | 0 | -1.133274 | -2.388682 | -0.064532 |
|   |                | 6  | 0 | 0.371374  | -1.503094 | 0.621970  |
|   |                | 6  | 0 | 1.417616  | -1.002129 | -0.465125 |
|   |                | 1  | 0 | 0.014860  | -0.674650 | 1.231134  |
|   |                | 16 | 0 | 1.356384  | -2.656651 | 1.639966  |
|   |                | 7  | 0 | 2.399559  | -1.981655 | -0.704932 |
|   |                | 6  | 0 | 2.507173  | -2.826236 | 0.270969  |
|   |                | 6  | 0 | 1.929068  | 0.397784  | -0.208516 |
|   |                | 6  | 0 | 1.028992  | 1.474330  | -0.118116 |
|   |                | 6  | 0 | 3.299301  | 0.627626  | -0.033008 |
|   |                | 6  | 0 | 1.493924  | 2.758629  | 0.148426  |
|   |                | 1  | 0 | -0.034208 | 1.314782  | -0.278809 |
|   |                | 6  | 0 | 3.771670  | -1.911780 | 0.240620  |
|   |                | 1  | 0 | 4.000585  | -0.195019 | -0.112653 |
|   |                | 6  | 0 | 2.865521  | 2.969659  | 0.331627  |
|   |                | 1  | 0 | 0.803460  | 3.592101  | 0.213878  |
|   |                | 1  | 0 | 4.831999  | 2.090051  | 0.380159  |
|   |                | 7  | 0 | 3.449882  | -3.776489 | 0.340607  |
|   |                | 1  | 0 | 3.437182  | -4.490574 | 1.052789  |
|   |                | 1  | 0 | 4.130599  | -3.848756 | -0.403237 |
|   |                | 17 | 0 | 3.447991  | 4.577534  | 0.672965  |
|   |                | 8  | 0 | 0.574220  | -0.860929 | -1.787593 |
|   |                | 6  | 0 | 1.286576  | -0.823286 | -3.077068 |
|   |                | 1  | 0 | 1.818694  | -1.760637 | -3.226037 |
|   |                | 1  | 0 | 0.515397  | -0.648712 | -3.825908 |
|   |                | 1  | 0 | 1.970127  | 0.020957  | -3.017594 |
|   |                | 1  | 0 | -0.166664 | -1.530419 | -1.744885 |
| 5 | Intermediate-4 | 6  | 0 | 3.282211  | 0.555601  | -0.567702 |
|   |                | 6  | 0 | 3.981057  | 0.373940  | 0.646964  |
|   |                | 6  | 0 | 5.291943  | 0.814319  | 0.834585  |
|   |                | 6  | 0 | 5.892152  | 1.451168  | -0.250369 |
|   |                | 6  | 0 | 5.208290  | 1.640098  | -1.469975 |
|   |                | 6  | 0 | 3.900275  | 1.197670  | -1.647669 |



|   |    |    |   |           |           |           |
|---|----|----|---|-----------|-----------|-----------|
|   |    | 6  | 0 | 1.937003  | -0.468168 | 0.753614  |
|   |    | 1  | 0 | 5.822331  | 0.671332  | 1.770450  |
|   |    | 1  | 0 | 6.911711  | 1.810121  | -0.153923 |
|   |    | 1  | 0 | 5.717171  | 2.142214  | -2.286430 |
|   |    | 1  | 0 | 3.372922  | 1.340629  | -2.584921 |
|   |    | 7  | 0 | 1.995487  | 0.022759  | -0.457743 |
|   |    | 7  | 0 | 3.083289  | -0.294456 | 1.480531  |
|   |    | 1  | 0 | 3.265346  | -0.637742 | 2.412842  |
|   |    | 16 | 0 | 0.505471  | -1.252955 | 1.462191  |
|   |    | 6  | 0 | -0.345589 | -1.656356 | -0.119323 |
|   |    | 6  | 0 | -1.811598 | -1.233950 | -0.146203 |
|   |    | 1  | 0 | 0.243947  | -1.143663 | -0.893463 |
|   |    | 16 | 0 | -0.374365 | -3.467668 | -0.479658 |
|   |    | 7  | 0 | -2.693227 | -2.211244 | -0.258985 |
|   |    | 6  | 0 | -2.117685 | -3.419426 | -0.417536 |
|   |    | 6  | 0 | -2.229641 | 0.141756  | -0.072655 |
|   |    | 6  | 0 | -3.605842 | 0.440457  | 0.099137  |
|   |    | 6  | 0 | -1.306000 | 1.208237  | -0.207282 |
|   |    | 6  | 0 | -4.042185 | 1.752320  | 0.151341  |
|   |    | 1  | 0 | -4.316539 | -0.371398 | 0.199937  |
|   |    | 6  | 0 | -1.743476 | 2.523037  | -0.170043 |
|   |    | 1  | 0 | -0.249646 | 1.017161  | -0.369037 |
|   |    | 6  | 0 | -3.107471 | 2.791995  | 0.015525  |
|   |    | 1  | 0 | -5.091806 | 1.983260  | 0.293316  |
|   |    | 1  | 0 | -1.041376 | 3.340787  | -0.285994 |
|   |    | 7  | 0 | -2.872834 | -4.498962 | -0.546475 |
|   |    | 1  | 0 | -2.484273 | -5.424630 | -0.666697 |
|   |    | 1  | 0 | -3.880752 | -4.393038 | -0.533846 |
|   |    | 17 | 0 | -3.650377 | 4.434827  | 0.074205  |
| 6 | 7a | 6  | 0 | 3.123438  | -1.036023 | -0.574974 |
|   |    | 6  | 0 | 3.961771  | -0.791791 | 0.540400  |
|   |    | 6  | 0 | 5.301140  | -1.186006 | 0.574936  |
|   |    | 6  | 0 | 5.789759  | -1.840613 | -0.555635 |
|   |    | 6  | 0 | 4.968142  | -2.093408 | -1.674537 |

|  |  |    |   |           |           |           |
|--|--|----|---|-----------|-----------|-----------|
|  |  | 6  | 0 | 3.632831  | -1.697657 | -1.700149 |
|  |  | 6  | 0 | 1.904659  | -0.014744 | 0.860287  |
|  |  | 1  | 0 | 5.936160  | -0.994886 | 1.434705  |
|  |  | 1  | 0 | 6.826313  | -2.163423 | -0.574141 |
|  |  | 1  | 0 | 5.389557  | -2.608875 | -2.532284 |
|  |  | 1  | 0 | 2.996642  | -1.890453 | -2.557856 |
|  |  | 7  | 0 | 3.147541  | -0.131068 | 1.448707  |
|  |  | 1  | 0 | 3.418979  | 0.273868  | 2.332216  |
|  |  | 7  | 0 | 1.843164  | -0.549008 | -0.333204 |
|  |  | 16 | 0 | 0.573412  | 0.733082  | 1.779122  |
|  |  | 6  | 0 | -1.453461 | 1.435487  | -0.083808 |
|  |  | 6  | 0 | -1.183484 | 3.539670  | -0.762972 |
|  |  | 16 | 0 | 0.251389  | 3.352408  | 0.231040  |
|  |  | 7  | 0 | -1.959301 | 2.490284  | -0.819327 |
|  |  | 7  | 0 | -1.480353 | 4.722987  | -1.387647 |
|  |  | 1  | 0 | -0.725022 | 5.358608  | -1.597473 |
|  |  | 1  | 0 | -2.196746 | 4.653471  | -2.098815 |
|  |  | 6  | 0 | -0.264516 | 1.692144  | 0.570587  |
|  |  | 6  | 0 | -2.230611 | 0.177753  | -0.060171 |
|  |  | 6  | 0 | -3.633179 | 0.239965  | 0.000160  |
|  |  | 6  | 0 | -1.610181 | -1.080079 | -0.130434 |
|  |  | 6  | 0 | -4.402085 | -0.922063 | 0.025348  |
|  |  | 1  | 0 | -4.120570 | 1.208725  | 0.028167  |
|  |  | 6  | 0 | -2.371867 | -2.249400 | -0.111379 |
|  |  | 1  | 0 | -0.532987 | -1.147058 | -0.241080 |
|  |  | 6  | 0 | -3.760632 | -2.160662 | -0.025644 |
|  |  | 1  | 0 | -5.483896 | -0.869318 | 0.081295  |
|  |  | 1  | 0 | -1.890264 | -3.219035 | -0.175887 |
|  |  | 17 | 0 | -4.723687 | -3.633957 | 0.001574  |

**Table S3: First three vibrational frequencies obtained at B3LYP/6-31+G(d,p) level**

| Sr.no | Molecule       | Frequencies (cm <sup>-1</sup> ) | IR Intensity (KM/Mole) |
|-------|----------------|---------------------------------|------------------------|
| 1     | NHTS           | 32.8585                         | 1.0604                 |
|       |                | 38.4795                         | 1.8192                 |
|       |                | 65.4810                         | 1.6805                 |
| 2     | Intermediate-1 | 8.7058                          | 0.2000                 |
|       |                | 19.6068                         | 0.9536                 |
|       |                | 22.8512                         | 0.3580                 |
| 3     | Intermediate-2 | 14.1242                         | 0.7230                 |
|       |                | 21.1133                         | 0.8494                 |
|       |                | 29.3789                         | 0.5813                 |
| 4     | Intermediate-3 | 11.4077                         | 1.7622                 |
|       |                | 21.6816                         | 0.9774                 |
|       |                | 35.5339                         | 1.3702                 |
| 5     | Intermediate-4 | 16.8384                         | 0.2711                 |
|       |                | 27.6926                         | 1.3219                 |
|       |                | 43.6896                         | 3.0171                 |
| 6     | 7a             | 16.6459                         | 2.0015                 |
|       |                | 23.9034                         | 0.6560                 |
|       |                | 37.6693                         | 1.1543                 |

**References.**

1. Gaussian 16, Revision B.01, M. J. Frish, G. W. Truck, H. B. Schlegel, G. E. Scuseria, M. A. Robb, J. R. Cheeseman, G. Scalmani, V. Barone, G. A. Petersson, H. Nakatsuji, H. Li, M. Caricato, A. V. Marenich, J. Bloino, B. G. Janesko, R. Gomperts, B. Mennucci, H. P. Hratchian, J. V. Ortiz, A. F. Izmayloy J. L. Sonnenberg, D. Williams-Young, F. Ding, F. Lipparini, F. Egidi, J. Goings, B. Peng, A. Petrone, T. Henderson, D. Ranasinghe, V. G. Zakrzewski, J. Gao, N. Rega, G. Zheng, W. Liang, M. Hada, M. Ehara, K. Toyota, R. Fkunda, J. Hasegawa, M. Ishida, T. Nakajima, Y. Honda, O. Kitao, H. Nakai. T. Vreven, K. Throssell, J. A. Montgomery, Jr. J. E. Peralta, F. Ogliaro, M. J. Bearpark, J. J. Heyd, E. N. Brothers, K. N. Kudin, V. N. Staroverov, T. A. Keith, R. Kobayashi, J. Normand, K. Raghayachari, A. P. Rendell, J. C. Burant, S. S. Iyengar, J. Tomasi, M. Cossi, J. M. Millam, M. Klene, C. Adamo, R. Cammi, J. W. Ochterski, R. L. Martin, K. Morokuma, O. Farkas, J. B. Foresman, D. J. Fox, Gaussian, Inc., Wallingford CT, 2016.
2. GaussView, Version 6.1, Roy Dennington, A. K. Todd, M. M. John, Semichem Inc., Shawnee Mission, KS, 2016
